# Supplementary material for: Better Outcomes for Older people with Spinal Trouble (BOOST) Trial: a randomised controlled trial of a combined physical and psychological intervention for older adults with neurogenic claudication, a protocol
Source: PubMed Central journal article supplement (PMC6196848; doi:10.1136/bmjopen-2018-022205), 2018-10-18
Supplement: bmjopen-2018-022205.draft_revisions.pdf [file bmjopen-2018-022205.draft_revisions.pdf]

# BMJ Open

BMJ Open is committed to open peer review. As part of this commitment we make the peer review history of every article we publish publicly available.

When an article is published we post the peer reviewers' comments and the authors' responses online. We also post the versions of the paper that were used during peer review. These are the versions that the peer review comments apply to.

The versions of the paper that follow are the versions that were submitted during the peer review process. They are not the versions of record or the final published versions. They should not be cited or distributed as the published version of this manuscript.

BMJ Open is an open access journal and the full, final, typeset and author-corrected version of record of the manuscript is available on our site with no access controls, subscription charges or pay-per-view fees (<http://bmjopen.bmj.com>).

If you have any questions on BMJ Open's open peer review process please email [info.bmjopen@bmj.com](mailto:info.bmjopen@bmj.com)

# BMJ Open

## Better Outcomes for Older people with Spinal Trouble [BOOST] Trial: A randomised controlled trial of a combined physical and psychological intervention for older adults with neurogenic claudication (protocol)

|                               |                                                                                                                                                                                                                                                                                                                                                                                                                                                                                                                                                                                                                                                                                                                                                                                                                                                                                                                                                                                                                                                                                                                                                                                                                                                                                                                                                                                                                                                                                                                                                                                                                                                                                                                                                                                                                                                                                                                                                                                                                                                                                                                                                                                                                                                                                                                                                                                                                              |
|-------------------------------|------------------------------------------------------------------------------------------------------------------------------------------------------------------------------------------------------------------------------------------------------------------------------------------------------------------------------------------------------------------------------------------------------------------------------------------------------------------------------------------------------------------------------------------------------------------------------------------------------------------------------------------------------------------------------------------------------------------------------------------------------------------------------------------------------------------------------------------------------------------------------------------------------------------------------------------------------------------------------------------------------------------------------------------------------------------------------------------------------------------------------------------------------------------------------------------------------------------------------------------------------------------------------------------------------------------------------------------------------------------------------------------------------------------------------------------------------------------------------------------------------------------------------------------------------------------------------------------------------------------------------------------------------------------------------------------------------------------------------------------------------------------------------------------------------------------------------------------------------------------------------------------------------------------------------------------------------------------------------------------------------------------------------------------------------------------------------------------------------------------------------------------------------------------------------------------------------------------------------------------------------------------------------------------------------------------------------------------------------------------------------------------------------------------------------|
| Journal:                      | <i>BMJ Open</i>                                                                                                                                                                                                                                                                                                                                                                                                                                                                                                                                                                                                                                                                                                                                                                                                                                                                                                                                                                                                                                                                                                                                                                                                                                                                                                                                                                                                                                                                                                                                                                                                                                                                                                                                                                                                                                                                                                                                                                                                                                                                                                                                                                                                                                                                                                                                                                                                              |
| Manuscript ID                 | bmjopen-2018-022205                                                                                                                                                                                                                                                                                                                                                                                                                                                                                                                                                                                                                                                                                                                                                                                                                                                                                                                                                                                                                                                                                                                                                                                                                                                                                                                                                                                                                                                                                                                                                                                                                                                                                                                                                                                                                                                                                                                                                                                                                                                                                                                                                                                                                                                                                                                                                                                                          |
| Article Type:                 | Protocol                                                                                                                                                                                                                                                                                                                                                                                                                                                                                                                                                                                                                                                                                                                                                                                                                                                                                                                                                                                                                                                                                                                                                                                                                                                                                                                                                                                                                                                                                                                                                                                                                                                                                                                                                                                                                                                                                                                                                                                                                                                                                                                                                                                                                                                                                                                                                                                                                     |
| Date Submitted by the Author: | 06-Feb-2018                                                                                                                                                                                                                                                                                                                                                                                                                                                                                                                                                                                                                                                                                                                                                                                                                                                                                                                                                                                                                                                                                                                                                                                                                                                                                                                                                                                                                                                                                                                                                                                                                                                                                                                                                                                                                                                                                                                                                                                                                                                                                                                                                                                                                                                                                                                                                                                                                  |
| Complete List of Authors:     | <p>Williamson, Esther; University of Oxford Nuffield Department of Orthopaedics Rheumatology and Musculoskeletal Sciences, Centre for Rehabilitation Research</p> <p>Ward, Lesley; University of Oxford Nuffield Department of Orthopaedics Rheumatology and Musculoskeletal Sciences, Centre for Rehabilitation Research</p> <p>Vadher , Karan; University of Oxford, Centre for Statistics in Medicine</p> <p>Dutton, Susan; University of Oxford, Centre for Statistics in Medicine</p> <p>Parker, Ben; University of Warwick, Warwick Medical School</p> <p>Petrou, Stavros; University of Warwick, Warwick Medical School</p> <p>Hutchinson, Charles; University of Warwick, Warwick Medical School</p> <p>Gagen , Richard; University of Warwick, Warwick Medical School</p> <p>Arden, Nigel; University of Oxford Nuffield Department of Orthopaedics Rheumatology and Musculoskeletal Sciences</p> <p>Barker, Karen; Nuffield Orthopaedic Centre, Oxford University Hospitals NHS Trust,</p> <p>Boniface, Graham; University of Oxford Nuffield Department of Orthopaedics Rheumatology and Musculoskeletal Sciences, Centre for Rehabilitation Research</p> <p>Bruce, Julie; University of Warwick, Warwick Clinical Trials Unit</p> <p>Collins, Gary; University of Oxford, Centre for Statistics in Medicine</p> <p>fairbank, jeremy; University of Oxford Nuffield Department of Orthopaedics Rheumatology and Musculoskeletal Sciences</p> <p>Fitch , Judith ; Patient and Public Involvement Representative</p> <p>French, David; University of Manchester, School of Psychological Sciences</p> <p>Garrett, Angela; University of Oxford Nuffield Department of Orthopaedics Rheumatology and Musculoskeletal Sciences, Centre for Rehabilitation Research</p> <p>Ghandi, Varsha; University of Oxford Nuffield Department of Orthopaedics Rheumatology and Musculoskeletal Sciences, Centre for Rehabilitation Research</p> <p>Griffiths, Frances; University of Warwick, Warwick Medical School</p> <p>Hansen, Zara; University of Oxford Nuffield Department of Orthopaedics Rheumatology and Musculoskeletal Sciences, Centre for Rehabilitation Research</p> <p>Mallen, Christian; Keele University, Arthritis Research UK Primary Care Centre</p> <p>Morris , Alana ; University of Oxford Nuffield Department of Orthopaedics Rheumatology and Musculoskeletal Sciences, Centre for Rehabilitation</p> |

1  
2  
3  
4  
5  
6  
7  
8  
9  
10  
11  
12  
13  
14  
15  
16  
17  
18  
19  
20  
21  
22  
23  
24  
25  
26  
27  
28  
29  
30  
31  
32  
33  
34  
35  
36  
37  
38  
39  
40  
41  
42  
43  
44  
45  
46  
47  
48  
49  
50  
51  
52  
53  
54  
55  
56  
57  
58  
59  
60

|           |                                                                                                                                                                       |
|-----------|-----------------------------------------------------------------------------------------------------------------------------------------------------------------------|
|           | Research<br>Lamb, Sarah; University of Oxford Nuffield Department of Orthopaedics<br>Rheumatology and Musculoskeletal Sciences, Centre for Rehabilitation<br>Research |
| Keywords: | Neurogenic Claudication, Spinal Stenosis, Exercise, Cognitive Behavioural<br>Techniques, Physiotherapy, Randomised controlled trial                                   |
|           |                                                                                                                                                                       |

SCHOLARONE™  
Manuscripts

For peer review only

1  
2  
3  
4  
5 **Better Outcomes for Older people with Spinal Trouble [BOOST] Trial:**  
6 **A randomised controlled trial of a combined physical and**  
7 **psychological intervention for older adults with neurogenic**  
8 **claudication (protocol)**  
9  
10

11  
12 **Authors:**  
13

14 Esther Williamson<sup>1</sup>, Lesley Ward<sup>1</sup>, Karan Vadher<sup>2</sup>, Susan J Dutton<sup>2</sup>, Ben Parker<sup>3</sup>, Stavros Petrou<sup>3</sup>,  
15 Charles Hutchinson<sup>3</sup>, Richard Gagen<sup>3</sup>, Nigel Arden<sup>1</sup>, Karen Barker<sup>4</sup>, Graham Boniface<sup>1</sup>, Julie Bruce<sup>3</sup>,  
16 Gary Collins<sup>2</sup>, Jeremy Fairbank<sup>1</sup>, Judith Fitch<sup>5</sup>, David P French<sup>6</sup>, Angela Garrett<sup>1</sup>, Varsha Ghandi<sup>1</sup>,  
17 Frances Griffiths<sup>3</sup>, Zara Hansen<sup>1</sup>, Christian Mallen<sup>7</sup>, Alana Morris<sup>1</sup> and Sarah E Lamb<sup>1</sup>  
18  
19  
20  
21

22 <sup>1</sup>Nuffield Department of Rheumatology, Orthopaedics and Musculoskeletal Sciences, University of  
23 Oxford, UK  
24

25 <sup>2</sup> Oxford Clinical Trials Research Unit, Centre for Statistics in Medicine, Nuffield Department of  
26 Orthopaedics, Rheumatology and Musculoskeletal Sciences, University of Oxford, UK  
27

28 <sup>3</sup> Warwick Medical School, University of Warwick, UK  
29

30 <sup>4</sup> Oxford University Hospitals NHS Trust, Oxford, UK  
31

32 <sup>5</sup> Patient and Public Involvement Representative  
33

34 <sup>6</sup> Manchester Centre for Health Psychology, School of Health Sciences, University of Manchester, UK  
35

36 <sup>7</sup> Arthritis Research UK Primary Care Centre, Institute for Primary Care and Health Sciences, Keele  
37 University, Keele, UK  
38  
39

40 **Correspondence to:** Dr Esther Williamson, Centre for Rehabilitation Research, Nuffield Department  
41 of Orthopaedics, Rheumatology and Musculoskeletal Sciences, University of Oxford, Botnar Research  
42 Building, Windmill Road, Oxford, OX3 7LD, UK. Tel: +44 1865 223120; Email:  
43 [esther.williamson@ndorms.ox.ac.uk](mailto:esther.williamson@ndorms.ox.ac.uk)  
44  
45  
46  
47  
48  
49  
50  
51  
52  
53  
54  
55  
56  
57  
58  
59  
60

## Strengths and limitations

- The strengths of the trial are that it has a pre-specified sample size estimate, a primary outcome that is highly applicable to neurogenic claudication as it includes standing and walking, is multi-centred and includes health economic and qualitative evaluations. In addition to self-reported measures, the study includes physical capacity measures.
- The trial has been informed by structured patient and public involvement.
- The intervention is individually tailored and utilises group supervision to maximise the potential for cost-effectiveness.
- Due to the nature of the intervention, participants cannot be blinded to treatment allocation.

## Abstract:

Introduction: Neurogenic claudication due to spinal stenosis is common in older adults. The effectiveness of conservative interventions is not known. The study aim is to estimate the clinical and cost-effectiveness of a physiotherapist delivered, combined physical and psychological intervention.

Methods and analysis: This is a pragmatic, multi-centred randomised controlled trial. Participants are randomised to a combined physical and psychological intervention (BOOST programme) or best practice advice (control). Community-dwelling adults, 65 years and over, with neurogenic claudication are identified from community and secondary care services. Recruitment is supplemented using a primary care based cohort. Participants are registered prospectively and randomised in a 2:1 ratio (intervention:control) using a web-based service to ensure allocation concealment. The target sample size is a minimum of 402.

The BOOST programme consists of an individual assessment and twelve 90 minute classes, including education and discussion underpinned by cognitive behavioural techniques, exercises and walking circuit. During and after the classes, participants undertake home exercises and there are 2 support telephone calls to promote adherence with the exercises. Best practice advice is delivered in 1-3 sessions with a physiotherapist.

The primary outcome is the Oswestry Disability Index at 12 months. Secondary outcomes include the 6 minute walk test, Short Performance Physical Battery, Fear Avoidance Beliefs Questionnaire and Gait Self-efficacy Scale. Outcomes are measured at 6 and 12 months by researchers who are masked to treatment allocation. The primary statistical analysis will be by 'intention to treat'. There is a parallel health economic evaluation and qualitative study.

Ethics and dissemination: Ethical approval was given on the 03 March 2016 (National Research Ethics Committee number: 16/LO/0349). This protocol adheres to the SPIRIT Checklist. Results will be reported at conferences and in peer-reviewed publications using the CONSORT guidelines. A plain English summary will be published on the BOOST website.

Trial registration: ISRCTN12698674

Keywords: Neurogenic claudication, spinal stenosis, exercise, randomised controlled trial

## Introduction

Neurogenic claudication (NC) is a condition that frequently affects older adults<sup>1</sup>. The burden of symptoms is substantial. NC presents as pain, discomfort or other symptoms radiating from the spine into the buttocks and legs, which is provoked by walking or prolonged standing and relieved by sitting or lumbar flexion<sup>2</sup>. Other signs and symptoms include weakness, altered sensation, fatigue and gait changes<sup>2</sup>. Pain in the lower back is usual but not a necessary diagnostic feature. The symptoms of NC are thought to arise from pressure on nerves and blood vessels in the spinal canal caused by degenerative changes narrowing the volume of the spinal canal. Narrowing may or may not be evident on radiological imaging<sup>2,3</sup>. When narrowing is evident radiologically, the condition is termed Lumbar Spinal Stenosis (LSS). The relationship between imaging results and symptoms is inconsistent as not all people with radiological narrowing report symptoms of NC<sup>2,3</sup>.

Symptoms due to spinal stenosis are the most common reason for spinal surgery in people over 65 years of age<sup>4</sup>. However, the effectiveness of surgery is unclear, and it exposes older people to considerable risk of complications, including wound infection and cardiorespiratory problems<sup>4-6</sup>. Surgery is also expensive. Current clinical guidelines suggest that physiotherapy is an option for patients with symptoms arising from lumbar spinal stenosis before proceeding to surgery<sup>7</sup>. However, we do not know whether physiotherapy is effective, nor which physiotherapy techniques should be used<sup>8</sup>. A Cochrane systematic literature review reports that the current evidence for non-operative care for people with NC is very low to low quality<sup>9</sup>. All recent reviews agree that higher quality trials are needed<sup>9-13</sup>. Despite NC being a condition associated with older age, interventions tested to date have not targeted age-associated changes in the musculoskeletal system of participants (such as generalised sarcopenia and frailty) or the psychological impact of pain. In order to generate high quality evidence regarding non-surgical care for NC, our aim is to conduct a high quality, multi-centred, randomised controlled trial of a physiotherapist delivered combined physical and psychological intervention.

## Objectives

To estimate the clinical and cost-effectiveness of a physiotherapist delivered combined physical and psychological intervention for older adults with neurogenic claudication compared to best practice advice.

To explore whether indicators of frailty, behavioural factors and radiological (MRI) biomarkers can identify groups of participants who are more likely to respond positively to the intervention using pre-specified sub-group analyses.

To conduct a parallel, longitudinal qualitative study with a sample of trial participants to better understand participant experiences of living and ageing with NC, and to inform implementation if the intervention is successful.

## Methods/Design

### Overview

The study design is a multi-centred randomised controlled trial (RCT) with embedded qualitative study and economic evaluation (See Figure 1).

We are currently recruiting community-dwelling older adults with symptoms of neurogenic claudication. Recruitment opened on the 25<sup>th</sup> of July, 2016 and we anticipate recruitment to be completed around June 2018. Participants are identified from NHS Physiotherapy and Consultant Spinal Clinics in community and secondary care settings. In addition, participants are identified through a primary care based cohort study (The Oxford Pain, Activity and Lifestyle Survey [OPAL] cohort study). The OPAL Cohort Study is being conducted in the same localities as the trial.

The experimental intervention is a physiotherapist delivered combined physical and psychological programme. Participants attend an individual session followed by 12 group sessions. During the individual session, participants undergo an assessment and are prescribed the exercises they will carry out during the group sessions tailored to their ability, symptom presentation and general health. The group sessions consists of: 1) education and group discussion based on cognitive behavioural (CB) techniques; 2) warm up and circuit exercises; and 3) a walking circuit. The education component focuses on pain management strategies, engagement with home exercises and increasing physical activity. The exercises target muscle strength, balance and flexibility whilst the walking circuit aims to increase walking self-efficacy and mobility. The education component and supervised exercise is provided in groups of approximately 6 participants to maximise the potential for cost-effectiveness. There are two follow up phone calls on completion of the group sessions to encourage adherence with the home exercise programme.

The comparator is advice given by a physiotherapist (best practice advice), ideally in one session, but up to two further review sessions are permissible. Advice includes self-management strategies, home exercises and encouragement to increase physical activity.

Participants are randomised in a 2:1 ratio (intervention:control) and followed up for 12 months (primary endpoint).

### Eligibility

Participants are included in the trial if they fulfil the eligibility criteria listed in Table 1. In the United Kingdom, the majority of adults are registered with a primary care practice. Due to the pragmatic nature of this trial, we include people with symptoms consistent with the clinical presentation of NC rather than a diagnosis of spinal stenosis based on evidence of narrowing of the spinal canal on an MRI scan. NC presents as a cluster of symptoms easily recognised using simple self-report questions identified in a recent systematic literature review<sup>3</sup>(Table 2). These questions have excellent sensitivity and specificity for identifying NC<sup>3</sup> and are used to screen for eligible participants.

The exclusion criteria are largely related to the participant being unable to participate in the intervention, for example, if they are unable to follow instructions or mobilise short distances without assistance. Participants are not excluded on the basis of any existing co-morbidities unless their General Practitioner (GP) feels inclusion in the study places them at risk.



## Approach

Potential participants are approached via two routes:

- 1) Physiotherapy and consultant spinal clinics in community and secondary care NHS settings

Potential participants are identified by clinical staff in physiotherapy and consultant spinal clinics or from referrals. Staff are asked to identify potentially eligible patients based on age ( $\geq 65$  years) and symptoms (back and/or leg symptoms) and to screen out those on surgical waiting lists if that information is available. Clinical staff approach potentially eligible patients attending clinics, provide information about the study and ask if they are interested in being contacted by the research team. Clinical staff may also contact new referrals by telephone to inform them about the study. Potential participants who are interested and willing to be contacted by the research team are provided with a Patient Information Leaflet (PIL), and their contact details are passed to the BOOST researcher for full eligibility screening.

- 2) The OPAL Cohort Study

The OPAL Cohort study is a population based cohort study. Participants are identified from a random sample of patients aged over 65 years registered with each participating primary care practice. The OPAL cohort study is currently ongoing at 34 primary care practices, and will be described elsewhere.

Embedded within the cohort study postal questionnaires are self-report questions to identify individuals with possible NC (Table 2). During the process of consent for the cohort study, OPAL participants are asked for additional consent for the University of Oxford to provide information and an invitation to clinical trials relevant to their clinical profile. OPAL participants who fulfil the initial criteria for the BOOST Trial (Table 1) are invited to take part in eligibility screening for the trial and provided with the BOOST PIL. OPAL participants who accept the invitation for screening are then contacted by telephone for initial screening.

## Eligibility screening

Potential participants identified via NHS spinal clinics or the OPAL cohort study are telephoned by the BOOST researcher (physiotherapists or research nurses) working at each site. During this telephone call, the researcher provides further information about the trial and completes initial eligibility checks. Eligible patients are invited to attend a research clinic appointment for a full assessment. If an individual requests to undertake the initial eligibility check in person then this is arranged.

The research clinic appointment includes assessment of symptoms to ensure they are consistent with NC (using the questions in Table 2), and screening for cauda equina syndrome or signs of serious pathology requiring immediate referral for investigations. Potential participants also undertake the Abbreviated Mental Test (AMT)<sup>14</sup> to screen for cognitive impairment, which would make it difficult for a person to participate in the intervention. The AMT contains 10 items to assess orientation, registration, recall and concentration. This test can be used by any clinician and only takes 3-4 minutes to administer<sup>15</sup>. A score of 6 or below (out of 10) suggests cognitive impairment requiring further assessment and patients are advised to consult their GP<sup>15-17</sup>. A mobility assessment

1  
2  
3 is undertaken if required to ensure the participant is able to mobilise independently at least 3  
4 metres unassisted (with or without a walking aid).  
5

### 6 **Informed consent**

7 On completion of the full eligibility assessment, eligible participants are asked to provide written  
8 informed consent prior to enrolling them into the trial. The consent is taken by a researcher who has  
9 completed training in the consent procedures for the BOOST Trial.  
10

### 11 **Baseline assessment**

12 After providing consent, the participant then completes a baseline questionnaire and undergoes a  
13 clinical assessment by the researcher. Data collection is described in Table 3. There are a number of  
14 variables only collected at baseline for the purposes of providing descriptive data on the sample.  
15 The participant is weighed using digital scales wearing light, indoor clothing with their shoes  
16 removed. Weight is recorded to the nearest 0.1 kg. Height is measured using a stadiometer  
17 positioned against a wall. The participant stands on the platform, shoes removed, as upright as  
18 possible, hands by their side. The head plate of the stadiometer is lowered until it gently rests on the  
19 top of the participant's head and the height is recorded in metres from the measuring rod, to the  
20 nearest 0.001m (1mm).  
21  
22

23  
24 The participant provides self-reported data including the demographic variables listed in Table 3, co-  
25 morbidities including other pain problems (measured using the Nordic pain questionnaire<sup>18 19</sup>) and  
26 their current mobility status. Measures of mobility status include use of walking aids inside and  
27 outside and self-rated walking speed<sup>20</sup>. Change in mobility in the last year is measured using a 5  
28 point scale constructed for the trial.  
29  
30

31 The STarT Back Screening Questionnaire<sup>21</sup> is completed, allowing participants to be categorised  
32 according to their risk (low, medium or high) of developing persistent, disabling symptoms<sup>21</sup>. Self-  
33 reported psychological factors with a potential impact on outcome are also collected. These include  
34 their confidence to exercise (Exercise self-efficacy scale (short version)<sup>22</sup>) and their intention to carry  
35 out their home exercises using a question constructed for the trial (See Table 3). Participants'  
36 attitudes to the physical changes associated with ageing are measured using the Attitude to Ageing  
37 Questionnaire – physical changes subscale<sup>23</sup>.  
38  
39

40  
41 Variables collected at follow up are described in the section on outcome measures.  
42

### 43 **Imaging**

44 Alongside the RCT, there is an exploration of whether MRI scan parameters along with other  
45 baseline factors moderate response to physiotherapy treatment. Indirect visualisation by Magnetic  
46 Resonance Imaging (MRI) is the gold standard for diagnosing lumbar spinal stenosis when a patient  
47 presents with NC, and is always undertaken before surgery, but not necessarily before conservative  
48 treatment. Increasingly, GPs have open access to MRI imaging, and if MRI were predictive of  
49 response to conservative treatment this could aid GPs clinical decision making. Despite the expense,  
50 there is remarkably little evidence about whether MRI scans can guide treatment choice effectively.  
51 Research evidence indicates that the fit between symptoms and MRI changes is poor<sup>46 47</sup>. As MRI is  
52 currently the most common imaging investigation used, MRI data will be collected for all participants  
53 and we will systematically quantify the imaging characteristics. Pre-existing scans, taken in the 12  
54 months preceding randomisation, will be used where possible to reduce the need for scanning.  
55  
56  
57  
58  
59  
60

1  
2  
3 Participants will be referred for an MRI study of the lumbar spine if they have not had one in the 12  
4 months prior to randomisation. For these participants, the MRI scan will be taken after completion  
5 of other baseline data collection, and where possible before randomisation. Due to the nature of  
6 spinal stenosis we would not expect spinal parameters to change markedly over a year long period,  
7 hence, the rationale for including existing scans. Practically, it is not possible to collect all MRI data  
8 pre-baseline data collection as this may delay treatment and create unacceptable waiting times. For  
9 the sub-set of people who have MRI scans prior to randomisation we will undertake formal sub-  
10 group analysis. We will explore other aspects of the relationship between functional outcomes and  
11 scan characteristics in additional analyses (not to be reported alongside the main trial results).  
12  
13

14 Consent for referral for a new MRI or use of an existing scan is obtained at the time of consent for  
15 the trial. Existing scans are transferred to a central repository for analysis in DICOM (Digital Imaging  
16 and Communications in Medicine) format.  
17  
18

19 The MRI data collection follows the protocol typical of NHS imaging departments. This is very similar  
20 across departments and efforts have been made to standardise the protocol where significant  
21 differences were identified.  
22

23 We anticipate that a small number of participants will not have an MRI scan due to contraindications  
24 or by personal choice. Lack of an MRI scan does not exclude participants from the trial.  
25

#### 26 Imaging protocol

27  
28 The MRI scan is performed supine, with the knees supported in flexion by a small foam wedge,  
29 resulting in relaxation of the normal lumbar lordosis. Imaging is performed using a dedicated spine  
30 phased array coil.  
31

32  
33 T1 and T2 weighted sagittal imaging is followed by T2 weighted axial imaging of at least the lower  
34 three discs. The axial imaging is either taken as three separate blocks, each angulated and entered  
35 on the discs, or as a single block extending from L3 to S1.  
36

37 Imaging parameters should be near those described in Table 4. The BOOST Trial radiologist liaises  
38 with site to ensure data scans are suitable for data collection.  
39

40 MRI scans are assessed by a single observer blinded to treatment allocation. Measurement of bony  
41 canal and dural sac cross sectional area at each vertebral level allow assessment of central canal  
42 stenosis. The size of the lateral recess and neural exit foramen is measured and recorded  
43 quantitatively. The exact degree of narrowing to confirm stenosis is not well defined. In a review by  
44 Steurer et al<sup>48</sup>, a dural sac cross-sectional area of less than 100mm<sup>2</sup> was considered diagnostic of  
45 central canal stenosis. Similarly, lateral recess depth and foraminal diameter measurements of less  
46 than 3mm have been considered diagnostic of lateral recess and foramina stenosis respectively.  
47  
48

#### 49 Provision of MRI results to participants

50  
51 MRI scans requested for the purpose of the trial and not as part of a participant's clinical  
52 management are research investigations only. These are collected and assessed by the trial  
53 radiologist. If a serious spinal pathology is identified, the participant's GP and/or Spinal Consultant  
54 are immediately informed. If no serious pathology is identified then scan results will be made  
55  
56  
57  
58  
59  
60

1  
2  
3 available to participants at the end of the study if requested. MRI reports will be sent to each  
4 participant's GP or spinal consultant so that scan results are explained to the participant  
5 appropriately.  
6

## 7 **Randomisation and masking**

8 Following baseline data collection, the researcher uses a web-based service to randomise the  
9 participants. During this process, the researcher is not informed of the treatment allocation. Instead,  
10 an automated email is sent directly to the physiotherapists who provide the interventions.  
11  
12

13 The web-based randomisation service is provided by the Oxford Clinical Trials Research Unit (OCTRU)  
14 consistent with UK Clinical Research Collaboration (UKCRC) approved standard operating  
15 procedures, ensuring prospective registration and allocation concealment. Randomisation is  
16 stratified by centre, age (65-74 years and 75 years +) and gender. Participants are randomised in a  
17 2:1 ratio (intervention:control) to ensure that there are enough participants to run a group  
18 intervention and minimise waiting times.  
19  
20

21 Physiotherapists delivering the interventions and participants cannot be masked to treatment  
22 allocation. All participants receive an initial one hour appointment. For those randomised to the  
23 BOOST programme, this is an assessment prior to attending the group sessions. For those  
24 randomised to the control arm, it is their initial physiotherapy session to deliver best practice advice.  
25 During this appointment, participants are informed of their treatment allocation by the  
26 physiotherapist. To ensure that researchers collecting follow up data remain masked to treatment  
27 allocation, physiotherapists and participants are asked not to share information about treatment  
28 allocation with researchers.  
29  
30

31 The trial statistician, and the research staff undertaking quality assurance checks and the qualitative  
32 study are not blinded to treatment allocation. The remaining members of the trial management  
33 team, including all those who are involved in data management, are masked to treatment allocation.  
34  
35

## 36 **Outcome measures**

37 Follow up data is collected at 6 and 12 months after randomisation at a clinic appointment. The  
38 outcomes are listed in Table 3.  
39

### 40 *Primary outcome*

41  
42 The primary outcome is low back pain disability measured using the Oswestry Disability Index (ODI  
43 v2.1a)<sup>25,43</sup> at 12 months after randomisation. The ODI is quite widely used as a measure for NC, and  
44 very widely used in the field of back pain. A comparison of the psychometric properties of four of  
45 the most promising self-report measures for NC demonstrated that the ODI had superior properties  
46 to other measures<sup>43</sup>. It is highly applicable to NC because it includes items on standing and walking.  
47 Scores range from 0-100, with higher scores indicating greater disability.  
48  
49

### 50 *Secondary outcomes*

51  
52 A range of self-reported and physical measures are collected to evaluate the impact of the  
53 intervention on key treatment targets (symptoms of neurogenic claudication, mobility, physical  
54 activity, strength, balance, frailty and falls and cognitive and behavioural factors related to  
55 adherence with exercise and improving physical activity levels).  
56  
57

### *Self-reported measures*

Self-reported measures related to symptoms and their impact include the Swiss Spinal Stenosis Questionnaire<sup>43</sup>, global rating of change<sup>37</sup>, satisfaction with treatment using a 5 point scale constructed for the trial, health-related quality of life measured using the EQ-5D-5L<sup>27</sup>, and how well participants are managing their leg and back symptoms on a 10 point scale constructed for the trial.

Information is collected about cognitive and behavioural factors targeted during the intervention that are hypothesised to mediate effects of the intervention. Fear-avoidance is measured using the Fear Avoidance Beliefs Questionnaire<sup>36</sup>. Self-efficacy is measured from different perspectives. Participants rate their confidence to walk half a mile using a single item from the Modified Gait Self-efficacy Scale<sup>31</sup>. To understand maintenance of exercise and physical activity, drawing on theoretical and empirical literature on this topic<sup>32</sup>, participants also rate their confidence to restart their exercises having stopped them (self-efficacy recovery<sup>32 33</sup>), and their confidence to maintain their exercises in the long term (self-efficacy maintenance<sup>32 33</sup>). Measures related to the adherence of exercises and increasing physical activity are collected using the Index of Habit<sup>35</sup>, self-reported frequency of exercise and satisfaction with their attempts to increase their physical activity<sup>49</sup> measured on a 5 point scale constructed for the trial. Change in mobility in the last 6 months is measured using a 5 point scale constructed for the trial.

A range of measures are collected to capture constructs related to ageing. Frailty is measured using the Tilburg Frailty Index<sup>28</sup> and information about falls and fall related injuries is collected as recommended by the Prevention of Falls Network Europe (ProFANE)<sup>30</sup>. Beliefs about ageing are measured using the physical changes subscale of the Attitudes to Ageing Questionnaire<sup>23</sup>.

Health resource use will be collected using the Client Service Receipt Inventory<sup>45</sup>.

### *Physical assessment*

A measure of postural alignment is undertaken to quantify the degree of thoracic kyphosis<sup>38 39</sup>. The participant removes their shoes and socks and stands as upright as possible, with their sacrum and back against the wall, with hands by their sides. The researcher measures the distance from the spinous process of the seventh cervical vertebrae to the wall using a ruler. It is an alternative to the occiput to wall measurement, but reflects kyphosis better as it minimises error due to head position<sup>38 39</sup>.

We then collect measures related to mobility, balance and strength which are important targets of the intervention and markers related to ageing and frailty.

The Short Physical Performance Battery (SPPB)<sup>50</sup> measures three aspects of physical performance: standing balance, walking speed and the time taken to perform five chair stands. An overall score is given by adding the scores for each test. Researchers follow published guidance on the test which is, briefly, as follows<sup>50</sup>:

#### Standing balance

Standing balance is rated on a scale of 0-4 according to the participant's ability to maintain three test positions (side by side stance, semi-tandem and full tandem) for 10 seconds.

### Walking speed

Walking speed is measured on an eight feet long walking course with no obstructions for a further two feet at each end. The participant is instructed to “Walk to the other end of the course at your usual speed, just as if you were walking down the street to go to the shop.” The time taken for the participant to walk between the two markers is recorded to the nearest 0.1 seconds. The test is carried out twice and the faster of the two times is used to score the test on a scale of 0-4.

### Chair stands

The participant sits in a straight-backed chair with their arms folded across their chest. They are given the following instructions: “Now stand up straight 5 times in succession, as fast as you can”. The time taken to perform the 5 chair stands (from the initial sitting position to the final standing position at the end of the fifth stand) is used to score the test on a scale of 0-4. If the participant is unable to complete the test then they are given a score of 0.

The six minute walk test (6MWT)<sup>41</sup> measures the distance that the participant is able to walk in 6 minutes. The researcher marks out an indoor walking course which is flat and straight and marked with cones at each end. The length of the test track is standardised at each site to ensure that the follow-up assessments are carried out on the same length test track. The recommended length of the course is a minimum of 10m in total but it is dependent on the space available at each site.

One lap consists of walking to the turnaround point of the course and returning to the start point. All researchers were provided with a 6MWT compact disc which is played during the test and counts down the 6 minutes of the walking test while the researcher counts the number of laps with a lap counter.

Prior to starting the test, the researcher also asks the participant if they have symptoms of NC. If they do not have any symptoms when starting, the participant is asked to verbally indicate if they begin to experience symptoms during the test. The distance at which their symptoms begin is recorded by the researcher.

The researcher measures the participant’s hand grip strength<sup>40</sup> using a Jamar + Dynamometer and follows the protocol outlined by Robert et al<sup>51</sup>. The participant is seated in a chair with arms, with their hips, knees and ankles at 90°, and their feet flat on the ground. The participant’s arm is supported on the armrest with their wrists level with the end of the armrest. During the test the researcher supports the weight of the dynamometer. Using standardised instructions, the participant is instructed to squeeze the handle of the dynamometer until they reach a maximal contraction and hold for 5 seconds. The procedure is repeated on the other side. Three measurements are taken on each hand allowing at least 30 seconds rest between measurements on the same hand. The highest reading is used as the summary measure.

### Follow up procedures

All participants are invited to attend a face-to face clinic appointment at six and 12 months. This is arranged by the researcher at each site. However, if a participant is unable to attend the clinic appointment, they are mailed a questionnaire that contains the primary outcome, all self-reported



1  
2  
3 items and a participant completed version of the Client Service Receipt Inventory, but excludes the  
4 physical assessment. If the questionnaire is not returned within two weeks then a second copy of  
5 the questionnaire is sent by the BOOST Trial Office as a reminder. If this is not returned within a  
6 further two weeks, then the BOOST Trial Office carry out a reminder phone call. After another two  
7 weeks, if the questionnaire has not been returned, then the BOOST Trial Office will attempt to  
8 contact the participant by telephone and collect core outcomes consisting of the primary outcome  
9 (ODI), pain troublesomeness rating, whether they are on a waiting list for spinal surgery, EQ-5D-5L,  
10 self-rated walking ability, falls and falls related fractures, self-reported exercise adherence, and a  
11 brief version of the Client Service Receipt Inventory.  
12  
13

## 14 **Adverse events**

15  
16 A safety reporting protocol has been developed to manage the reporting of related and unexpected  
17 serious adverse events (SAEs) and directly attributable adverse event (AE). An AE is any untoward  
18 medical occurrence in a participant during a trial. There may or may not be a causal relationship with  
19 the trial intervention. AEs may be identified by the physiotherapists delivering the trial treatments or  
20 by researchers conducting follow up assessments who have been trained in reporting procedures.  
21 SAEs must be reported to the Trial Management Team within 24 hours of the physiotherapist or  
22 researcher becoming aware of the event. The Chief Investigator determines whether AEs require  
23 reporting to the Ethics Committee, Data Monitoring and Ethics Committee (DMEC) and Trial  
24 Sponsor.  
25  
26

## 27 **Training and quality assurance of the research protocol**

28  
29 Researchers undergo approximately four hours of training covering eligibility screening, consent  
30 taking and data collection. They are provided with a manual containing detailed instructions for all  
31 trial procedures. All researchers undergo a quality assurance check to ensure they are following the  
32 trial protocol. This involves a BOOST team member observing the researcher carrying out the  
33 eligibility screening, taking consent and collecting trial data. Trial paper work is checked for  
34 completeness. If any deviations from the protocol are identified then further training is provided.  
35  
36

## 37 **Study interventions**

### 38 **Control intervention- best practice advice**

39  
40 The control intervention is Best Practice Advice which is delivered in a one to one session with a  
41 physiotherapist. Participants attend an initial appointment of up to one hour consisting of an  
42 assessment followed by the provision of advice and education. Advice and education includes  
43 education about NC, being physically active, use of medications, when to seek more advice and,  
44 prescription of flexion and trunk stabilisation exercises (up to 4 exercises). The physiotherapist may  
45 prescribe a walking aid if the assessment indicates (e.g. to improve walking by increasing stability or  
46 for pain relief). Participants are provided with written information. Ideally, the control intervention  
47 should be delivered in one session. However, if there is a pressing need or safety concerns, the  
48 physiotherapists are permitted to arrange a maximum of two half hour review appointments. During  
49 these sessions they can re-enforce verbal advice given, and review walking aids or exercises  
50 provided in the initial session but are not permitted to provide treatments such as manual therapy,  
51 electrotherapy, acupuncture, hydrotherapy or structured exercise sessions.  
52  
53  
54  
55  
56  
57  
58  
59  
60

### Experimental intervention – The BOOST programme

The BOOST programme will be described in full according to the TIDIER guidance<sup>52</sup> elsewhere, including the rationale and development, but a brief summary is provided here.

Participants are invited to attend twelve 90 minutes sessions over a 12-week period. Prior to attending the programme, they attend an individual appointment (up to one hour) for an assessment and to set the participant's individualised baseline strength, balance and walking circuit targets for the group sessions.

Each session follows the same format. Participants take part in an education and discussion session, facilitated by the physiotherapist (30 minutes) and incorporating behavioural change strategies to encourage adherence with home exercises. This is followed by the exercise programme lasting approximately one hour. There is a short warm-up of seated exercises performed as a group. Then participants undertake a circuit of strengthening, stretching and balance exercises<sup>53 54</sup>. Each participant has an individualised programme. The final part of the exercise element is a supervised walking circuit, designed to improve walking ability and fitness<sup>53</sup>. The exercises carried out during the supervised sessions make up the home exercise programme (warm up, exercise circuit and walking).

Participants attend the supervised sessions twice a week initially. As they progress through the programme attendance becomes less frequent (weekly and then fortnightly). The home exercise programme is introduced during Session 5 so that participants begin to undertake their home exercise programme while supported by the physiotherapist. On completion of the 12 group session, participants are asked to carry out their home exercise programme at least twice per week so that it becomes a habitual activity.

The physiotherapist monitors progress during the programme by asking participants to rate how well they feel they are managing their condition (0-10 Numerical Rating Scale) and how their symptoms are affecting walking (walking item from the Oswestry Disability Index) at the pre-group assessment, and at Sessions 3, 6, 9 and 12. At the end of the 12 week programme the physiotherapist carries out two follow-up telephone reviews with each participant to promote long term adherence with the home exercise programme. These take place approximately one and two months after completing the supervised sessions and take approximately 15 minutes.

### Concomitant care

Participants may seek other forms of treatment during the trial if they feel it is necessary. Additional treatments accessed by participants, including contact with their GP or other health professionals, will be recorded on the Client Service Receipt Inventory<sup>45</sup> at follow up.

### Physiotherapist training and quality assurance of intervention delivery

The interventions are delivered by physiotherapists registered with the Health and Care Professionals Council. All physiotherapists delivering the BOOST programme attend a one-day training course, are provided with an intervention manual and undertake three hours online training. All physiotherapists delivering the control intervention attend three hours of training and are provided with an intervention manual.



1  
2  
3 Routine quality assurance checks are conducted. Visits are made to each site and at least one session  
4 of each intervention is observed. Feedback is provided to the physiotherapist on completion of the  
5 session and any issues or training needs identified. Another visit is arranged if substantial concerns  
6 are identified.  
7

8 A structured check list is used to monitor intervention delivery and ensure that all elements of the  
9 interventions are delivered as intended. We developed the education and discussion session of the  
10 BOOST programme with the assistance of a CB Therapist who also assisted with training. The CB  
11 Therapist helped to develop the checklist for the BOOST programme to ensure all the necessary  
12 components of the education and discussion section of the session were covered. The checklist is  
13 completed during the observed session. The education and discussion session may also be assessed  
14 via recording (depending on resources and BOOST staff capacity). All participants provide consent  
15 for sessions to be recorded for quality assurance purposes when they enrol in the study and we seek  
16 verbal consent from the physiotherapist.  
17  
18

19  
20 Following initial quality assurance checks and feedback, we also undertake fidelity assessments of  
21 both interventions that is not fed back to the physiotherapists. Feedback at this stage is not provided  
22 as we need to understand how this intervention would be delivered in the clinical setting if it were  
23 to be implemented.  
24

25  
26 A structured record of the interventions (treatment log) is completed by the physiotherapists and  
27 used to monitor fidelity. We collect attendance rates to monitor adherence with the interventions.  
28 Additional site visits will be conducted if any problems with intervention delivery are identified.  
29

### 30 **Sample size**

31 At 80% power and 5% 2-sided significance levels, the proposed sample size is 321 participants in  
32 total providing data at 12-month follow-up (214 in the intervention arm and 107 in the control arm),  
33 after which inflation for potential loss to follow-up (20%) yields an overall target of 402 (268  
34 intervention, 134 control). If power is increased to 90%, then a sample size of 429 (286 in the  
35 intervention arm and 143 in the control arm) is required, after which inflation for potential loss to  
36 follow-up (20%) yields an overall target of 540 (360 intervention, 180 control).  
37  
38

39  
40 These calculations have been based on the assumption that a between-group difference of five  
41 points is considered clinically significant on the Oswestry Disability Index (ODI), with a baseline  
42 standard deviation of 15, consistent with published estimates in older populations and those with  
43 NC<sup>55 56</sup>. This yields a standardised difference of 0.33, a moderate effect size, which is consistent  
44 with being a reasonable target for a pragmatic trial<sup>57</sup>.  
45

46  
47 The loss to follow-up of 20% has been based on recent experiences of rehabilitation trials in older  
48 adults<sup>58</sup>. We estimate that the therapist effects will be negligible from data that we have  
49 generated/published from a series of trials using similar standardised interventions. Our recent trials  
50 of hand exercises in rheumatoid arthritis and cognitive behavioural interventions in low back pain  
51 generated an Intra Cluster Correlation (ICC) of less than 0.0001<sup>59 60</sup>. We anticipate about 20  
52 therapists delivering the intervention, treating an average of 12-15 participants each. We have not  
53 incorporated a formal inflation for a therapist effect as the loss to follow-up allowance is generous,  
54 and should mitigate against any moderate to large therapist effects.  
55  
56  
57  
58  
59  
60

1  
2  
3 The sample size is a minimum of 402 participants and a maximum of 540, to be finalised following a  
4 review of the sample size assumptions (in particular any evidence of clustering or a larger baseline  
5 standard deviation) by the DMEC. A number of assumptions in the sample size estimate will be  
6 checked at this interim time point and adaptations made if needed, including the baseline standard  
7 deviation of the ODI and the observed ICC. The DMEC will review these assumptions at this time-  
8 point and make recommendations regarding the final sample size to the Trial Management Group  
9 and Programme Steering Committee. No interim analysis of the primary outcome will be performed.  
10

## 11 Analysis

12 Data will be reported in accordance with the Consolidated Standards of Reporting Trials (CONSORT)  
13 guidelines for randomised controlled trials and the appropriate extensions<sup>61</sup>. A final statistical  
14 analysis plan will be developed by the end of the recruitment period, and we provide an outline  
15 description here. The primary analysis will be 'intention to treat', where participants will be included  
16 in their randomised groups. Effect estimates together with their 95% confidence intervals will be  
17 reported. The primary outcome, ODI at 12 months, will be analysed using a linear multivariable  
18 regression multi-level method to take account of any therapist effect and adjusted for the region,  
19 baseline ODI score, stratification and important prognostic variables.  
20  
21  
22

23 Missing data will be minimised by careful data management and training. The nature and  
24 mechanism for missing variables and outcomes will be investigated, and if appropriate multiple  
25 imputation will be used. Sensitivity analyses will be undertaken, assessing the underlying missing  
26 data assumptions.  
27  
28

29 A secondary complier adjusted causal effect analysis<sup>62</sup> will explore the effect of adherence with the  
30 intervention (attendance and the participants' engagement with the programme rated by the  
31 physiotherapist<sup>63</sup>). For the purposes of the primary CACE analysis we will define adherence as  
32 attending at least 9 out of the 12 sessions (75%). This would ensure that the majority of  
33 educational/discussion content is delivered. No one session is considered more important than  
34 another regarding educational/discussion content. Core CB concepts are introduced during the  
35 earlier sessions, are re-iterated during subsequent sessions so attendance at 9 sessions would  
36 ensure all core content is covered. Attendance at nine sessions will ensure that the participant is  
37 introduced to the home exercise programme and has undertaken the exercise programme for a  
38 minimum of six weeks (Sessions 1-9 are delivered over a 6 week period). Six weeks of strength  
39 training has been shown to be sufficient to result in short term improvements in muscle strength  
40 and physical function<sup>64-66</sup>.  
41  
42  
43

44 We have also defined *a priori* subgroup criteria based on the published literature and will explore  
45 treatment effects by age (65-74 years/75 years +), gender (male/female), Tilberg Frailty Index scores  
46 (0-4/5+<sup>28</sup>), Fear Avoidance Beliefs Questionnaire scores (0-14/15+<sup>67</sup>), STartBack Risk Stratification  
47 score low/medium/high risk groups<sup>21</sup>), hand grip strength (men: <30/30+; women <20/20+<sup>68</sup>) and  
48 Short Physical Performance Battery Scores (SPPB 0-6 Low performance; SPPB 7-9 Intermediate  
49 performance; SPPB 10-12 High Performance<sup>68</sup>) Amongst participants that have an MRI scan prior to  
50 randomisation, we will estimate treatment effects in two-sub-groups defined by MRI parameters  
51 (cross-sectional spinal canal area cut-point of 100mm<sup>2</sup><sup>48</sup>). Subgroup effects will be analysed using  
52 interaction with treatment tests and will be displayed using forest plots<sup>69</sup>.  
53  
54  
55  
56  
57  
58  
59

1  
2  
3 We will carry out a series of additional exploratory sub-group and interaction analyses to identify  
4 other MRI scan parameters and baseline factors that predict change in ODI scores between baseline  
5 and 12 months. Interaction and polynomial terms will be considered when carrying out the  
6 exploratory analysis, and the analyses may be based on continuous or binary cut-points. These  
7 models will report variables that predict the outcome at 12 months with 95% confidence intervals  
8 and p-value. These additional analyses will be presented in secondary publications and with  
9 appropriate caveats about the interpretation of exploratory sub-group analyses.  
10  
11

12 Further supplementary analysis may include mediation analysis to evaluate treatment mechanisms,  
13 and exploratory analyses of exercise dose effects including profiling of treatment response  
14 trajectories. These are *a priori* analyses based on the logic model used to develop the intervention,  
15 and will examine (a) whether the intervention affects hypothesised mediators as intended, (b)  
16 whether changes in hypothesised mediators relate to changes in outcomes, and (c) whether effects  
17 of intervention on outcomes is attributable to changes in the hypothesised causal pathway.  
18  
19

### 20 **Economic evaluation**

21 A prospective economic evaluation, conducted from an NHS and personal social services (PSS)  
22 perspective, is integrated into the trial design. The economic evaluation will estimate the difference  
23 in the cost of resources used by participants in the two arms of the trial, enabling costs and  
24 consequences to be compared between alternative forms of physiotherapy. The economic  
25 assessment method will adhere to the recommendations of the NICE Reference Case<sup>70</sup>.  
26  
27

28 We will estimate the costs of delivering the intervention, including development and training, the  
29 cost of delivering sessions, and participant follow-up/management. Broader resource utilisation is  
30 captured through two principal sources: (i) participant interview administered at 6 and 12 months  
31 post-randomisation and (ii) routine health service data collection systems (Hospital Episode  
32 Statistics). Unit costs for health and social care resources will be derived from local and national  
33 sources<sup>71</sup>. Costs will be standardised to current prices where possible. Health-related quality of life  
34 will be measured at baseline and at 6 and 12 months post-randomisation using the generic EuroQol  
35 EQ-5D-5L; national tariff sets will be used to generate quality-adjusted life-years (QALYs)<sup>72-74</sup>. We will  
36 in the first instance use self-report of the EuroQol EQ-5D-5L measure. Multiple imputation methods  
37 will be used to impute missing data and avoid biases associated with complete case analysis<sup>75</sup>. The  
38 results of the economic evaluation will be expressed in terms of incremental cost per QALY gained.  
39 Non-parametric bootstrap estimation will be used to derive 95% confidence intervals for mean cost  
40 and QALY differences between the trial groups, as well as to populate a cost-effectiveness plane. A  
41 series of sensitivity analyses will be undertaken to explore the implications of uncertainty on the  
42 incremental cost-effectiveness ratios and to consider the broader issue of the generalisability of the  
43 study results. The full details of the economic evaluation will be described in the health economic  
44 analysis plan.  
45  
46  
47  
48

### 49 **Qualitative study**

50  
51 The aims of the qualitative study are to better understand participant experiences both of living and  
52 ageing with NC, and their experience of the interventions delivered during the trial. Understanding  
53 the experiences of the participants will inform strategies for implementation if the intervention is  
54 clinically effective.  
55  
56  
57  
58  
59  
60

1  
2  
3 All participants recruited to the trial are eligible. As part of the consent process for the trial,  
4 participants are informed about the interview study and asked if they are willing to be contacted by  
5 a researcher to receive more information. Participants who agree are provided with an additional  
6 information sheet and contacted by the qualitative research team. Prior to starting the first  
7 interview, written consent is sought. Consent is reaffirmed verbally prior to each follow up  
8 telephone interviews.  
9

10 We are interviewing participants at three time points over the course of the trial in order to capture  
11 physical, psychological, social and contextual change. Topics explored include current impact of NC  
12 on day-to-day life and wellbeing, beliefs about the role of exercise in ameliorating symptoms, the  
13 role of exercise on slowing/reversing physical decline, and how these beliefs impact on adherence to  
14 the treatments.  
15

16  
17 We estimate 60 participants will be required to ensure data saturation is reached in all three  
18 interviews whilst ensuring diversity of participants by age, gender, ethnicity, and intervention arm,  
19 allowing for attrition over the course of the study<sup>76 77</sup>. In any one recruitment site interview  
20 participants are recruited consecutively, and as recruitment proceeds sampling is adjusted to ensure  
21 diversity of age, gender, ethnicity and intervention arm.  
22  
23

24 Interviews are semi-structured using pre-specified open-ended questions. The interviewer uses  
25 prompts to further investigate responses, and allows the participant to explore topics they feel are  
26 relevant<sup>76 78</sup>. The first interview takes place at a location convenient to the participant, usually their  
27 home. The second and third interviews are telephone interviews to reduce resource implications for  
28 the project. However, if a telephone conversation is unfeasible (e.g. poor hearing) then subsequent  
29 interviews are conducted face-to-face.  
30  
31

32  
33 The first interview takes place between randomisation and starting treatment. Participants do not  
34 yet know their treatment allocation. Questions focus on the impact of NC on the participant's  
35 physical and psychosocial health, their beliefs around exercise and ageing, and concerns and hopes  
36 regarding the intervention. The interview takes up to 90 minutes, and is audio recorded.  
37

38 The second interview is approximately one month after completing treatment. Topics explored  
39 include the participant's experiences of the intervention, adherence to home exercises, and any  
40 changes in their symptoms, exercise and aging beliefs, physical activity levels, or life circumstances.  
41 The third interview coincides with the 12-month follow-up assessment and further explores these  
42 topics, and how they may have changed after an extended period of self-management. Interview  
43 schedules are adapted to account for data captured in earlier interviews, and the interviewer has  
44 access to the outcome measures for each interviewee for exploration during the interview. The  
45 telephone interviews are recorded, and real-time notes are taken by the interviewer.  
46  
47

48  
49 Audio recordings of first interviews are transcribed verbatim by an independent transcriber,  
50 anonymised and allocated an ID number. The telephone interview notes are checked against the  
51 audio-recordings, and linked to the first interview through the ID number. Participants are sent a  
52 copy of the transcripts if requested, and may delete any information they would not like to be used.  
53

54 All transcripts are imported into NVivo and analysed using thematic analysis<sup>79</sup>. Coding is undertaken  
55 as each transcript is received. We will undertake cross-case analysis<sup>80</sup> To understand trajectories of  
56  
57

1  
2  
3 change in relation to back pain and NC we will undertake longitudinal case comparative analysis, an  
4 approach to analysis used previously by the research team<sup>81</sup>.  
5

### 6 **Trial management**

7 This trial is run by a UKCRC fully registered clinical trials unit, according to approved and audited  
8 standard operating procedures. All trial staff undergo regular training to ensure they are compliant  
9 with Good Clinical Practice and other relevant legislation and the requirements such as the Data  
10 Protection Act.  
11

### 12 **Data management and checking**

13 All data is processed according to the Data Protection Act 1998 and all documents are stored safely  
14 in confidential conditions. Each participant is provided with a unique trial identification number.  
15 Data is entered manually onto the trial database (OpenClinica). The BOOST Trial Office review all  
16 data collection forms for completeness and accuracy using automated validation checks, querying  
17 missing and nonsensical data with sites, according to trial specific procedures which have been  
18 developed to ensure data quality.  
19

### 20 **Ethics and dissemination**

21 Ethics approval for the BOOST trial was given by the National Research Ethics Committee (REC  
22 number 16/LO/0349), on 03 March 2016. Site specific approvals were provided by NHS Research and  
23 Development Departments at each participating site. The Chief Investigator will submit and, where  
24 necessary, obtain approval from the above parties for all substantial amendments to the original  
25 approved documents.  
26

27 There were several ethical issues when designing this study. A study of older adults may identify  
28 individuals with previously unidentified cognitive impairment. As part of the screening process,  
29 participants complete the Abbreviated Mental Test. Individuals with a score of 6 or below (out of 10)  
30 are excluded as this suggests impaired cognitive function requiring further assessment<sup>15-17</sup>. The  
31 researchers, conducting the eligibility screening, are trained to deal with this and to recommend that  
32 the person visit their GP to for further assessment.  
33

34 The study screening procedures may identify individuals who have signs of serious spinal pathology  
35 (e.g. cauda equina syndrome). In this case, the researcher would discuss it with the participant and  
36 as soon as possible with the local Principal Investigator and/or patient's spinal consultant or GP and  
37 take appropriate action.  
38

39 Some participants will undergo an MRI scan as a research investigation. Some participants may want  
40 the results of their scan. However, as participants would not have had access to a scan as part of  
41 their routine NHS care, we will only make results available at the end of the trial unless we detect a  
42 serious spinal pathology (e.g. spinal malignancy). In this situation, the participant's GP or Spinal  
43 Consultant will be informed immediately. If we were to provide the scan results, this may influence  
44 the beliefs of participants and their clinicians about the value of different treatments. This process is  
45 made clear to potential participants during the recruitment and consent procedures so participants  
46 understand the purpose of the MRI scan.  
47

48 The Programme Steering Committee (PSC) provides overall supervision of this research on behalf of  
49 the funder. It is comprised of the Chief Investigator, Project Lead, Trial Manager, Statistician and four  
50  
51  
52  
53  
54

1  
2  
3 independent members (including the committee chair). The PSC monitors trial progress and conduct  
4 and provides expert advice. In addition, a DMEC has been appointed. The DMEC consists of three  
5 independent experts with relevant clinical research and statistical experience. The DMEC has  
6 adopted a DAMOCLES charter<sup>82</sup> which defines its terms of reference and operation in relation to  
7 oversight of the trial. No interim outcome analysis is planned. Direct access to research data will be  
8 granted to authorised representatives of the Sponsor (University of Oxford), regulatory authorities  
9 or the host institution for monitoring and/or auditing of the study to ensure compliance with  
10 regulations.  
11  
12

13 The results will be published in a peer-reviewed journal and at conferences as well as in a report to  
14 the funder. A plain English summary will be made available on the BOOST website for participants  
15 (<https://boost.octru.ox.ac.uk/>).  
16  
17

### 18 **Contributors**

19 EW is the lead author of this manuscript. LW, SD, KV, RG, SP and SL were involved in writing the  
20 manuscript. All authors have read and approved the final manuscript. SL is the Chief Investigator and  
21 the guarantor. EW, FG, SP, CH, NA, KB, JB, GC, JF, JF, DF, ZH and CM are co-applicants on the grant  
22 awarded by the NIHR Programme Grants for Applied Research (reference: PTC-RP-PG-0213-20002)  
23 and were involved in the design of the study and its implementation, as were AG as trial manager,  
24 AM as a research associate, SD and KV as trial statisticians, GB and VG as research physiotherapists,  
25 LW as the postdoctoral researcher responsible for the qualitative study, RG as the clinical research  
26 fellow (radiology) and BP as the trial health economist.  
27  
28  
29

### 30 **Funding**

31 This research is funded by the NIHR Programme Grants for Applied Research (reference: PTC-RP-PG-  
32 0213-20002). Preparatory work for the programme of research was supported by the Collaboration  
33 for Leadership in Applied Health Research and Care Oxford at Oxford Health NHS Foundation Trust.  
34 SL and EW receive funding from the Collaboration for Leadership in Applied Health Research and  
35 Care Oxford at Oxford Health NHS Foundation Trust and are supported by the NIHR Biomedical  
36 Research Centre, Oxford. CDM is funded by the NIHR Collaborations for Leadership in Applied Health  
37 Research and Care West Midlands, the NIHR School for Primary Care Research and a NIHR Research  
38 Professorship in General Practice (NIHR-RP-2014-04-026).  
39  
40  
41

### 42 **Disclaimer**

43 The views expressed are those of the author(s) and not necessarily those of the NHS, the NIHR or the  
44 Department of Health. The trial sponsor is the University of Oxford. The sponsor has no role in the  
45 trial design; collection, management, analysis or interpretation of data; writing of reports and  
46 submission for publication.  
47  
48

### 49 **Competing interests**

50 None declared.  
51

### 52 **Provenance and peer review**

53 This protocol was peer reviewed for ethical and funding approval prior to submission.  
54  
55  
56  
57  
58  
59  
60



## Data sharing statement

The relevant anonymised patient level data will be made available on reasonable request from the authors following full reporting of the trial results and planned additional analyses.

## References

1. Ishimoto Y, Yoshimura N, Muraki S, et al. Prevalence of symptomatic lumbar spinal stenosis and its association with physical performance in a population-based cohort in Japan: the Wakayama Spine Study. *Osteoarthritis Cartilage* 2012;20(10):1103-8. doi: 10.1016/j.joca.2012.06.018
2. Suri P, Rainville J, Kalichman L, et al. Does this older adult with lower extremity pain have the clinical syndrome of lumbar spinal stenosis? *JAMA* 2010;304(23):2628-36. doi: 10.1001/jama.2010.1833
3. de Schepper EI, Overvest GM, Suri P, et al. Diagnosis of Lumbar Spinal Stenosis: An Updated Systematic Review of the Accuracy of Diagnostic Tests. *Spine (Phila Pa 1976)* 2013;38(8):E469-E81. doi: 10.1097/BRS.0b013e31828935ac
4. Deyo RA, Mirza SK, Martin BI, et al. Trends, major medical complications, and charges associated with surgery for lumbar spinal stenosis in older adults. *JAMA* 2010;303(13):1259-65. doi: 10.1001/jama.2010.338
5. Kovacs FM, Urrútia G, Alarcón JD. Surgery versus conservative treatment for symptomatic lumbar spinal stenosis: a systematic review of randomized controlled trials. *Spine (Phila Pa 1976)* 2011;36(20):E1335-51. doi: 10.1097/BRS.0b013e31820c97b1
6. Zaina F, Tomkins-Lane C, Carragee E, et al. Surgical versus non-surgical treatment for lumbar spinal stenosis. *Cochrane Database Syst Rev* 2016(1):Cd010264. doi: 10.1002/14651858.CD010264.pub2 [published Online First: 2016/01/30]
7. Kreiner DS, Shaffer WO, Baisden J, et al. Evidence-based clinical guidelines for multidisciplinary spine care: diagnosis and treatment of degenerative lumbar spinal stenosis: North American Spine Society, 2011.
8. Comer C, Redmond AC, Bird HA, et al. A home exercise programme is no more beneficial than advice and education for people with neurogenic claudication: results from a randomised controlled trial. *PLoS One* 2013;8(9):e72878. doi: 10.1371/journal.pone.0072878
9. Ammendolia C, Stuber KJ, Rok E, et al. Nonoperative treatment for lumbar spinal stenosis with neurogenic claudication. *Cochrane Database Syst Rev* 2013;8:CD010712. doi: 10.1002/14651858.CD010712
10. May S, Comer C. Is surgery more effective than non-surgical treatment for spinal stenosis, and which non-surgical treatment is more effective? A systematic review. *Physiotherapy* 2013;99:12-20. doi: 10.1016/j.physio.2011.12.004
11. Jarrett MS, Orlando JF, Grimmer-Somers K. The effectiveness of land based exercise compared to decompressive surgery in the management of lumbar spinal-canal stenosis: a systematic review. *BMC Musculoskelet Disord* 2012;13:30. doi: 10.1186/1471-2474-13-30
12. Iversen M, Choudhary V, Patel S. Therapeutic exercise and manual therapy for person with lumbar spinal stenosis. *Int J Clin Rheumatol* 2010;5(4):425-37.
13. Macedo LG, Hum A, Kuleba L, et al. Physical Therapy Interventions for Degenerative Lumbar Spinal Stenosis: A Systematic Review. *Phys Ther* 2013 doi: 10.2522/ptj.20120379
14. Qureshi KN, Hodkinson HM. Evaluation of a ten-question mental test in the institutionalized elderly. *Age Ageing* 1974;3(3):152-7. [published Online First: 1974/08/01]
15. Sheehan B. Assessment scales in dementia. *Ther Adv Neurol Disord* 2012;5(6):349-58. doi: 10.1177/1756285612455733 [published Online First: 2012/11/10]

16. Foroughan M, Wahlund LO, Jafari Z, et al. Validity and reliability of Abbreviated Mental Test Score (AMTS) among older Iranian. *Psychogeriatrics* 2017 doi: 10.1111/psyg.12276 [published Online First: 2017/06/08]
17. Sarasqueta C, Bergareche A, Arce A, et al. The validity of Hodkinson's Abbreviated Mental Test for dementia screening in Guipuzcoa, Spain. *Eur J Neurol* 2001;8(5):435-40. [published Online First: 2001/09/14]
18. Kuorinka I, Jonsson B, Kilbom A, et al. Standardised Nordic questionnaires for the analysis of musculoskeletal symptoms. *Appl Ergon* 1987;18(3):233-7. [published Online First: 1987/09/01]
19. Parsons S, Breen A, Foster NE, et al. Prevalence and comparative troublesomeness by age of musculoskeletal pain in different body locations. *Fam Pract* 2007;24(4):308-16. doi: 10.1093/fampra/cmm027 [published Online First: 2007/07/03]
20. Syddall HE, Westbury LD, Cooper C, et al. Self-reported walking speed: a useful marker of physical performance among community-dwelling older people? *J Am Med Dir Assoc* 2015;16(4):323-8. doi: 10.1016/j.jamda.2014.11.004 [published Online First: 2014/12/20]
21. Hill JC, Dunn KM, Lewis M, et al. A primary care back pain screening tool: identifying patient subgroups for initial treatment. *Arthritis Rheum* 2008;59(5):632-41. doi: 10.1002/art.23563 [published Online First: 2008/04/29]
22. Resnick B, Jenkins LS. Testing the reliability and validity of the Self-Efficacy for Exercise scale. *Nurs Res* 2000;49(3):154-9. [published Online First: 2000/07/06]
23. Laidlaw K, Power MJ, Schmidt S. The Attitudes to Ageing Questionnaire (AAQ): development and psychometric properties. *Int J Geriatr Psychiatry* 2007;22(4):367-79. doi: 10.1002/gps.1683 [published Online First: 2006/10/20]
24. Guralnik JM, Fried LP, Simonsick EM, et al. The Women's Health and Aging Study: Health and Social Characteristics of Older Women with Disability. Bethesda, MD: National Institute of Aging, 1995.
25. Fairbank JC. Why are there different versions of the Oswestry Disability Index? *J Neurosurg Spine* 2014;20(1):83-6. doi: 10.3171/2013.9.spine13344 [published Online First: 2013/11/12]
26. Parsons S, Carnes D, Pincus T, et al. Measuring troublesomeness of chronic pain by location. *BMC Musculoskelet Disord* 2006;7:34. doi: 10.1186/1471-2474-7-34 [published Online First: 2006/04/07]
27. Herdman M, Gudex C, Lloyd A, et al. Development and preliminary testing of the new five-level version of EQ-5D (EQ-5D-5L). *Qual Life Res* 2011;20(10):1727-36. doi: 10.1007/s11136-011-9903-x
28. Gobbens RJ, van Assen MA, Luijkx KG, et al. The Tilburg Frailty Indicator: psychometric properties. *J Am Med Dir Assoc* 2010;11(5):344-55. doi: 10.1016/j.jamda.2009.11.003
29. Shuval K, Kohl HW, 3rd, Bernstein I, et al. Sedentary behaviour and physical inactivity assessment in primary care: the Rapid Assessment Disuse Index (RADI) study. *Br J Sports Med* 2014;48(3):250-5. doi: 10.1136/bjsports-2013-092901 [published Online First: 2013/10/23]
30. Lamb SE, Jørstad-Stein EC, Hauer K, et al. Development of a common outcome data set for fall injury prevention trials: the Prevention of Falls Network Europe consensus. *J Am Geriatr Soc* 2005;53(9):1618-22. doi: 10.1111/j.1532-5415.2005.53455.x
31. Newell AM, VanSwearingen JM, Hile E, et al. The modified Gait Efficacy Scale: establishing the psychometric properties in older adults. *Phys Ther* 2012;92(2):318-28. doi: 10.2522/ptj.20110053 [published Online First: 2011/11/15]
32. Kassavou A, Turner A, Hamborg T, et al. Predicting maintenance of attendance at walking groups: Testing constructs from three leading maintenance theories. *Health Psychol* 2014;33(7):752-6. doi: 10.1037/hea0000015 [published Online First: 2013/11/20]
33. Luszczynska A, Schwarzer R, Lippke S, et al. Self-efficacy as a moderator of the planning-behaviour relationship in interventions designed to promote physical activity. *Psychol*



- 1  
2  
3 *Health* 2011;26(2):151-66. doi: 10.1080/08870446.2011.531571 [published Online  
4 First: 2011/02/15]
- 5 34. Fishbein M, Ajzen I. Predicting and changing behavior: The reasoned action approach. New  
6 York: Psychology Press 2010.
- 7 35. Verplanken B, Orbell S. Reflections on Past Behavior: A Self-Report Index of Habit Strength. *J  
8 33* 2003;6:1313-30.
- 9 36. Waddell G, Newton M, Henderson I, et al. A Fear-Avoidance Beliefs Questionnaire (FABQ)  
10 and the role of fear-avoidance beliefs in chronic low back pain and disability. *Pain*  
11 1993;52(2):157-68.
- 12 37. Kamper SJ, Maher CG, Mackay G. Global rating of change scales: a review of strengths and  
13 weaknesses and considerations for design. *J Man Manip Ther* 2009;17(3):163-70.
- 14 38. Wongsu S, Amatachaya P, Saengsuwan J, et al. Concurrent Validity of Occiput-Wall Distance  
15 to Measure Kyphosis in Communities. *J Clin Trials* 2012;2(2)
- 16 39. Viitanen JV, Heikkilä S, Kokko ML, et al. Clinical assessment of spinal mobility measurements  
17 in ankylosing spondylitis: a compact set for follow-up and trials? *Clin Rheumatol*  
18 2000;19(2):131-7. [published Online First: 2000/05/03]
- 19 40. Roberts HC, Syddall HE, Cooper C, et al. Is grip strength associated with length of stay in  
20 hospitalised older patients admitted for rehabilitation? Findings from the Southampton  
21 grip strength study. *Age Ageing* 2012;41(5):641-6. doi: 10.1093/ageing/afs089
- 22 41. Bennell K, Dobson F, Hinman R. Measures of Physical Performance Assessments. *Arthritis*  
23 *Care and Research* 2011;63(S11):S350-S70.
- 24 42. Guralnik JM, Ferrucci L, Pieper CF, et al. Lower extremity function and subsequent disability:  
25 consistency across studies, predictive models, and value of gait speed alone compared  
26 with the short physical performance battery. *J Gerontol A Biol Sci Med Sci*  
27 2000;55(4):M221-31. [published Online First: 2000/05/16]
- 28 43. Cleland JA, Whitman JM, Houser JL, et al. Psychometric properties of selected tests in  
29 patients with lumbar spinal stenosis. *Spine J* 2012;12(10):921-31. doi:  
30 10.1016/j.spinee.2012.05.004
- 31 44. Pratt RK, Fairbank JC, Virr A. The reliability of the Shuttle Walking Test, the Swiss Spinal  
32 Stenosis Questionnaire, the Oxford Spinal Stenosis Score, and the Oswestry Disability  
33 Index in the assessment of patients with lumbar spinal stenosis. *Spine (Phila Pa 1976)*  
34 2002;27(1):84-91.
- 35 45. Beecham J, Knapp M. Costing psychiatric interventions: Gaskell London 2001.
- 36 46. Moon ES, Kim HS, Park JO, et al. Comparison of the predictive value of myelography,  
37 computed tomography and MRI on the treadmill test in lumbar spinal stenosis. *Yonsei*  
38 *Med J* 2005;46(6):806-11.
- 39 47. Ishimoto Y, Yoshimura N, Muraki S, et al. Associations between radiographic lumbar spinal  
40 stenosis and clinical symptoms in the general population: the Wakayama Spine Study.  
41 *Osteoarthritis Cartilage* 2013;21(6):783-8. doi: 10.1016/j.joca.2013.02.656
- 42 48. Steurer J, Roner S, Gnannt R, et al. Quantitative radiologic criteria for the diagnosis of lumbar  
43 spinal stenosis: a systematic literature review. *BMC Musculoskelet Disord* 2011;12:175.  
44 doi: 10.1186/1471-2474-12-175 [published Online First: 2011/07/28]
- 45 49. Rothman AJ, Baldwin AS, Hertel AW, et al., editors. *Self-Regulation and Behavior Change:  
46 Disentangling Behavioral Initiation and Behavioral Maintenance*. New York: Guilford  
47 Press, 2011.
- 48 50. Guralnik JM, Simonsick EM, Ferrucci L, et al. A short physical performance battery assessing  
49 lower extremity function: association with self-reported disability and prediction of  
50 mortality and nursing home admission. *J Gerontol* 1994;49(2):M85-94. [published  
51 Online First: 1994/03/01]
- 52 51. Roberts HC, Denison HJ, Martin HJ, et al. A review of the measurement of grip strength in  
53 clinical and epidemiological studies: towards a standardised approach. *Age Ageing*  
54 2011;40(4):423-9. doi: 10.1093/ageing/afr051 [published Online First: 2011/06/01]
- 55  
56  
57  
58  
59  
60

- 1  
2  
3 52. Hoffmann TC, Glasziou PP, Boutron I, et al. Better reporting of interventions: template for  
4 intervention description and replication (TIDieR) checklist and guide. *Bmj*  
5 2014;348:g1687. doi: 10.1136/bmj.g1687 [published Online First: 2014/03/13]
- 6 53. Physical activity programs and behavior counseling in older adult populations. *Med Sci*  
7 *Sports Exerc* 2004;36(11):1997-2003. [published Online First: 2004/10/30]
- 8 54. Byrne C, Faure C, Keene DJ, et al. Ageing, Muscle Power and Physical Function: A Systematic  
9 Review and Implications for Pragmatic Training Interventions. *Sports Med*  
10 2016;46(9):1311-32. doi: 10.1007/s40279-016-0489-x
- 11 55. Whitman JM, Flynn TW, Childs JD, et al. A comparison between two physical therapy  
12 treatment programs for patients with lumbar spinal stenosis: a randomized clinical trial.  
13 *Spine (Phila Pa 1976)* 2006;31(22):2541-9. doi: 10.1097/01.brs.0000241136.98159.8c
- 14 56. Pua YH, Cai CC, Lim KC. Treadmill walking with body weight support is no more effective  
15 than cycling when added to an exercise program for lumbar spinal stenosis: a  
16 randomised controlled trial. *Aust J Physiother* 2007;53(2):83-9.
- 17 57. Altman D. Practical statistics for medical research. London: Chapman & Hall/CRC 1991.
- 18 58. Lamb SE, Williamson EM, Heine PJ, et al. Exercises to improve function of the rheumatoid  
19 hand (SARAH): a randomised controlled trial. *Lancet* 2014 doi: 10.1016/s0140-  
20 6736(14)60998-3 [published Online First: 2014/10/14]
- 21 59. Williams MA, Williamson EM, Heine PJ, et al. Strengthening And stretching for Rheumatoid  
22 Arthritis of the Hand (SARAH). A randomised controlled trial and economic evaluation.  
23 *Health Technol Assess* 2015;19(19):1-222. doi: 10.3310/hta19190 [published Online  
24 First: 2015/03/10]
- 25 60. Lamb SE, Lall R, Hansen Z, et al. A multicentred randomised controlled trial of a primary  
26 care-based cognitive behavioural programme for low back pain. The Back Skills Training  
27 (BeST) trial. *Health Technol Assess* 2010;14(41):1-253, iii-iv. doi: 10.3310/hta14410
- 28 61. Schulz KF, Altman DG, Moher D, et al. CONSORT 2010 Statement: updated guidelines for  
29 reporting parallel group randomised trials. *BMC Med* 2010;8:18. doi: 10.1186/1741-  
30 7015-8-18
- 31 62. Dunn G, Maracy M, Dowrick C, et al. Estimating psychological treatment effects from a  
32 randomised controlled trial with both non-compliance and loss to follow-up. *Br J*  
33 *Psychiatry* 2003;183:323-31.
- 34 63. Bellg AJ, Borrelli B, Resnick B, et al. Enhancing treatment fidelity in health behavior change  
35 studies: best practices and recommendations from the NIH Behavior Change  
36 Consortium. *Health Psychol* 2004;23(5):443-51. doi: 10.1037/0278-6133.23.5.443  
37 [published Online First: 2004/09/16]
- 38 64. Emerson NS, Stout JR, Fukuda DH, et al. Resistance training improves capacity to delay  
39 neuromuscular fatigue in older adults. *Arch Gerontol Geriatr* 2015;61(1):27-32. doi:  
40 10.1016/j.archger.2015.04.002 [published Online First: 2015/05/10]
- 41 65. Scanlon TC, Fragala MS, Stout JR, et al. Muscle architecture and strength: adaptations to  
42 short-term resistance training in older adults. *Muscle Nerve* 2014;49(4):584-92. doi:  
43 10.1002/mus.23969 [published Online First: 2013/07/31]
- 44 66. Fragala MS, Fukuda DH, Stout JR, et al. Muscle quality index improves with resistance  
45 exercise training in older adults. *Exp Gerontol* 2014;53:1-6. doi:  
46 10.1016/j.exger.2014.01.027 [published Online First: 2014/02/11]
- 47 67. Crombez G, Vlaeyen JW, Heuts PH, et al. Pain-related fear is more disabling than pain itself:  
48 evidence on the role of pain-related fear in chronic back pain disability. *Pain* 1999;80(1-  
49 2):329-39.
- 50 68. Cruz-Jentoft AJ, Baeyens JP, Bauer JM, et al. Sarcopenia: European consensus on definition  
51 and diagnosis: Report of the European Working Group on Sarcopenia in Older People.  
52 *Age Ageing* 2010;39(4):412-23. doi: 10.1093/ageing/afq034 [published Online First:  
53 2010/04/16]
- 54 69. Brookes ST, Whitley E, Peters TJ, et al. Subgroup analyses in randomised controlled trials:  
55 quantifying the risks of false-positives and false-negatives. *Health Technol Assess*  
56 2001;5(33):1-56. [published Online First: 2001/11/10]
- 57  
58  
59

- 1  
2  
3 70. NICE. Guide to the methods of technology appraisal In: Excellence NifHaC, ed.: NICE, 2013.  
4 71. Graves N, Walker D, Raine R, et al. Cost data for individual patients included in clinical  
5 studies: no amount of statistical analysis can compensate for inadequate costing  
6 methods. *Health Econ* 2002;11(8):735-9. doi: 10.1002/hec.683  
7 72. Dolan P. Modeling valuations for EuroQol health states. *Med Care* 1997;35(11):1095-108.  
8 73. van Hout B, Janssen MF, Feng YS, et al. Interim scoring for the EQ-5D-5L: mapping the EQ-  
9 5D-5L to EQ-5D-3L value sets. *Value Health* 2012;15(5):708-15. doi:  
10 10.1016/j.jval.2012.02.008  
11 74. Brazier J, Roberts J, Deverill M. The estimation of a preference-based measure of health from  
12 the SF-36. *J Health Econ* 2002;21(2):271-92.  
13 75. Sterne JA, White IR, Carlin JB, et al. Multiple imputation for missing data in epidemiological  
14 and clinical research: potential and pitfalls. *BMJ* 2009;338:b2393.  
15 76. Britten N. Qualitative interviews in medical research. *BMJ* 1995;311(6999):251-3.  
16 77. Morse JM. Determining sample size. *Qualitative Health Research* 2000;10(1):3-5.  
17 78. Cohen D, Crabtree B. Semi-structured Interviews. Qualitative research guidelines project,  
18 2006.  
19 79. Braun V, Clarke V. Using thematic analysis in psychology. *Qualitative Research in Psychology*  
20 2006;3(2):77-101.  
21 80. Miles M, Huberman A. Qualitative data analysis. Second edition ed. Thousand Oaks: SAGE  
22 Publications Ltd 1994.  
23 81. Griffiths F, Borkan J, Byrne D, et al. Time, complexity and chronic back pain: a longitudinal  
24 qualitative study.: North America Primary Care Research Group., 2009.  
25 82. DAMOCLES-Study-Group. A proposed charter for clinical trial data monitoring committees:  
26 helping them to do their job well. *Lancet* 2005;365(9460):711-22. doi: 10.1016/s0140-  
27 6736(05)17965-3 [published Online First: 2005/02/22]  
28  
29  
30  
31  
32  
33  
34  
35  
36  
37  
38  
39  
40  
41  
42  
43  
44  
45  
46  
47  
48  
49  
50  
51  
52  
53  
54  
55  
56  
57  
58  
59  
60

Figure 1: Study flow chart

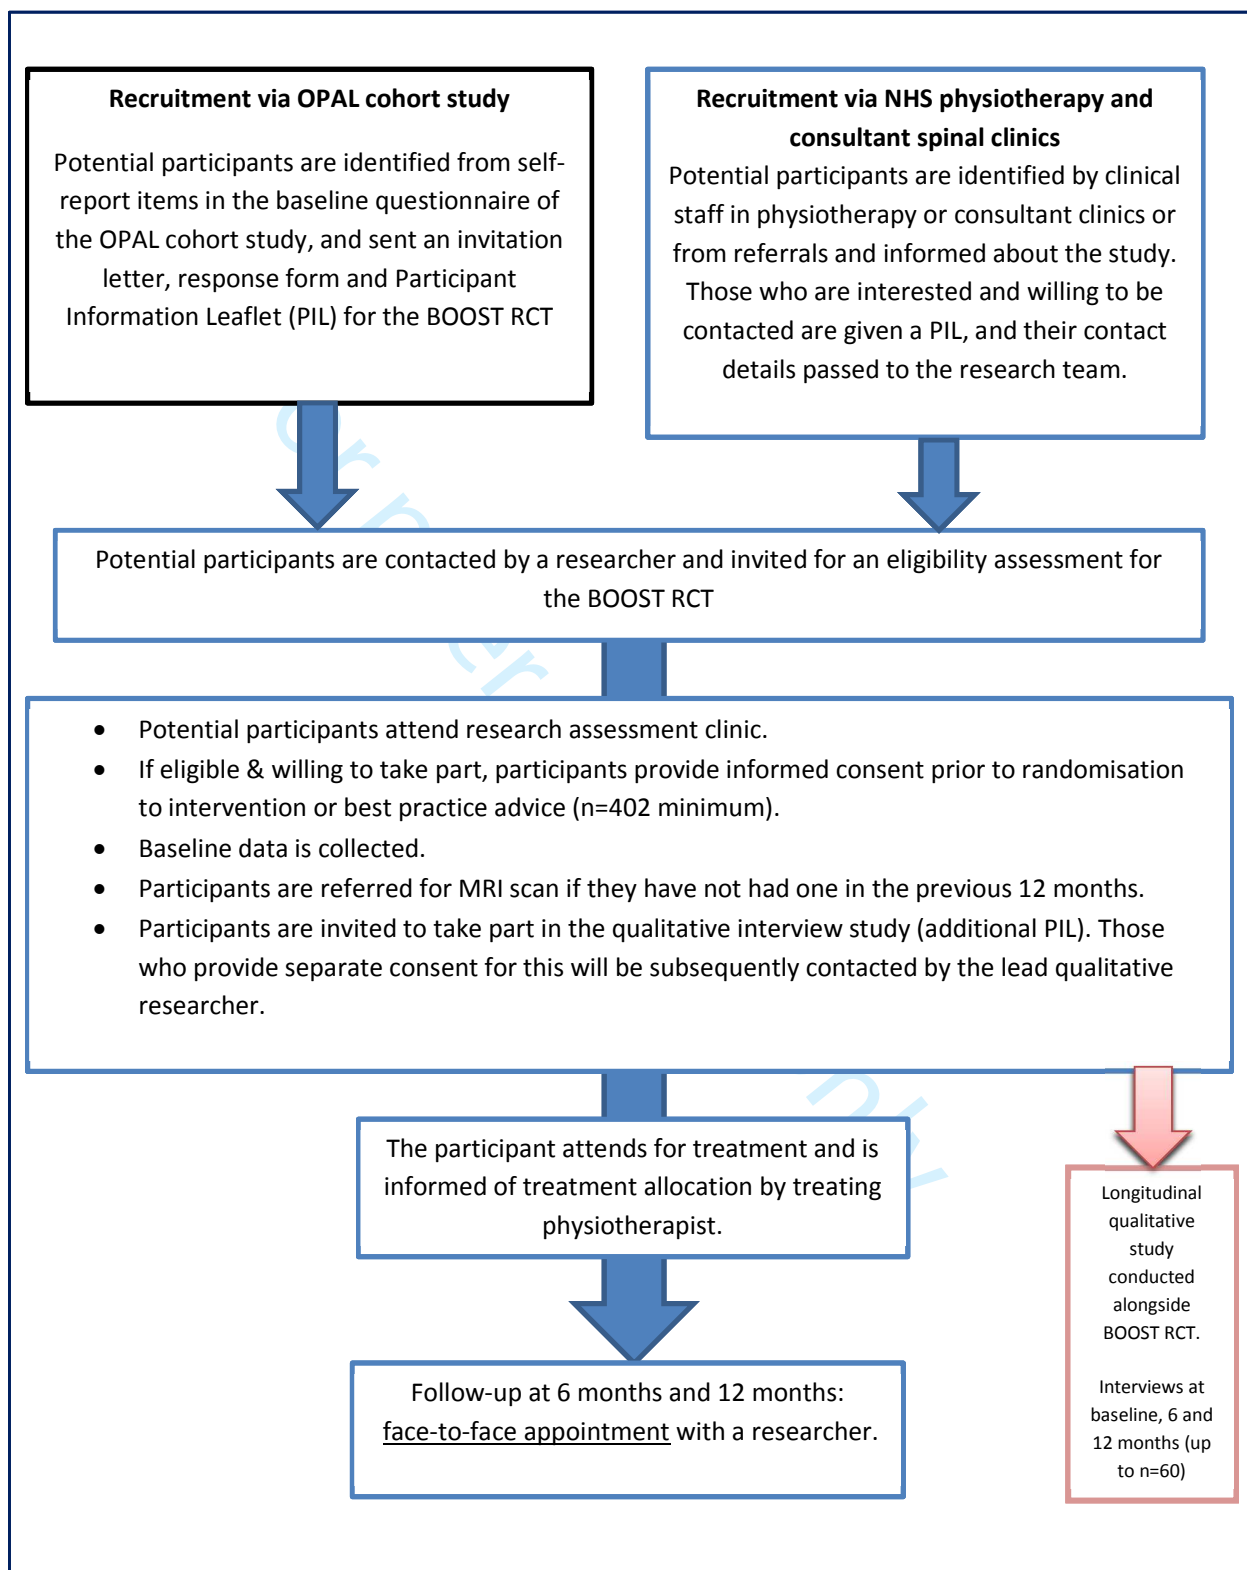

**Table 1: Eligibility criteria**

|                                                                                                                                                                                                                                                                                                                                                                                                                                                                                                                                                                                                                                                                                                                                                                                                                                                                                                                                                                                                                                                                                                                                                                            |
|----------------------------------------------------------------------------------------------------------------------------------------------------------------------------------------------------------------------------------------------------------------------------------------------------------------------------------------------------------------------------------------------------------------------------------------------------------------------------------------------------------------------------------------------------------------------------------------------------------------------------------------------------------------------------------------------------------------------------------------------------------------------------------------------------------------------------------------------------------------------------------------------------------------------------------------------------------------------------------------------------------------------------------------------------------------------------------------------------------------------------------------------------------------------------|
| <b>Inclusion criteria</b> <ol style="list-style-type: none"><li>1. Registered with a primary care practice</li><li>2. 65 years and over</li><li>3. Participant is willing and able to give informed consent for participation in the RCT</li><li>4. Reports symptoms consistent with NC</li></ol>                                                                                                                                                                                                                                                                                                                                                                                                                                                                                                                                                                                                                                                                                                                                                                                                                                                                          |
| <b>Exclusion criteria</b> <ol style="list-style-type: none"><li>1. Living in a residential care or nursing home</li><li>2. Has a terminal condition with a life expectancy of less than 6 months</li><li>3. Any substantial health or social concern that, in the opinion of the patient's general practitioner, would place the patient at increased risk or inability to participate including known inability to provide informed consent e.g. Dementia.</li><li>4. Unable to walk three metres (width of a small room) without the help of another person</li><li>5. On a surgical waiting list</li><li>6. Presents with cauda equina syndrome or signs of serious pathology requiring immediate referral for investigations</li><li>7. Cognitive impairment (defined as an Abbreviated Mental Test score of 6 or less)</li><li>8. Registered blind</li><li>9. Unable to follow verbal instructions which would make participation in the experimental treatment arm of the trial impractical, for reasons including severe hearing impairment not corrected by a hearing aid or inability to follow simple safety instructions (e.g. English comprehension)</li></ol> |

**Table 2 – Screening questions from the OPAL Cohort Study Questionnaire<sup>3</sup>**

| Questions                                                                                                                                                                                                                                                                                                                                                                 | Response required to be eligible for BOOST Trial |
|---------------------------------------------------------------------------------------------------------------------------------------------------------------------------------------------------------------------------------------------------------------------------------------------------------------------------------------------------------------------------|--------------------------------------------------|
| 1. In the past 6 WEEKS, have you had back pain <b>and/or</b> pain or other symptoms such as tingling, numbness or heaviness that travelled from your back into your buttocks or legs?<br>[Note: If the answer to this question is no, then the participant will not complete the remaining questions].                                                                    | Yes                                              |
| 1. Does standing make the pain or symptoms in your buttocks or legs worse?<br>2. Does walking make the pain or symptoms in your buttocks or legs worse?<br>3. Does sitting down make the pain or symptoms in your buttocks or legs better?<br>4. Does bending forward (for example to push a shopping trolley) make the pain or symptoms in your buttocks or legs better? | Yes to at least one of these questions           |

**Table 3: Data collection and outcomes for the BOOST Trial**

| Method                              | Domains measured           | Measure                                                                                                                                                                                                                                                                                                                                                                                                                                                                                                                                                                                                                                                                                                                                                                      | Time points                                     |
|-------------------------------------|----------------------------|------------------------------------------------------------------------------------------------------------------------------------------------------------------------------------------------------------------------------------------------------------------------------------------------------------------------------------------------------------------------------------------------------------------------------------------------------------------------------------------------------------------------------------------------------------------------------------------------------------------------------------------------------------------------------------------------------------------------------------------------------------------------------|-------------------------------------------------|
| Participant completed questionnaire | Demographic information    | Age and sex<br>Current alcohol and smoking behaviour <sup>24</sup><br>Ethnicity<br>Relationship status<br>Postcode<br>Type of housing<br>Current occupation<br>Education<br>Unpaid/paid carer [Question: Do you have an unpaid carer? (Someone who is not paid to care for you and without whose support you cannot cope. This could be a partner, family member or friend) Yes/No. Paid carer question is the same format.]<br>Household income                                                                                                                                                                                                                                                                                                                             | 0 months                                        |
|                                     | Back pain and leg symptoms | <b>Oswestry Disability Index (V2.1a)<sup>25</sup> – Primary Outcome</b><br>Troublesomeness of back and leg problems <sup>26</sup><br>Perceived ability to self-manage their condition [Question: We would like you to think about how you are managing your symptoms and your ability to walk and be mobile. How well do you feel that you are managing your back and leg problems TODAY? (Visual Analogue Scale (VAS) 0=Not managing at all; 10=Managing extremely well)]                                                                                                                                                                                                                                                                                                   | 0,6,12 months                                   |
|                                     | Quality of life            | EQ-5D-5L <sup>27</sup>                                                                                                                                                                                                                                                                                                                                                                                                                                                                                                                                                                                                                                                                                                                                                       | 0,6,12 months                                   |
|                                     | Other pain                 | Nordic pain questionnaire <sup>18 19</sup>                                                                                                                                                                                                                                                                                                                                                                                                                                                                                                                                                                                                                                                                                                                                   | 0 months                                        |
|                                     | Comorbidity                | Self-report of current health conditions                                                                                                                                                                                                                                                                                                                                                                                                                                                                                                                                                                                                                                                                                                                                     | 0 months                                        |
|                                     | Frailty                    | Tilburg Frailty Index <sup>28</sup>                                                                                                                                                                                                                                                                                                                                                                                                                                                                                                                                                                                                                                                                                                                                          | 0,6,12 months                                   |
|                                     | Physical activity          | 2 items from Rapid Assessment Disuse Index <sup>29</sup> [1. Time spent moving around on your feet; 2. Time spent sitting]                                                                                                                                                                                                                                                                                                                                                                                                                                                                                                                                                                                                                                                   | 0,6,12 months                                   |
|                                     | Mobility                   | Change in mobility in the last year [Question: Compared to one year ago, how would you rate your walking in general? Much better now than one year ago; Somewhat better than one year ago; About the same; Somewhat worse than one year ago; Much worse now than one year ago]<br>Self-rated walking speed <sup>20</sup><br>Use of walking aids inside and outside [Question: Do you use a walking aid (e.g. walking stick, walker) to walk around outside/inside? Yes; no; sometimes]<br>Change in mobility in the last 6 months [Question: Compared to 6 months ago, how would you rate your walking in general? Much better now than 6 months ago; Somewhat better than 6 months ago; About the same; Somewhat worse than 6 months ago; Much worse now than 6 months ago] | 0 months<br><br><br><br><br><br><br>6,12 months |



|                                   |                            |                                                                                                                                                                                                                                                                                                                                                                                                                                                                                                                                                                                                                                                                                                                         |                                              |
|-----------------------------------|----------------------------|-------------------------------------------------------------------------------------------------------------------------------------------------------------------------------------------------------------------------------------------------------------------------------------------------------------------------------------------------------------------------------------------------------------------------------------------------------------------------------------------------------------------------------------------------------------------------------------------------------------------------------------------------------------------------------------------------------------------------|----------------------------------------------|
|                                   | Balance and falls          | Prevention of Falls Network Europe (ProFANE) self-report of falls and fall related injuries <sup>30</sup>                                                                                                                                                                                                                                                                                                                                                                                                                                                                                                                                                                                                               | 0,6,12 months                                |
|                                   | Self-efficacy              | Single item from the Modified Gait Self-Efficacy Scale (10-item) <sup>31</sup> [Question: How much confidence do you have that you would be able to safely walk a long distance such as 1/2 mile? (VAS 0=no confidence; 10=complete confidence)]<br>Exercise self-efficacy scale (short version) <sup>22</sup><br>Self-efficacy recovery and maintenance related to performing home exercises <sup>32 33</sup>                                                                                                                                                                                                                                                                                                          | 0,6,12 months<br><br>0 months<br>6,12 months |
|                                   | Exercise adherence         | Intention to carry out home exercises <sup>34</sup> [Question: As part of the BOOST Trial, the physiotherapist will ask you to exercise at home at least twice a week for up to 20 minutes. How much do you agree with this statement? I intend to do these exercises at least twice a week for up to 20 minutes. Strongly Disagree; Disagree; Somewhat disagree; Neither agree nor disagree; Somewhat agree; Agree; Strongly agree]<br>Self-report of adherence to home exercise programme [Question: In the past 6 months, on average, how many times per week have you managed to do your exercises for at least 20 minutes? Never; 1 day per week; 2 days per week; 3-4 days per week; 5-6 days per week; Everyday] | 0 months<br><br>6,12 months                  |
|                                   | Habit (automaticity)       | Index of habit (short version) <sup>35</sup>                                                                                                                                                                                                                                                                                                                                                                                                                                                                                                                                                                                                                                                                            | 6,12 months                                  |
|                                   | Fear avoidance             | Fear avoidance beliefs questionnaire <sup>36</sup>                                                                                                                                                                                                                                                                                                                                                                                                                                                                                                                                                                                                                                                                      | 0,6,12 months                                |
|                                   | Beliefs about ageing       | Attitude to ageing questionnaire – physical changes subscale <sup>23</sup>                                                                                                                                                                                                                                                                                                                                                                                                                                                                                                                                                                                                                                              | 0 months                                     |
|                                   | Global rating of change    | Change in back and leg problems <sup>37</sup>                                                                                                                                                                                                                                                                                                                                                                                                                                                                                                                                                                                                                                                                           | 6,12 months                                  |
|                                   | Satisfaction               | Satisfaction with the exercises, changes in back & leg problems, increases in physical activity [All questions follow this format: How satisfied are you with the exercises that you were given to help with your back and leg problems? (VAS 0-4; 0=very dissatisfied; 4=very satisfied)]                                                                                                                                                                                                                                                                                                                                                                                                                              | 6,12 months                                  |
| Clinical interview and assessment | Height                     | Measured using a stadiometer                                                                                                                                                                                                                                                                                                                                                                                                                                                                                                                                                                                                                                                                                            | 0 months                                     |
|                                   | Weight                     | Measured using digital scales                                                                                                                                                                                                                                                                                                                                                                                                                                                                                                                                                                                                                                                                                           | 0 months                                     |
|                                   | Spinal parameters          | Sagittal alignment of the spine measured using C7 to wall measure <sup>38 39</sup>                                                                                                                                                                                                                                                                                                                                                                                                                                                                                                                                                                                                                                      | 0,6,12 months                                |
|                                   | Frailty                    | Hand Grip Strength <sup>40</sup> measured using a Jamar Plus+ dynamometer                                                                                                                                                                                                                                                                                                                                                                                                                                                                                                                                                                                                                                               | 0,6,12 months                                |
|                                   | Mobility                   | 6 minute walk test <sup>41</sup>                                                                                                                                                                                                                                                                                                                                                                                                                                                                                                                                                                                                                                                                                        | 0,6,12 months                                |
|                                   | Mobility/balance           | Short Physical Performance Battery <sup>42</sup>                                                                                                                                                                                                                                                                                                                                                                                                                                                                                                                                                                                                                                                                        | 0,6,12 months                                |
|                                   | Back pain and leg symptoms | STarT Back Screening Questionnaire <sup>21</sup><br>Swiss Spinal Stenosis Scale (Symptom subscale) <sup>43 44</sup>                                                                                                                                                                                                                                                                                                                                                                                                                                                                                                                                                                                                     | 0 months<br>0,6,12 months                    |
|                                   | Medication use             | Self-report of medication use                                                                                                                                                                                                                                                                                                                                                                                                                                                                                                                                                                                                                                                                                           | 0,6,12 months                                |
|                                   | Health resource use        | Client Service Receipt Inventory <sup>45</sup>                                                                                                                                                                                                                                                                                                                                                                                                                                                                                                                                                                                                                                                                          | 6,12 months                                  |
| Imaging                           | Spinal parameters          | MRI Scan - use existing scan taken in the last 12 months or referred for scan after randomisation                                                                                                                                                                                                                                                                                                                                                                                                                                                                                                                                                                                                                       | Variable                                     |



1  
2  
3  
4  
5  
6  
7  
8  
9  
10  
11  
12  
13  
14  
15  
16  
17  
18  
19  
20  
21  
22  
23  
24  
25  
26  
27  
28  
29  
30  
31  
32  
33  
34  
35  
36  
37  
38  
39  
40  
41  
42  
43  
44  
45  
46  
47  
48  
49  
50  
51  
52  
53  
54  
55  
56  
57  
58  
59  
60

**Table 4: Imaging parameters**

| <b>Sequ</b> | <b>FOV</b> | <b>Slice</b> | <b>Gap</b> | <b>TR</b> | <b>TE</b> | <b>ETL</b> | <b>Phase</b> | <b>Freq</b> | <b>Nex</b> |
|-------------|------------|--------------|------------|-----------|-----------|------------|--------------|-------------|------------|
| T2 sag      | 370        | 13/4         | 1          | 4061      | 102       | 23         | 320          | 512         | 3          |
| T1 Sag      | 370        | 13/4         | 1          | 446       | 11        | 23         | 224          | 416         | 3          |
| T2 axial    | 200        | 30/4         | 1          | 4955      | 111       | 25         | 224          | 320         | 3          |

For peer review only

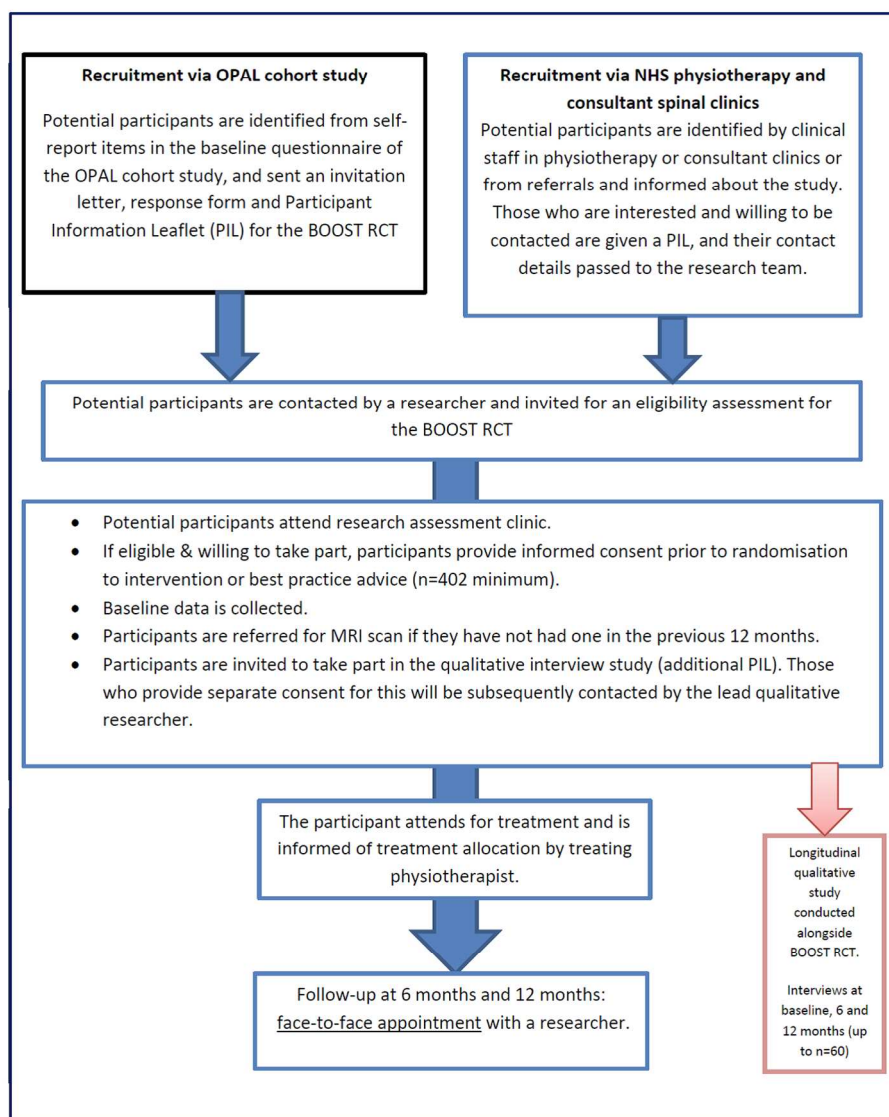

Figure 1: Study flow chart

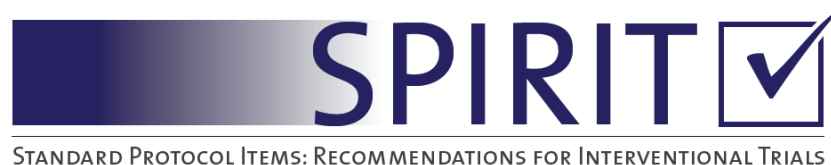

SPIRIT 2013 Checklist: Recommended items to address in a clinical trial protocol and related documents\*

| Section/item                      | Item No | Description                                                                                                                                                                                                                                                                              | Addressed on page number |
|-----------------------------------|---------|------------------------------------------------------------------------------------------------------------------------------------------------------------------------------------------------------------------------------------------------------------------------------------------|--------------------------|
| <b>Administrative information</b> |         |                                                                                                                                                                                                                                                                                          |                          |
| Title                             | 1       | Descriptive title identifying the study design, population, interventions, and, if applicable, trial acronym                                                                                                                                                                             | 1                        |
| Trial registration                | 2a      | Trial identifier and registry name. If not yet registered, name of intended registry                                                                                                                                                                                                     | 3                        |
|                                   | 2b      | All items from the World Health Organization Trial Registration Data Set                                                                                                                                                                                                                 | See ISRCTN website       |
| Protocol version                  | 3       | Date and version identifier                                                                                                                                                                                                                                                              | N/A                      |
| Funding                           | 4       | Sources and types of financial, material, and other support                                                                                                                                                                                                                              | 19                       |
| Roles and responsibilities        | 5a      | Names, affiliations, and roles of protocol contributors                                                                                                                                                                                                                                  | 1 and 19                 |
|                                   | 5b      | Name and contact information for the trial sponsor                                                                                                                                                                                                                                       | 19                       |
|                                   | 5c      | Role of study sponsor and funders, if any, in study design; collection, management, analysis, and interpretation of data; writing of the report; and the decision to submit the report for publication, including whether they will have ultimate authority over any of these activities | 19                       |
|                                   | 5d      | Composition, roles, and responsibilities of the coordinating centre, steering committee, endpoint adjudication committee, data management team, and other individuals or groups overseeing the trial, if applicable (see Item 21a for data monitoring committee)                         | 18-19                    |

1 **Introduction**

2

3 Background and 6a Description of research question and justification for undertaking the trial, including summary of relevant 4  
 4 rationale studies (published and unpublished) examining benefits and harms for each intervention  
 5

6 6b Explanation for choice of comparators 4-5  
 7

8 Objectives 7 Specific objectives or hypotheses 4  
 9

10 Trial design 8 Description of trial design including type of trial (eg, parallel group, crossover, factorial, single group),  
 11 allocation ratio, and framework (eg, superiority, equivalence, noninferiority, exploratory) 5  
 12  
 13

14 **Methods: Participants, interventions, and outcomes**

15

16 Study setting 9 Description of study settings (eg, community clinic, academic hospital) and list of countries where data will 5  
 17 be collected. Reference to where list of study sites can be obtained  
 18

19 Eligibility criteria 10 Inclusion and exclusion criteria for participants. If applicable, eligibility criteria for study centres and 5  
 20 individuals who will perform the interventions (eg, surgeons, psychotherapists)  
 21

22 Interventions 11a Interventions for each group with sufficient detail to allow replication, including how and when they will be 12-13  
 23 administered A separate paper  
 24 describing the  
 25 intervention in  
 26 detail will be  
 27 published  
 28

29 11b Criteria for discontinuing or modifying allocated interventions for a given trial participant (eg, drug dose 12-13  
 30 change in response to harms, participant request, or improving/worsening disease)  
 31

32 11c Strategies to improve adherence to intervention protocols, and any procedures for monitoring adherence 12-14  
 33 (eg, drug tablet return, laboratory tests)  
 34

35 11d Relevant concomitant care and interventions that are permitted or prohibited during the trial 13  
 36  
 37  
 38  
 39  
 40  
 41  
 42

|    |                      |    |                                                                                                                                                                                                                                                                                                                                                                                |                          |
|----|----------------------|----|--------------------------------------------------------------------------------------------------------------------------------------------------------------------------------------------------------------------------------------------------------------------------------------------------------------------------------------------------------------------------------|--------------------------|
| 1  | Outcomes             | 12 | Primary, secondary, and other outcomes, including the specific measurement variable (eg, systolic blood pressure), analysis metric (eg, change from baseline, final value, time to event), method of aggregation (eg, median, proportion), and time point for each outcome. Explanation of the clinical relevance of chosen efficacy and harm outcomes is strongly recommended | 7-11<br>Table 3, Table 4 |
| 2  |                      |    |                                                                                                                                                                                                                                                                                                                                                                                |                          |
| 3  |                      |    |                                                                                                                                                                                                                                                                                                                                                                                |                          |
| 4  |                      |    |                                                                                                                                                                                                                                                                                                                                                                                |                          |
| 5  |                      |    |                                                                                                                                                                                                                                                                                                                                                                                |                          |
| 6  | Participant timeline | 13 | Time schedule of enrolment, interventions (including any run-ins and washouts), assessments, and visits for participants. A schematic diagram is highly recommended (see Figure)                                                                                                                                                                                               | Figure 1                 |
| 7  |                      |    |                                                                                                                                                                                                                                                                                                                                                                                |                          |
| 8  |                      |    |                                                                                                                                                                                                                                                                                                                                                                                |                          |
| 9  | Sample size          | 14 | Estimated number of participants needed to achieve study objectives and how it was determined, including clinical and statistical assumptions supporting any sample size calculations                                                                                                                                                                                          | 14-15                    |
| 10 |                      |    |                                                                                                                                                                                                                                                                                                                                                                                |                          |
| 11 |                      |    |                                                                                                                                                                                                                                                                                                                                                                                |                          |
| 12 |                      |    |                                                                                                                                                                                                                                                                                                                                                                                |                          |
| 13 | Recruitment          | 15 | Strategies for achieving adequate participant enrolment to reach target sample size                                                                                                                                                                                                                                                                                            | 6                        |
| 14 |                      |    |                                                                                                                                                                                                                                                                                                                                                                                |                          |

### Methods: Assignment of interventions (for controlled trials)

#### Allocation:

|    |                                  |     |                                                                                                                                                                                                                                                                                                                                                          |   |
|----|----------------------------------|-----|----------------------------------------------------------------------------------------------------------------------------------------------------------------------------------------------------------------------------------------------------------------------------------------------------------------------------------------------------------|---|
| 19 | Sequence generation              | 16a | Method of generating the allocation sequence (eg, computer-generated random numbers), and list of any factors for stratification. To reduce predictability of a random sequence, details of any planned restriction (eg, blocking) should be provided in a separate document that is unavailable to those who enrol participants or assign interventions | 9 |
| 20 |                                  |     |                                                                                                                                                                                                                                                                                                                                                          |   |
| 21 |                                  |     |                                                                                                                                                                                                                                                                                                                                                          |   |
| 22 |                                  |     |                                                                                                                                                                                                                                                                                                                                                          |   |
| 23 |                                  |     |                                                                                                                                                                                                                                                                                                                                                          |   |
| 24 |                                  |     |                                                                                                                                                                                                                                                                                                                                                          |   |
| 25 | Allocation concealment mechanism | 16b | Mechanism of implementing the allocation sequence (eg, central telephone; sequentially numbered, opaque, sealed envelopes), describing any steps to conceal the sequence until interventions are assigned                                                                                                                                                | 9 |
| 26 |                                  |     |                                                                                                                                                                                                                                                                                                                                                          |   |
| 27 |                                  |     |                                                                                                                                                                                                                                                                                                                                                          |   |
| 28 |                                  |     |                                                                                                                                                                                                                                                                                                                                                          |   |
| 29 | Implementation                   | 16c | Who will generate the allocation sequence, who will enrol participants, and who will assign participants to interventions                                                                                                                                                                                                                                | 9 |
| 30 |                                  |     |                                                                                                                                                                                                                                                                                                                                                          |   |
| 31 |                                  |     |                                                                                                                                                                                                                                                                                                                                                          |   |
| 32 |                                  |     |                                                                                                                                                                                                                                                                                                                                                          |   |
| 33 | Blinding (masking)               | 17a | Who will be blinded after assignment to interventions (eg, trial participants, care providers, outcome assessors, data analysts), and how                                                                                                                                                                                                                | 9 |
| 34 |                                  |     |                                                                                                                                                                                                                                                                                                                                                          |   |
| 35 |                                  |     |                                                                                                                                                                                                                                                                                                                                                          |   |
| 36 |                                  | 17b | If blinded, circumstances under which unblinding is permissible, and procedure for revealing a participant's allocated intervention during the trial                                                                                                                                                                                                     | 9 |
| 37 |                                  |     |                                                                                                                                                                                                                                                                                                                                                          |   |
| 38 |                                  |     |                                                                                                                                                                                                                                                                                                                                                          |   |
| 39 |                                  |     |                                                                                                                                                                                                                                                                                                                                                          |   |
| 40 |                                  |     |                                                                                                                                                                                                                                                                                                                                                          |   |
| 41 |                                  |     |                                                                                                                                                                                                                                                                                                                                                          |   |
| 42 |                                  |     |                                                                                                                                                                                                                                                                                                                                                          |   |

1  
2  
3 **Methods: Data collection, management, and analysis**  
4

|                               |     |                                                                                                               |                  |
|-------------------------------|-----|---------------------------------------------------------------------------------------------------------------|------------------|
| 5 Data collection             | 18a | Plans for assessment and collection of outcome, baseline, and other trial data, including any related         | 7-11             |
| 6 methods                     |     | processes to promote data quality (eg, duplicate measurements, training of assessors) and a description of    | Table 3, Table 4 |
| 7                             |     | study instruments (eg, questionnaires, laboratory tests) along with their reliability and validity, if known. |                  |
| 8                             |     | Reference to where data collection forms can be found, if not in the protocol                                 |                  |
| 9                             |     |                                                                                                               |                  |
| 10                            |     |                                                                                                               |                  |
| 11                            | 18b | Plans to promote participant retention and complete follow-up, including list of any outcome data to be       | 11-12            |
| 12                            |     | collected for participants who discontinue or deviate from intervention protocols                             |                  |
| 13                            |     |                                                                                                               |                  |
| 14 Data management            | 19  | Plans for data entry, coding, security, and storage, including any related processes to promote data quality  | 18               |
| 15                            |     | (eg, double data entry; range checks for data values). Reference to where details of data management          |                  |
| 16                            |     | procedures can be found, if not in the protocol                                                               |                  |
| 17                            |     |                                                                                                               |                  |
| 18                            |     |                                                                                                               |                  |
| 19 Statistical methods        | 20a | Statistical methods for analysing primary and secondary outcomes. Reference to where other details of the     | 15-17            |
| 20                            |     | statistical analysis plan can be found, if not in the protocol                                                |                  |
| 21                            |     |                                                                                                               |                  |
| 22                            | 20b | Methods for any additional analyses (eg, subgroup and adjusted analyses)                                      | 15-17            |
| 23                            |     |                                                                                                               |                  |
| 24                            | 20c | Definition of analysis population relating to protocol non-adherence (eg, as randomised analysis), and any    | 15-17            |
| 25                            |     | statistical methods to handle missing data (eg, multiple imputation)                                          |                  |
| 26                            |     |                                                                                                               |                  |
| 27                            |     |                                                                                                               |                  |
| 28 <b>Methods: Monitoring</b> |     |                                                                                                               |                  |
| 29                            |     |                                                                                                               |                  |
| 30 Data monitoring            | 21a | Composition of data monitoring committee (DMC); summary of its role and reporting structure; statement of     | 18-19            |
| 31                            |     | whether it is independent from the sponsor and competing interests; and reference to where further details    |                  |
| 32                            |     | about its charter can be found, if not in the protocol. Alternatively, an explanation of why a DMC is not     |                  |
| 33                            |     | needed                                                                                                        |                  |
| 34                            |     |                                                                                                               |                  |
| 35                            |     |                                                                                                               |                  |
| 36                            | 21b | Description of any interim analyses and stopping guidelines, including who will have access to these interim  | 18-19            |
| 37                            |     | results and make the final decision to terminate the trial                                                    |                  |
| 38                            |     |                                                                                                               |                  |
| 39 Harms                      | 22  | Plans for collecting, assessing, reporting, and managing solicited and spontaneously reported adverse         | 12               |
| 40                            |     | events and other unintended effects of trial interventions or trial conduct                                   |                  |
| 41                            |     |                                                                                                               |                  |
| 42                            |     |                                                                                                               |                  |

|    |                                 |     |                                                                                                                                                                                                                                                                                     |               |
|----|---------------------------------|-----|-------------------------------------------------------------------------------------------------------------------------------------------------------------------------------------------------------------------------------------------------------------------------------------|---------------|
| 1  | Auditing                        | 23  | Frequency and procedures for auditing trial conduct, if any, and whether the process will be independent from investigators and the sponsor                                                                                                                                         | 12- 13, 18-19 |
| 2  |                                 |     |                                                                                                                                                                                                                                                                                     |               |
| 3  |                                 |     |                                                                                                                                                                                                                                                                                     |               |
| 4  | <b>Ethics and dissemination</b> |     |                                                                                                                                                                                                                                                                                     |               |
| 5  |                                 |     |                                                                                                                                                                                                                                                                                     |               |
| 6  | Research ethics approval        | 24  | Plans for seeking research ethics committee/institutional review board (REC/IRB) approval                                                                                                                                                                                           | 18            |
| 7  |                                 |     |                                                                                                                                                                                                                                                                                     |               |
| 8  |                                 |     |                                                                                                                                                                                                                                                                                     |               |
| 9  | Protocol amendments             | 25  | Plans for communicating important protocol modifications (eg, changes to eligibility criteria, outcomes, analyses) to relevant parties (eg, investigators, REC/IRBs, trial participants, trial registries, journals, regulators)                                                    | 18            |
| 10 |                                 |     |                                                                                                                                                                                                                                                                                     |               |
| 11 |                                 |     |                                                                                                                                                                                                                                                                                     |               |
| 12 |                                 |     |                                                                                                                                                                                                                                                                                     |               |
| 13 |                                 |     |                                                                                                                                                                                                                                                                                     |               |
| 14 | Consent or assent               | 26a | Who will obtain informed consent or assent from potential trial participants or authorised surrogates, and how (see Item 32)                                                                                                                                                        | 7, 17         |
| 15 |                                 |     |                                                                                                                                                                                                                                                                                     |               |
| 16 |                                 |     |                                                                                                                                                                                                                                                                                     |               |
| 17 |                                 | 26b | Additional consent provisions for collection and use of participant data and biological specimens in ancillary studies, if applicable                                                                                                                                               | N/A           |
| 18 |                                 |     |                                                                                                                                                                                                                                                                                     |               |
| 19 |                                 |     |                                                                                                                                                                                                                                                                                     |               |
| 20 | Confidentiality                 | 27  | How personal information about potential and enrolled participants will be collected, shared, and maintained in order to protect confidentiality before, during, and after the trial                                                                                                | 18            |
| 21 |                                 |     |                                                                                                                                                                                                                                                                                     |               |
| 22 |                                 |     |                                                                                                                                                                                                                                                                                     |               |
| 23 | Declaration of interests        | 28  | Financial and other competing interests for principal investigators for the overall trial and each study site                                                                                                                                                                       | 19            |
| 24 |                                 |     |                                                                                                                                                                                                                                                                                     |               |
| 25 |                                 |     |                                                                                                                                                                                                                                                                                     |               |
| 26 |                                 |     |                                                                                                                                                                                                                                                                                     |               |
| 27 | Access to data                  | 29  | Statement of who will have access to the final trial dataset, and disclosure of contractual agreements that limit such access for investigators                                                                                                                                     | 20            |
| 28 |                                 |     |                                                                                                                                                                                                                                                                                     |               |
| 29 |                                 |     |                                                                                                                                                                                                                                                                                     |               |
| 30 | Ancillary and post-trial care   | 30  | Provisions, if any, for ancillary and post-trial care, and for compensation to those who suffer harm from trial participation                                                                                                                                                       | N/A           |
| 31 |                                 |     |                                                                                                                                                                                                                                                                                     |               |
| 32 |                                 |     |                                                                                                                                                                                                                                                                                     |               |
| 33 | Dissemination policy            | 31a | Plans for investigators and sponsor to communicate trial results to participants, healthcare professionals, the public, and other relevant groups (eg, via publication, reporting in results databases, or other data sharing arrangements), including any publication restrictions | 18            |
| 34 |                                 |     |                                                                                                                                                                                                                                                                                     |               |
| 35 |                                 |     |                                                                                                                                                                                                                                                                                     |               |
| 36 |                                 |     |                                                                                                                                                                                                                                                                                     |               |
| 37 |                                 |     |                                                                                                                                                                                                                                                                                     |               |
| 38 |                                 | 31b | Authorship eligibility guidelines and any intended use of professional writers                                                                                                                                                                                                      | N/A           |
| 39 |                                 |     |                                                                                                                                                                                                                                                                                     |               |
| 40 |                                 | 31c | Plans, if any, for granting public access to the full protocol, participant-level dataset, and statistical code                                                                                                                                                                     | 20            |
| 41 |                                 |     |                                                                                                                                                                                                                                                                                     |               |
| 42 |                                 |     |                                                                                                                                                                                                                                                                                     |               |

**Appendices**

|                            |    |                                                                                                                                                                                                |                     |
|----------------------------|----|------------------------------------------------------------------------------------------------------------------------------------------------------------------------------------------------|---------------------|
| Informed consent materials | 32 | Model consent form and other related documentation given to participants and authorised surrogates                                                                                             | Approved by the REC |
| Biological specimens       | 33 | Plans for collection, laboratory evaluation, and storage of biological specimens for genetic or molecular analysis in the current trial and for future use in ancillary studies, if applicable | N/A                 |

\*It is strongly recommended that this checklist be read in conjunction with the SPIRIT 2013 Explanation & Elaboration for important clarification on the items. Amendments to the protocol should be tracked and dated. The SPIRIT checklist is copyrighted by the SPIRIT Group under the Creative Commons "[Attribution-NonCommercial-NoDerivs 3.0 Unported](#)" license.



# BMJ Open

## Better Outcomes for Older people with Spinal Trouble [BOOST] Trial: A randomised controlled trial of a combined physical and psychological intervention for older adults with neurogenic claudication (protocol)

|                               |                                                                                                                                                                                                                                                                                                                                                                                                                                                                                                                                                                                                                                                                                                                                                                                                                                                                                                                                                                                                                                                                                                                                                                                                                                                                                                                                                                                                                                                                                                                                                                                                                                                                                                                                                                                                                                                                                                                                                                                                                                                                                                                                                                                                                                                                                                                                                                                                                              |
|-------------------------------|------------------------------------------------------------------------------------------------------------------------------------------------------------------------------------------------------------------------------------------------------------------------------------------------------------------------------------------------------------------------------------------------------------------------------------------------------------------------------------------------------------------------------------------------------------------------------------------------------------------------------------------------------------------------------------------------------------------------------------------------------------------------------------------------------------------------------------------------------------------------------------------------------------------------------------------------------------------------------------------------------------------------------------------------------------------------------------------------------------------------------------------------------------------------------------------------------------------------------------------------------------------------------------------------------------------------------------------------------------------------------------------------------------------------------------------------------------------------------------------------------------------------------------------------------------------------------------------------------------------------------------------------------------------------------------------------------------------------------------------------------------------------------------------------------------------------------------------------------------------------------------------------------------------------------------------------------------------------------------------------------------------------------------------------------------------------------------------------------------------------------------------------------------------------------------------------------------------------------------------------------------------------------------------------------------------------------------------------------------------------------------------------------------------------------|
| Journal:                      | <i>BMJ Open</i>                                                                                                                                                                                                                                                                                                                                                                                                                                                                                                                                                                                                                                                                                                                                                                                                                                                                                                                                                                                                                                                                                                                                                                                                                                                                                                                                                                                                                                                                                                                                                                                                                                                                                                                                                                                                                                                                                                                                                                                                                                                                                                                                                                                                                                                                                                                                                                                                              |
| Manuscript ID                 | bmjopen-2018-022205.R1                                                                                                                                                                                                                                                                                                                                                                                                                                                                                                                                                                                                                                                                                                                                                                                                                                                                                                                                                                                                                                                                                                                                                                                                                                                                                                                                                                                                                                                                                                                                                                                                                                                                                                                                                                                                                                                                                                                                                                                                                                                                                                                                                                                                                                                                                                                                                                                                       |
| Article Type:                 | Protocol                                                                                                                                                                                                                                                                                                                                                                                                                                                                                                                                                                                                                                                                                                                                                                                                                                                                                                                                                                                                                                                                                                                                                                                                                                                                                                                                                                                                                                                                                                                                                                                                                                                                                                                                                                                                                                                                                                                                                                                                                                                                                                                                                                                                                                                                                                                                                                                                                     |
| Date Submitted by the Author: | 11-Jul-2018                                                                                                                                                                                                                                                                                                                                                                                                                                                                                                                                                                                                                                                                                                                                                                                                                                                                                                                                                                                                                                                                                                                                                                                                                                                                                                                                                                                                                                                                                                                                                                                                                                                                                                                                                                                                                                                                                                                                                                                                                                                                                                                                                                                                                                                                                                                                                                                                                  |
| Complete List of Authors:     | <p>Williamson, Esther; University of Oxford Nuffield Department of Orthopaedics Rheumatology and Musculoskeletal Sciences, Centre for Rehabilitation Research</p> <p>Ward, Lesley; University of Oxford Nuffield Department of Orthopaedics Rheumatology and Musculoskeletal Sciences, Centre for Rehabilitation Research</p> <p>Vadher , Karan; University of Oxford, Centre for Statistics in Medicine</p> <p>Dutton, Susan; University of Oxford, Centre for Statistics in Medicine</p> <p>Parker, Ben; University of Warwick, Warwick Medical School</p> <p>Petrou, Stavros; University of Warwick, Warwick Medical School</p> <p>Hutchinson, Charles; University of Warwick, Warwick Medical School</p> <p>Gagen , Richard; University of Warwick, Warwick Medical School</p> <p>Arden, Nigel; University of Oxford Nuffield Department of Orthopaedics Rheumatology and Musculoskeletal Sciences</p> <p>Barker, Karen; Nuffield Orthopaedic Centre, Oxford University Hospitals NHS Trust,</p> <p>Boniface, Graham; University of Oxford Nuffield Department of Orthopaedics Rheumatology and Musculoskeletal Sciences, Centre for Rehabilitation Research</p> <p>Bruce, Julie; University of Warwick, Warwick Clinical Trials Unit</p> <p>Collins, Gary; University of Oxford, Centre for Statistics in Medicine</p> <p>fairbank, jeremy; University of Oxford Nuffield Department of Orthopaedics Rheumatology and Musculoskeletal Sciences</p> <p>Fitch , Judith ; Patient and Public Involvement Representative</p> <p>French, David; University of Manchester, School of Psychological Sciences</p> <p>Garrett, Angela; University of Oxford Nuffield Department of Orthopaedics Rheumatology and Musculoskeletal Sciences, Centre for Rehabilitation Research</p> <p>Ghandi, Varsha; University of Oxford Nuffield Department of Orthopaedics Rheumatology and Musculoskeletal Sciences, Centre for Rehabilitation Research</p> <p>Griffiths, Frances; University of Warwick, Warwick Medical School</p> <p>Hansen, Zara; University of Oxford Nuffield Department of Orthopaedics Rheumatology and Musculoskeletal Sciences, Centre for Rehabilitation Research</p> <p>Mallen, Christian; Keele University, Arthritis Research UK Primary Care Centre</p> <p>Morris , Alana ; University of Oxford Nuffield Department of Orthopaedics Rheumatology and Musculoskeletal Sciences, Centre for Rehabilitation</p> |

|                                      |                                                                                                                                                                       |
|--------------------------------------|-----------------------------------------------------------------------------------------------------------------------------------------------------------------------|
|                                      | Research<br>Lamb, Sarah; University of Oxford Nuffield Department of Orthopaedics<br>Rheumatology and Musculoskeletal Sciences, Centre for Rehabilitation<br>Research |
| <b>Primary Subject<br/>Heading</b> : | Rehabilitation medicine                                                                                                                                               |
| <b>Secondary Subject Heading</b> :   | Evidence based practice, Health economics, Health services research,<br>Qualitative research                                                                          |
| <b>Keywords</b> :                    | Neurogenic Claudication, Spinal Stenosis, Exercise, Cognitive Behavioural<br>Techniques, Physiotherapy, Randomised controlled trial                                   |
|                                      |                                                                                                                                                                       |

SCHOLARONE™  
Manuscripts

1  
2  
3  
4  
5 **Better Outcomes for Older people with Spinal Trouble [BOOST] Trial:**  
6 **A randomised controlled trial of a combined physical and**  
7 **psychological intervention for older adults with neurogenic**  
8 **claudication (protocol)**  
9  
10

11  
12 **Authors:**  
13

14 Esther Williamson<sup>1</sup>, Lesley Ward<sup>1</sup>, Karan Vadher<sup>2</sup>, Susan J Dutton<sup>2</sup>, Ben Parker<sup>3</sup>, Stavros Petrou<sup>3</sup>,  
15 Charles Hutchinson<sup>3</sup>, Richard Gagen<sup>3</sup>, Nigel Arden<sup>1</sup>, Karen Barker<sup>4</sup>, Graham Boniface<sup>1</sup>, Julie Bruce<sup>3</sup>,  
16 Gary Collins<sup>2</sup>, Jeremy Fairbank<sup>1</sup>, Judith Fitch<sup>5</sup>, David P French<sup>6</sup>, Angela Garrett<sup>1</sup>, Varsha Ghandi<sup>1</sup>,  
17 Frances Griffiths<sup>3</sup>, Zara Hansen<sup>1</sup>, Christian Mallen<sup>7</sup>, Alana Morris<sup>1</sup> and Sarah E Lamb<sup>1</sup>  
18  
19  
20  
21

22 <sup>1</sup>Nuffield Department of Rheumatology, Orthopaedics and Musculoskeletal Sciences, University of  
23 Oxford, UK  
24

25 <sup>2</sup> Oxford Clinical Trials Research Unit, Centre for Statistics in Medicine, Nuffield Department of  
26 Orthopaedics, Rheumatology and Musculoskeletal Sciences, University of Oxford, UK  
27

28 <sup>3</sup> Warwick Medical School, University of Warwick, UK  
29

30 <sup>4</sup> Oxford University Hospitals NHS Trust, Oxford, UK  
31

32 <sup>5</sup> Patient and Public Involvement Representative  
33

34 <sup>6</sup> Manchester Centre for Health Psychology, School of Health Sciences, University of Manchester, UK  
35

36 <sup>7</sup> Arthritis Research UK Primary Care Centre, Institute for Primary Care and Health Sciences, Keele  
37 University, Keele, UK  
38  
39

40 **Correspondence to:** Dr Esther Williamson, Centre for Rehabilitation Research, Nuffield Department  
41 of Orthopaedics, Rheumatology and Musculoskeletal Sciences, University of Oxford, Botnar Research  
42 Building, Windmill Road, Oxford, OX3 7LD, UK. Tel: +44 1865 223120; Email:  
43 [esther.williamson@ndorms.ox.ac.uk](mailto:esther.williamson@ndorms.ox.ac.uk)  
44  
45  
46  
47  
48  
49  
50  
51  
52  
53  
54  
55  
56  
57  
58  
59  
60

## Strengths and limitations

- The strengths of the trial are that it has a pre-specified sample size estimate, a primary outcome that is highly applicable to neurogenic claudication as it includes standing and walking, is multi-centred, and includes health economic and qualitative evaluations. In addition to self-reported measures, the study includes objective physical capacity measures.
- The trial has been informed by structured patient and public involvement.
- The intervention is individually tailored and utilises group supervision to maximise the potential for cost-effectiveness.
- Due to the nature of the intervention, participants cannot be blinded to treatment allocation.

## Abstract:

Introduction: Neurogenic claudication due to spinal stenosis is common in older adults. The effectiveness of conservative interventions is not known. The study aim is to estimate the clinical and cost-effectiveness of a physiotherapist delivered, combined physical and psychological intervention.

Methods and analysis: This is a pragmatic, multi-centred, randomised controlled trial. Participants are randomised to a combined physical and psychological intervention (BOOST programme) or best practice advice (control). Community-dwelling adults, 65 years and over, with neurogenic claudication are identified from community and secondary care services. Recruitment is supplemented using a primary care based cohort. Participants are registered prospectively and randomised in a 2:1 ratio (intervention:control) using a web-based service to ensure allocation concealment. The target sample size is a minimum of 402.

The BOOST programme consists of an individual assessment and twelve 90 minute classes, including education and discussion underpinned by cognitive behavioural techniques, exercises and walking circuit. During and after the classes, participants undertake home exercises and there are 2 support telephone calls to promote adherence with the exercises. Best practice advice is delivered in 1-3 individual sessions with a physiotherapist.

The primary outcome is the Oswestry Disability Index at 12 months. Secondary outcomes include the 6 minute walk test, Short Performance Physical Battery, Fear Avoidance Beliefs Questionnaire and Gait Self-efficacy Scale. Outcomes are measured at 6 and 12 months by researchers who are masked to treatment allocation. The primary statistical analysis will be by 'intention to treat'. There is a parallel health economic evaluation and qualitative study.

Ethics and dissemination: Ethical approval was given on the 03 March 2016 (National Research Ethics Committee number: 16/LO/0349). This protocol adheres to the SPIRIT Checklist. Results will be reported at conferences and in peer-reviewed publications using the CONSORT guidelines. A plain English summary will be published on the BOOST website.

Trial registration: ISRCTN12698674

Keywords: Neurogenic claudication, spinal stenosis, exercise, randomised controlled trial

## Introduction

Neurogenic claudication (NC) is a condition that frequently affects older adults<sup>1</sup>. The burden of symptoms is substantial. NC presents as pain, discomfort or other symptoms radiating from the spine into the buttocks and legs, which is provoked by walking or prolonged standing and relieved by sitting or lumbar flexion<sup>2</sup>. Other signs and symptoms include weakness, altered sensation, fatigue and gait changes<sup>2</sup>. Pain in the lower back is usual but not a necessary diagnostic feature. The symptoms of NC are thought to arise from pressure on nerves and blood vessels in the spinal canal caused by degenerative changes narrowing the volume of the spinal canal. Narrowing may or may not be evident on radiological imaging<sup>2,3</sup>. When narrowing is evident radiologically, the condition is termed Lumbar Spinal Stenosis (LSS). The relationship between imaging results and symptoms is inconsistent as not all people with radiological narrowing report symptoms of NC<sup>2,3</sup>.

Symptoms due to spinal stenosis are the most common reason for spinal surgery in people over 65 years of age<sup>4</sup>. However, the effectiveness of surgery is unclear, and it exposes older people to considerable risk of complications, including wound infection and cardiorespiratory problems<sup>4-6</sup>. Surgery is also expensive. Current clinical guidelines suggest that physiotherapy is an option for patients with symptoms arising from lumbar spinal stenosis before proceeding to surgery<sup>7</sup>. However, we do not know whether physiotherapy is effective, nor which physiotherapy techniques should be used<sup>8</sup>. A Cochrane systematic literature review reports that the current evidence for non-operative care for people with NC is very low to low quality<sup>9</sup>. All recent reviews agree that higher quality trials are needed<sup>9-13</sup>. Despite NC being a condition associated with older age, interventions tested to date have not targeted age-associated changes in the musculoskeletal system of participants (such as generalised sarcopenia and frailty) or the psychological impact of pain. In order to generate high quality evidence regarding non-surgical care for NC, our aim is to conduct a high quality, multi-centred, randomised controlled trial of a physiotherapist delivered combined physical and psychological intervention.

## Objectives

To estimate the clinical and cost-effectiveness of a physiotherapist delivered combined physical and psychological intervention for older adults with neurogenic claudication compared to best practice advice.

To explore whether indicators of frailty, behavioural factors and radiological (MRI) biomarkers can identify groups of participants who are more likely to respond positively to the intervention using pre-specified sub-group analyses.

To conduct a parallel, longitudinal qualitative study with a sample of trial participants to better understand participant experiences of living and ageing with NC, and to inform implementation if the intervention is successful.

## Methods/Design

### Overview

The study design is a multi-centred randomised controlled trial (RCT) with embedded qualitative study and economic evaluation (See Figure 1).

We are currently recruiting community-dwelling older adults with symptoms of neurogenic claudication. Recruitment opened on the 25<sup>th</sup> of July, 2016 and we anticipate recruitment to be completed around June 2018. Participants are identified from NHS Physiotherapy and Consultant Spinal Clinics in community and secondary care settings. In addition, participants are identified through a primary care based cohort study (The Oxford Pain, Activity and Lifestyle Survey [OPAL] cohort study). The OPAL Cohort Study is being conducted in the same localities as the trial.

The experimental intervention is a physiotherapist delivered combined physical and psychological programme. Participants attend an individual session, followed by 12 group sessions delivered over a 12-week period. During the individual session, participants undergo an assessment and are prescribed the exercises they will carry out during the group sessions tailored to their ability, symptom presentation and general health. The group sessions consists of: 1) education and group discussion based on cognitive behavioural (CB) techniques; 2) warm up and circuit exercises; and 3) a walking circuit. The education component focuses on pain management strategies, engagement with home exercises and increasing physical activity. The exercises target muscle strength, balance, and flexibility whilst the walking circuit aims to increase walking self-efficacy and mobility. The education component and supervised exercise is provided in groups of approximately 6 participants to maximise the potential for cost-effectiveness. There are two follow up phone calls on completion of the group sessions, to encourage adherence with the home exercise programme.

The comparator is advice given by a physiotherapist (best practice advice), ideally in one session, but up to two further review sessions are permissible. Advice includes self-management strategies, home exercises and encouragement to increase physical activity.

Participants are randomised in a 2:1 ratio (intervention:control) and followed up for 12 months (primary endpoint).

### Eligibility

Participants are included in the trial if they fulfil the eligibility criteria listed in Table 1. In the United Kingdom, the majority of adults are registered with a primary care practice. Due to the pragmatic nature of this trial, we include people with symptoms consistent with the clinical presentation of NC rather than a diagnosis of spinal stenosis based on evidence of narrowing of the spinal canal on an MRI scan. NC presents as a cluster of symptoms easily recognised using simple self-report questions identified in a recent systematic literature review<sup>3</sup> (Table 2). These questions have excellent sensitivity and specificity for identifying NC<sup>3</sup> and are used to screen for eligible participants.

The exclusion criteria are largely related to the participant being unable to participate in the intervention, for example, if they are unable to follow instructions or mobilise short distances without assistance. Participants are not excluded on the basis of any existing co-morbidities unless their General Practitioner (GP) feels inclusion in the study places them at risk.

## Approach

Potential participants are approached via two routes:

- 1) Physiotherapy and consultant spinal clinics in community and secondary care NHS settings

Potential participants are identified by clinical staff in physiotherapy and consultant spinal clinics or from referrals. Staff are asked to identify potentially eligible patients based on age ( $\geq 65$  years) and symptoms (back and/or leg symptoms) and to screen out those on surgical waiting lists if that information is available. Clinical staff approach potentially eligible patients attending clinics, provide information about the study and ask if they are interested in being contacted by the research team. Clinical staff may also contact new referrals by telephone to inform them about the study. Potential participants who are interested and willing to be contacted by the research team are provided with a Participant Information Leaflet (PIL), and their contact details are passed to the BOOST researcher for full eligibility screening.

- 2) The OPAL Cohort Study

The OPAL Cohort study is a population based cohort study. Participants are identified from a random sample of patients aged over 65 years registered with each participating primary care practice. The OPAL cohort study is currently ongoing at 34 primary care practices, and will be described elsewhere.

Embedded within the cohort study postal questionnaires are self-report questions to identify individuals with possible NC (Table 2). During the process of consent for the cohort study, OPAL participants are asked for additional consent for the University of Oxford to provide information and an invitation to clinical trials relevant to their clinical profile. OPAL participants who fulfil the initial criteria for the BOOST Trial (Table 1) are invited to take part in eligibility screening for the trial and provided with the BOOST PIL. OPAL participants who accept the invitation for screening are then contacted by telephone for initial screening.

## Eligibility screening

Potential participants identified via NHS spinal clinics or the OPAL cohort study are telephoned by the BOOST researcher (physiotherapists or research nurses) working at each site. During this telephone call, the researcher provides further information about the trial and completes initial eligibility checks. Eligible patients are invited to attend a research clinic appointment for a full assessment. If an individual requests to undertake the initial eligibility check in person then this is arranged.

The research clinic appointment includes assessment of symptoms to ensure they are consistent with NC (using the questions in Table 2), and screening for cauda equina syndrome or signs of serious pathology requiring immediate referral for investigations. Potential participants also undertake the Abbreviated Mental Test (AMT)<sup>14</sup> to screen for cognitive impairment, which would make it difficult for a person to participate in the intervention. The AMT contains 10 items to assess orientation, registration, recall and concentration. This test can be used by any clinician and only takes 3-4 minutes to administer<sup>15</sup>. A score of 6 or below (out of 10) suggests cognitive impairment requiring further assessment and patients are advised to consult their GP<sup>15-17</sup>. A mobility assessment



1  
2  
3 is undertaken if required to ensure the participant is able to mobilise independently at least 3  
4 metres unassisted (with or without a walking aid).  
5

### 6 **Informed consent**

7 On completion of the full eligibility assessment, eligible participants are asked to provide written  
8 informed consent prior to enrolling them into the trial. The consent is taken by a researcher who has  
9 completed training in the consent procedures for the BOOST Trial.  
10

### 11 **Baseline assessment**

12 After providing consent, the participant then completes a baseline questionnaire and undergoes a  
13 clinical assessment by the researcher. Data collection is described in Table 3. There are a number of  
14 variables only collected at baseline for the purposes of providing descriptive data on the sample.  
15 The participant is weighed using digital scales wearing light, indoor clothing with their shoes  
16 removed. Weight is recorded to the nearest 0.1 kg. Height is measured using a stadiometer  
17 positioned against a wall. The participant stands on the platform, shoes removed, as upright as  
18 possible, hands by their side. The head plate of the stadiometer is lowered until it gently rests on the  
19 top of the participant's head and the height is recorded in metres from the measuring rod, to the  
20 nearest 0.001m (1mm).  
21  
22

23  
24 The participant provides self-reported data including the demographic variables listed in Table 3, co-  
25 morbidities including other pain problems (measured using the Nordic pain questionnaire<sup>18 19</sup>) and  
26 their current mobility status. Measures of mobility status include use of walking aids inside and  
27 outside, and self-rated walking speed<sup>20</sup>. Change in mobility in the last year is measured using a 5  
28 point scale constructed for the trial.  
29  
30

31 The STarT Back Screening Questionnaire<sup>21</sup> is completed, allowing participants to be categorised  
32 according to their risk (low, medium or high) of developing persistent, disabling symptoms<sup>21</sup>. Self-  
33 reported psychological factors with a potential impact on outcome are also collected. These include  
34 their confidence to exercise (Exercise self-efficacy scale (short version)<sup>22</sup>) and their intention to carry  
35 out their home exercises using a question constructed for the trial (See Table 3). Participants'  
36 attitudes to the physical changes associated with ageing are measured using the Attitude to Ageing  
37 Questionnaire – physical changes subscale<sup>23</sup>.  
38  
39

40  
41 Variables collected at follow up are described in the section on outcome measures.  
42

### 43 **Imaging**

44 Alongside the RCT, there is an exploration of whether MRI scan parameters along with other  
45 baseline factors moderate response to physiotherapy treatment. Indirect visualisation by Magnetic  
46 Resonance Imaging (MRI) is the gold standard for diagnosing lumbar spinal stenosis when a patient  
47 presents with NC, and is always undertaken before surgery, but not necessarily before conservative  
48 treatment. Increasingly, GPs have open access to MRI imaging, and if MRI were predictive of  
49 response to conservative treatment this could aid GPs clinical decision making. Despite the expense,  
50 there is remarkably little evidence about whether MRI scans can guide treatment choice effectively.  
51 Research evidence indicates that the fit between symptoms and MRI changes is poor<sup>24 25</sup>. As MRI is  
52 currently the most common imaging investigation used, MRI data will be collected for all participants  
53 and we will systematically quantify the imaging characteristics. Pre-existing scans, taken in the 12  
54 months preceding randomisation, will be used where possible to reduce the need for scanning.  
55  
56  
57  
58  
59  
60

1  
2  
3 Participants will be referred for an MRI study of the lumbar spine if they have not had one in the 12  
4 months prior to randomisation. For these participants, the MRI scan will be taken after completion  
5 of other baseline data collection, and where possible before randomisation. Due to the nature of  
6 spinal stenosis we would not expect spinal parameters to change markedly over a year long period,  
7 hence, the rationale for including existing scans. Practically, it is not possible to collect all MRI data  
8 pre-baseline data collection as this may delay treatment and create unacceptable waiting times. For  
9 the sub-set of people who have MRI scans prior to randomisation we will undertake formal sub-  
10 group analysis. We will explore other aspects of the relationship between functional outcomes and  
11 scan characteristics in additional analyses (not to be reported alongside the main trial results).  
12  
13

14 Consent for referral for a new MRI or use of an existing scan is obtained at the time of consent for  
15 the trial. Existing scans are transferred to a central repository for analysis in DICOM (Digital Imaging  
16 and Communications in Medicine) format.  
17  
18

19 The MRI data collection follows the protocol typical of NHS imaging departments. This is very similar  
20 across departments and efforts have been made to standardise the protocol where significant  
21 differences were identified.  
22

23 We anticipate that a small number of participants will not have an MRI scan due to contraindications  
24 or by personal choice. Lack of an MRI scan does not exclude participants from the trial.  
25

#### 26 Imaging protocol

27  
28 The MRI scan is performed supine, with the knees supported in flexion by a small foam wedge,  
29 resulting in relaxation of the normal lumbar lordosis. Imaging is performed using a dedicated spine  
30 phased array coil.  
31

32  
33 T1 and T2 weighted sagittal imaging is followed by T2 weighted axial imaging of at least the lower  
34 three discs. The axial imaging is either taken as three separate blocks, each angulated and entered  
35 on the discs, or as a single block extending from L3 to S1.  
36

37 Imaging parameters should be near those described in Table 4. The BOOST Trial radiologist liaises  
38 with site to ensure data scans are suitable for data collection.  
39

40 MRI scans are assessed by a single observer blinded to treatment allocation. Measurement of bony  
41 canal and dural sac cross sectional area at each vertebral level allow assessment of central canal  
42 stenosis. The size of the lateral recess and neural exit foramen is measured and recorded  
43 quantitatively. The exact degree of narrowing to confirm stenosis is not well defined. In a review by  
44 Steurer et al<sup>26</sup>, a dural sac cross-sectional area of less than 100mm<sup>2</sup> was considered diagnostic of  
45 central canal stenosis. Similarly, lateral recess depth and foraminal diameter measurements of less  
46 than 3mm have been considered diagnostic of lateral recess and foramina stenosis respectively.  
47  
48

#### 49 Provision of MRI results to participants

50  
51 MRI scans requested for the purpose of the trial and not as part of a participant's clinical  
52 management are research investigations only. These are collected and assessed by the trial  
53 radiologist. If a serious spinal pathology is identified, the participant's GP and/or Spinal Consultant  
54 are immediately informed. If no serious pathology is identified then scan results will be made  
55  
56  
57  
58  
59

1  
2  
3 available to participants at the end of the study if requested. MRI reports will be sent to each  
4 participant's GP or spinal consultant so that scan results are explained to the participant  
5 appropriately.  
6

## 7 **Randomisation and masking**

8 Following baseline data collection, the researcher uses a web-based service to randomise the  
9 participants. During this process, the researcher is not informed of the treatment allocation. Instead,  
10 an automated email is sent directly to the physiotherapists who provide the interventions.  
11  
12

13 The web-based randomisation service is provided by the Oxford Clinical Trials Research Unit (OCTRU)  
14 consistent with UK Clinical Research Collaboration (UKCRC) approved standard operating  
15 procedures, ensuring prospective registration and allocation concealment. Randomisation is  
16 stratified by centre, age (65-74 years and 75 years+), and gender. Participants are randomised in a  
17 2:1 ratio (intervention:control) to ensure that there are enough participants to run a group  
18 intervention and minimise waiting times.  
19  
20

21 Physiotherapists delivering the interventions and participants cannot be masked to treatment  
22 allocation. All participants receive an initial one hour appointment. For those randomised to the  
23 BOOST programme, this is an assessment prior to attending the group sessions. For those  
24 randomised to the control arm, it is their initial physiotherapy session to deliver best practice advice.  
25 During this appointment, participants are informed of their treatment allocation by the  
26 physiotherapist. To ensure that researchers collecting follow up data remain masked to treatment  
27 allocation, physiotherapists and participants are asked not to share information about treatment  
28 allocation with researchers.  
29  
30

31 The trial statistician and the research staff undertaking quality assurance checks and the qualitative  
32 study are not blinded to treatment allocation. The remaining members of the trial management  
33 team, including all those who are involved in data management, are masked to treatment allocation.  
34  
35

## 36 **Outcome measures**

37 Follow up data is collected at 6 and 12 months after randomisation, at a clinic appointment. The  
38 outcomes are listed in Table 3.  
39  
40

### 41 *Primary outcome*

42 The primary outcome is low back pain disability measured using the Oswestry Disability Index (ODI  
43 v2.1a)<sup>27 28</sup> at 12 months after randomisation. The ODI is quite widely used as a measure for NC, and  
44 very widely used in the field of back pain. A comparison of the psychometric properties of four of  
45 the most promising self-report measures for NC demonstrated that the ODI had superior properties  
46 to other measures<sup>27</sup>. It is highly applicable to NC because it includes items on standing and walking.  
47 Scores range from 0-100, with higher scores indicating greater disability. Participants are asked to  
48 consider back and leg symptoms when responding including discomfort, heaviness, aching, tingling  
49 and numbness. Responses are not limited to the impact of back pain only.  
50  
51  
52

### 53 *Secondary outcomes*

54 A range of self-reported and physical measures are collected to evaluate the impact of the  
55 intervention on key treatment targets (symptoms of neurogenic claudication, mobility, physical  
56  
57  
58  
59  
60

activity, strength, balance, frailty and falls and cognitive and behavioural factors related to adherence with exercise and improving physical activity levels).

### *Self-reported measures*

Self-reported measures related to symptoms and their impact include the Swiss Spinal Stenosis Questionnaire<sup>27</sup>, global rating of change<sup>29</sup>, satisfaction with treatment using a 5 point scale constructed for the trial, health-related quality of life measured using the EQ-5D-5L<sup>30</sup>, and how well participants are managing their leg and back symptoms on a 10 point scale constructed for the trial.

Information is collected about cognitive and behavioural factors targeted during the intervention that are hypothesised to mediate effects of the intervention. Fear-avoidance is measured using the Fear Avoidance Beliefs Questionnaire<sup>31</sup>. Self-efficacy is measured from different perspectives. Participants rate their confidence to walk half a mile using a single item from the Modified Gait Self-efficacy Scale<sup>32</sup>. To understand maintenance of exercise and physical activity, drawing on theoretical and empirical literature on this topic<sup>33</sup>, participants also rate their confidence to restart their exercises having stopped them (self-efficacy recovery<sup>33 34</sup>), and their confidence to maintain their exercises in the long term (self-efficacy maintenance<sup>33 34</sup>). Measures related to the adherence of exercises and increasing physical activity are collected using the Index of Habit<sup>35</sup>, self-reported frequency of exercise and satisfaction with their attempts to increase their physical activity<sup>36</sup> measured on a 5 point scale constructed for the trial. Change in mobility in the last 6 months is measured using a 5 point scale constructed for the trial.

A range of measures are collected to capture constructs related to ageing. Frailty is measured using the Tilburg Frailty Index<sup>37</sup> and information about falls and fall related injuries is collected as recommended by the Prevention of Falls Network Europe (ProFANE)<sup>38</sup>. Beliefs about ageing are measured using the physical changes subscale of the Attitudes to Ageing Questionnaire<sup>23</sup>.

Health resource use will be collected using the Client Service Receipt Inventory<sup>39</sup>.

### *Physical assessment*

A measure of postural alignment is undertaken to quantify the degree of thoracic kyphosis<sup>40 41</sup>. The participant removes their shoes and socks and stands as upright as possible, with their sacrum and back against the wall, with hands by their sides. The researcher measures the distance from the spinous process of the seventh cervical vertebrae to the wall using a ruler. It is an alternative to the occiput to wall measurement, but reflects kyphosis better as it minimises error due to head position<sup>40 41</sup>.

We then collect measures related to mobility, balance and strength which are important targets of the intervention and markers related to ageing and frailty.

The Short Physical Performance Battery (SPPB)<sup>42</sup> measures three aspects of physical performance: standing balance, walking speed and the time taken to perform five chair stands. An overall score is given by adding the scores for each test. Researchers follow published guidance on the test which is, briefly, as follows<sup>42</sup>:

Standing balance

1  
2  
3 Standing balance is rated on a scale of 0-4 according to the participant's ability to maintain three test  
4 positions (side by side stance, semi-tandem and full tandem) for 10 seconds.

#### 5 6 Walking speed

7  
8 Walking speed is measured on an eight feet long walking course with no obstructions for a further  
9 two feet at each end. The participant is instructed to "Walk to the other end of the course at your  
10 usual speed, just as if you were walking down the street to go to the shop." The time taken for the  
11 participant to walk between the two markers is recorded to the nearest 0.1 seconds. The test is  
12 carried out twice and the faster of the two times is used to score the test on a scale of 0-4.

#### 13 14 15 Chair stands

16  
17 The participant sits in a straight-backed chair with their arms folded across their chest. They are  
18 given the following instructions: "Now stand up straight 5 times in succession, as fast as you can".  
19 The time taken to perform the 5 chair stands (from the initial sitting position to the final standing  
20 position at the end of the fifth stand) is used to score the test on a scale of 0-4. If the participant is  
21 unable to complete the test then they are given a score of 0.

22  
23  
24 The six minute walk test (6MWT)<sup>43</sup> measures the distance that the participant is able to walk in 6  
25 minutes. The researcher marks out an indoor walking course which is flat and straight and marked  
26 with cones at each end. The length of the test track is standardised at each site to ensure that the  
27 follow-up assessments are carried out on the same length test track. The recommended length of  
28 the course is a minimum of 10m in total but it is dependent on the space available at each site.

29  
30  
31 One lap consists of walking to the turnaround point of the course and returning to the start point.  
32 All researchers were provided with a 6MWT compact disc which is played during the test and counts  
33 down the 6 minutes of the walking test while the researcher counts the number of laps with a lap  
34 counter.

35  
36  
37 Prior to starting the test, the researcher also asks the participant if they have symptoms of NC. If  
38 they do not have any symptoms when starting, the participant is asked to verbally indicate if they  
39 begin to experience symptoms during the test. The distance at which their symptoms begin is  
40 recorded by the researcher.

41  
42 The researcher measures the participant's hand grip strength<sup>44</sup> using a Jamar + Dynamometer and  
43 follows the protocol outlined by Robert et al<sup>45</sup>. The participant is seated in a chair with arms, with  
44 their hips, knees and ankles at 90°, and their feet flat on the ground. The participant's arm is  
45 supported on the armrest with their wrists level with the end of the armrest. During the test the  
46 researcher supports the weight of the dynamometer. Using standardised instructions, the  
47 participant is instructed to squeeze the handle of the dynamometer until they reach a maximal  
48 contraction and hold for 5 seconds. The procedure is repeated on the other side. Three  
49 measurements are taken on each hand allowing at least 30 seconds rest between measurements on  
50 the same hand. The highest reading is used as the summary measure.

#### 51 52 53 **Follow up procedures**

54  
55 All participants are invited to attend a face-to face clinic appointment at six and 12 months. This is  
56 arranged by the researcher at each site. However, if a participant is unable to attend the clinic

1  
2  
3 appointment, they are mailed a questionnaire that contains the primary outcome, all self-reported  
4 items and a participant completed version of the Client Service Receipt Inventory, but excludes the  
5 physical assessment. If the questionnaire is not returned within two weeks then a second copy of  
6 the questionnaire is sent by the BOOST Trial Office as a reminder. If this is not returned within a  
7 further two weeks, then the BOOST Trial Office carry out a reminder phone call. After another two  
8 weeks, if the questionnaire has not been returned, then the BOOST Trial Office will attempt to  
9 contact the participant by telephone and collect core outcomes consisting of the primary outcome  
10 (ODI), pain troublesomeness rating, whether they are on a waiting list for spinal surgery, EQ-5D-5L,  
11 self-rated walking ability, falls and falls related fractures, self-reported exercise adherence, and a  
12 brief version of the Client Service Receipt Inventory.  
13  
14

### 15 **Adverse events**

16 A safety reporting protocol has been developed to manage the reporting of related and unexpected  
17 serious adverse events (SAEs) and directly attributable adverse events (AEs). An AE is any untoward  
18 medical occurrence in a participant during a trial. There may or may not be a causal relationship with  
19 the trial intervention. AEs may be identified by the physiotherapists delivering the trial treatments or  
20 by researchers conducting follow up assessments who have been trained in reporting procedures.  
21 SAEs must be reported to the Trial Management Team within 24 hours of the physiotherapist or  
22 researcher becoming aware of the event. The Chief Investigator determines whether AEs require  
23 reporting to the Ethics Committee, Data Monitoring and Ethics Committee (DMEC) and Trial  
24 Sponsor.  
25  
26  
27

### 28 **Training and quality assurance of the research protocol**

29 Researchers undergo approximately four hours of training covering eligibility screening, consent  
30 taking and data collection. They are provided with a manual containing detailed instructions for all  
31 trial procedures. All researchers undergo a quality assurance check to ensure they are following the  
32 trial protocol. This involves a BOOST team member observing the researcher carrying out the  
33 eligibility screening, taking consent and collecting trial data. Trial paper work is checked for  
34 completeness. If any deviations from the protocol are identified then further training is provided.  
35  
36  
37

### 38 **Study interventions**

#### 39 **Control intervention- best practice advice**

40 The control intervention is Best Practice Advice which is delivered in a one to one session with a  
41 physiotherapist. Participants attend an initial appointment of up to one hour consisting of an  
42 assessment followed by the provision of advice and education. Advice and education includes  
43 education about NC, being physically active, use of medications, when to seek more advice and,  
44 prescription of a home exercise programme (up to 4 exercises). Flexion and trunk stabilisation are  
45 recommended but the physiotherapist may prescribe other exercises based on their assessment, if  
46 required. The physiotherapist may prescribe a walking aid if the assessment indicates (e.g. to  
47 improve walking by increasing stability or for pain relief). Participants are provided with written  
48 information. Ideally, the control intervention should be delivered in one session. A maximum of two  
49 half hour review appointments is permitted. During these sessions they can re-enforce verbal advice  
50 given, and review walking aids or exercises provided in the initial session, but are not permitted to  
51 provide treatments such as manual therapy, electrotherapy, acupuncture, hydrotherapy or  
52 structured exercise sessions.  
53  
54  
55  
56  
57



1  
2  
3 The content of the control intervention has been informed by a survey of current physiotherapy  
4 practice<sup>46</sup> and through consultation with clinicians and patient representatives. Physiotherapy  
5 provision in the NHS is variable for this patient group. Many patients are not referred for  
6 physiotherapy, some receive advice on self-management at physiotherapy spinal clinics and some  
7 receive a course of physiotherapy comprising of advice and exercises. Comer et al<sup>8</sup> compared a  
8 single advice and education session with up to 6 sessions of standard physiotherapy and showed no  
9 difference in outcomes. We recommend that the majority of participants receive one session of  
10 advice and education as no additional benefit has been demonstrated from extra sessions of  
11 standard physiotherapy. However, there are situations where the treating physiotherapist will feel  
12 that a review appointment is necessary (e.g. if they have provided a walking aid and need to review  
13 its use) so this is permissible and we felt broadly reflected usual care in the NHS.  
14  
15

### 16 **Experimental intervention – The BOOST programme**

17 The BOOST programme will be described in full according to the TIDIER guidance<sup>47</sup> elsewhere,  
18 including the rationale and development. A brief summary is provided here.  
19  
20

21 Participants are invited to attend twelve 90 minute group sessions over a 12-week period. We  
22 recommend that one physiotherapist delivers the BOOST programme to a group of 6 participants. If  
23 larger groups are conducted then a physiotherapy assistant or another physiotherapist may be  
24 required. Prior to attending the programme, each participant attends an individual appointment (up  
25 to one hour) for an assessment and to set their individualised exercise and walking circuit targets for  
26 the group sessions. The baseline target for the strengthening exercise is tailored to each participant  
27 by varying the number of repetitions and sets, and the addition of weights as applicable.  
28  
29

30 Each session follows the same format. Participants take part in an education and discussion session,  
31 facilitated by the physiotherapist (30 minutes) and incorporating behavioural change strategies to  
32 encourage adherence with home exercises. This is followed by the exercise programme lasting  
33 approximately one hour. There is a short warm-up of seated exercises performed as a group which  
34 includes arm raises, trunk rotation, pelvic tilting and knee lifts. Then participants undertake a circuit  
35 of strengthening (sitting knee extension, sit to stand, standing hip abduction and standing hip  
36 extension), stretching (a combined hip flexor and calf stretch) and a balance exercise<sup>48,49</sup>. Each  
37 participant undertakes their individually tailored programme which is progressed over the 12 weeks.  
38 The strengthening exercises are progressed by increasing the number of repetitions and sets,  
39 increasing the load or adding speed. The final part of the exercise element is a supervised walking  
40 circuit, designed to improve walking ability and fitness<sup>48</sup> which is also progressed over the 12 weeks  
41 by increasing the distance walked, increasing walking speed, adding balance challenges such as stairs  
42 or obstacles or adding weights. The exercises carried out during the supervised sessions make up the  
43 home exercise programme (warm up, exercise circuit and walking).  
44  
45  
46  
47  
48

49 Participants attend the supervised sessions twice a week for sessions 1-6. As they progress through  
50 the programme attendance becomes less frequent (weekly for sessions 7-9, then fortnightly for  
51 sessions 10-12). The home exercise programme is introduced during Session 5 so that participants  
52 begin to undertake their home exercise programme while supported by the physiotherapist. On  
53 completion of the 12 group sessions, participants are asked to carry out their home exercise  
54 programme at least twice per week so that it becomes a habitual activity.  
55  
56  
57  
58  
59  
60

1  
2  
3 The physiotherapist monitors progress during the programme by asking participants to rate how  
4 well they feel they are managing their condition (0-10 Numerical Rating Scale) and how their  
5 symptoms are affecting walking (walking item from the Oswestry Disability Index) at the pre-group  
6 assessment, and at Sessions 3, 6, 9 and 12. At the end of the 12 week programme the  
7 physiotherapist carries out two follow-up telephone reviews with each participant to promote long  
8 term adherence with the home exercise programme. These take place approximately one and two  
9 months after completing the supervised sessions, and take approximately 15 minutes each.

### 12 **Concomitant care**

13 Participants may seek other forms of treatment during the trial if they feel it is necessary. Additional  
14 treatments accessed by participants, including contact with their GP or other health professionals,  
15 will be recorded on the Client Service Receipt Inventory<sup>39</sup> at follow up.

### 18 **Physiotherapist training and quality assurance of intervention delivery**

19 The interventions are delivered by physiotherapists registered with the Health and Care  
20 Professionals Council. All physiotherapists delivering the BOOST programme attend a one-day  
21 training course, are provided with an intervention manual and undertake three hours online  
22 training. All physiotherapists delivering the control intervention attend three hours of training and  
23 are provided with an intervention manual. At some sites, the same physiotherapist delivers both  
24 arms of the trial. Both interventions are delivered according to a manualised protocol to reduce the  
25 risk of introducing bias to the study and routine quality assurance checks are conducted. Visits are  
26 made to each site and at least one session of each intervention is observed. Feedback is provided to  
27 the physiotherapist on completion of the session and any issues or training needs identified. Another  
28 visit is arranged if substantial concerns are identified.

31 A structured check list is used to monitor intervention delivery and ensure that all elements of the  
32 interventions are delivered as intended. We developed the education and discussion session of the  
33 BOOST programme with the assistance of a CB Therapist who also assisted with training. The CB  
34 Therapist helped to develop the checklist for the BOOST programme to ensure all the necessary  
35 components of the education and discussion section of the session were covered. The checklist is  
36 completed during the observed session. The education and discussion session may also be assessed  
37 via recording (depending on resources and BOOST staff capacity). All participants provide consent  
38 for sessions to be recorded for quality assurance purposes when they enrol in the study and we seek  
39 verbal consent from the physiotherapist.

43 Following initial quality assurance checks and feedback, we also undertake fidelity assessments of  
44 both interventions that is not fed back to the physiotherapists. Feedback at this stage is not provided  
45 as we need to understand how this intervention would be delivered in the clinical setting if it were  
46 to be implemented.

49 A structured record of the interventions (treatment log) is completed by the physiotherapists and  
50 used to monitor fidelity. We collect attendance rates to monitor adherence with the interventions.  
51 Additional site visits will be conducted if any problems with intervention delivery are identified.

### 54 **Sample size**

55 At 80% power and 5% 2-sided significance levels, the proposed sample size is 321 participants in  
56 total providing data at 12-month follow-up (214 in the intervention arm and 107 in the control arm),  
57



1  
2  
3 after which inflation for potential loss to follow-up (20%) yields an overall target of 402 (268  
4 intervention, 134 control). If power is increased to 90%, then a sample size of 429 (286 in the  
5 intervention arm and 143 in the control arm) is required, after which inflation for potential loss to  
6 follow-up (20%) yields an overall target of 540 (360 intervention, 180 control).  
7

8 These calculations have been based on the assumption that a between-group difference of five  
9 points is considered clinically significant on the Oswestry Disability Index (ODI), with a baseline  
10 standard deviation of 15, consistent with published estimates in older populations and those with  
11 NC<sup>50 51</sup>. This yields a standardised difference of 0.33, a moderate effect size, which is consistent  
12 with being a reasonable target for a pragmatic trial<sup>52</sup>.  
13  
14

15 The loss to follow-up of 20% has been based on recent experiences of rehabilitation trials in older  
16 adults<sup>53</sup>. We estimate that the therapist effects will be negligible from data that we have  
17 generated/published from a series of trials using similar standardised interventions. Our recent trials  
18 of hand exercises in rheumatoid arthritis and cognitive behavioural interventions in low back pain  
19 generated an Intra Cluster Correlation (ICC) of less than 0.0001<sup>54 55</sup>. We anticipate about 20  
20 therapists delivering the intervention, treating an average of 12-15 participants each. We have not  
21 incorporated a formal inflation for a therapist effect as the loss to follow-up allowance is generous,  
22 and should mitigate against any moderate to large therapist effects.  
23  
24

25 The sample size is a minimum of 402 participants and a maximum of 540, to be finalised following a  
26 review of the sample size assumptions (in particular any evidence of clustering or a larger baseline  
27 standard deviation) by the DMEC. A number of assumptions in the sample size estimate will be  
28 checked at this interim time point and adaptations made if needed, including the baseline standard  
29 deviation of the ODI and the observed ICC. The DMEC will review these assumptions at this time-  
30 point and make recommendations regarding the final sample size to the Trial Management Group  
31 and Programme Steering Committee. No interim analysis of the primary outcome will be performed.  
32  
33  
34

## 35 Analysis

36 Data will be reported in accordance with the Consolidated Standards of Reporting Trials (CONSORT)  
37 guidelines for randomised controlled trials and the appropriate extensions<sup>56</sup>. A final statistical  
38 analysis plan will be developed by the end of the recruitment period, and we provide an outline  
39 description here. The primary analysis will be 'intention to treat', where participants will be included  
40 in their randomised groups. Effect estimates together with their 95% confidence intervals will be  
41 reported. The primary outcome, ODI at 12 months, will be analysed using a linear multivariable  
42 regression multi-level method to take account of any therapist effect and adjusted for the region,  
43 baseline ODI score, stratification and important prognostic variables.  
44  
45

46 Missing data will be minimised by careful data management and training. The nature and  
47 mechanism for missing variables and outcomes will be investigated, and if appropriate multiple  
48 imputation will be used. Sensitivity analyses will be undertaken, assessing the underlying missing  
49 data assumptions.  
50  
51

52 A secondary complier average causal effect (CACE) analysis<sup>57</sup> will explore the effect of adherence  
53 with the intervention (attendance and the participants' engagement with the programme rated by  
54 the physiotherapist<sup>58</sup>). For the purposes of the primary CACE analysis we will define adherence as  
55 attending at least 9 out of the 12 sessions (75%). This would ensure that the majority of  
56  
57

1  
2  
3 educational/discussion content is delivered. No one session is considered more important than  
4 another regarding educational/discussion content. Core CB concepts are introduced during the  
5 earlier sessions, are re-iterated during subsequent sessions so attendance at 9 sessions would  
6 ensure all core content is covered. Attendance at nine sessions will ensure that the participant is  
7 introduced to the home exercise programme and has undertaken the exercise programme for a  
8 minimum of six weeks (Sessions 1 -9 are delivered over a 6 week period). Six weeks of strength  
9 training has been shown to be sufficient to result in short term improvements in muscle strength  
10 and physical function<sup>59-61</sup>.

11  
12  
13 We have also defined *a priori* subgroup criteria based on the published literature and will explore  
14 treatment effects by age (65-74 years/75 years +), gender (male/female), Tilberg Frailty Index scores  
15 (0-4/5+<sup>37</sup>), Fear Avoidance Beliefs Questionnaire scores (0-14/15+<sup>62</sup>), STartBack Risk Stratification  
16 score low/medium/high risk groups<sup>21</sup>), hand grip strength (men: <30/30+; women<20/20+<sup>63</sup>) and  
17 Short Physical Performance Battery Scores (SPPB 0-6 Low performance; SPPB 7-9 Intermediate  
18 performance; SPPB 10-12 High Performance<sup>63</sup>) Amongst participants that have an MRI scan prior to  
19 randomisation, we will estimate treatment effects in two-sub-groups defined by MRI parameters  
20 (cross-sectional spinal canal area cut-point of 100mm<sup>2</sup><sup>26</sup>). Subgroup effects will be analysed using  
21 interaction with treatment tests and will be displayed using forest plots<sup>64</sup>.

22  
23  
24  
25 We will carry out a series of additional exploratory sub-group and interaction analyses to identify  
26 other MRI scan parameters and baseline factors that predict change in ODI scores between baseline  
27 and 12 months. Interaction and polynomial terms will be considered when carrying out the  
28 exploratory analysis, and the analyses may be based on continuous or binary cut-points. These  
29 models will report variables that predict the outcome at 12 months with 95% confidence intervals  
30 and p-value. These additional analyses will be presented in secondary publications and with  
31 appropriate caveats about the interpretation of exploratory sub-group analyses.

32  
33  
34 Further supplementary analysis may include mediation analysis to evaluate treatment mechanisms,  
35 and exploratory analyses of exercise dose effects including profiling of treatment response  
36 trajectories. These are *a priori* analyses based on the logic model used to develop the intervention,  
37 and will examine (a) whether the intervention affects hypothesised mediators as intended, (b)  
38 whether changes in hypothesised mediators relate to changes in outcomes, and (c) whether effects  
39 of intervention on outcomes is attributable to changes in the hypothesised causal pathway.

## 40 41 42 **Economic evaluation**

43 A prospective economic evaluation, conducted from an NHS and personal social services (PSS)  
44 perspective, is integrated into the trial design. The economic evaluation will estimate the difference  
45 in the cost of resources used by participants in the two arms of the trial, enabling costs and  
46 consequences to be compared between alternative forms of physiotherapy. The economic  
47 assessment method will adhere to the recommendations of the NICE Reference Case<sup>65</sup>.

48  
49  
50 We will estimate the costs of delivering the intervention, including development and training, the  
51 cost of delivering sessions, and participant follow-up/management. Broader resource utilisation is  
52 captured through two principal sources: (i) participant interview administered at 6 and 12 months  
53 post-randomisation and (ii) routine health service data collection systems (Hospital Episode  
54 Statistics). Unit costs for health and social care resources will be derived from local and national  
55  
56  
57

sources<sup>66</sup>. Costs will be standardised to current prices where possible. Health-related quality of life will be measured at baseline and at 6 and 12 months post-randomisation using the generic EuroQol EQ-5D-5L; national tariff sets will be used to generate quality-adjusted life-years (QALYs)<sup>67-69</sup>. We will in the first instance use self-report of the EuroQol EQ-5D-5L measure. Multiple imputation methods will be used to impute missing data and avoid biases associated with complete case analysis<sup>70</sup>. The results of the economic evaluation will be expressed in terms of incremental cost per QALY gained. Non-parametric bootstrap estimation will be used to derive 95% confidence intervals for mean cost and QALY differences between the trial groups, as well as to populate a cost-effectiveness plane. A series of sensitivity analyses will be undertaken to explore the implications of uncertainty on the incremental cost-effectiveness ratios and to consider the broader issue of the generalisability of the study results. The full details of the economic evaluation will be described in the health economic analysis plan.

### Qualitative study

The aims of the qualitative study are to better understand participant experiences both of living and ageing with NC, and their experience of the interventions delivered during the trial. Understanding the experiences of the participants will inform strategies for implementation if the intervention is clinically effective.

All participants recruited to the trial are eligible. As part of the consent process for the trial, participants are informed about the interview study and asked if they are willing to be contacted by a researcher to receive more information. Participants who agree are provided with an additional information sheet and contacted by the qualitative research team. Prior to starting the first interview, written consent is sought. Consent is reaffirmed verbally prior to each follow up telephone interviews.

We are interviewing participants at three time points over the course of the trial in order to capture physical, psychological, social and contextual change. Topics explored include current impact of NC on day-to-day life and wellbeing, beliefs about the role of exercise in ameliorating symptoms, the role of exercise on slowing/reversing physical decline, and how these beliefs impact on adherence to the treatments.

We estimate 60 participants will be required to ensure data saturation is reached in all three interviews whilst ensuring diversity of participants by age, gender, ethnicity, and intervention arm, allowing for attrition over the course of the study<sup>71 72</sup>. In any one recruitment site interview participants are recruited consecutively, and as recruitment proceeds sampling is adjusted to ensure diversity of age, gender, ethnicity and intervention arm.

Interviews are semi-structured using pre-specified open-ended questions. The interviewer uses prompts to further investigate responses, and allows the participant to explore topics they feel are relevant<sup>71 73</sup>. The first interview takes place at a location convenient to the participant, usually their home. The second and third interviews are telephone interviews to reduce resource implications for the project. However, if a telephone conversation is unfeasible (e.g. poor hearing) then subsequent interviews are conducted face-to-face.

The first interview takes place between randomisation and starting treatment. Participants do not yet know their treatment allocation. Questions focus on the impact of NC on the participant's

1  
2  
3 physical and psychosocial health, their beliefs around exercise and ageing, and concerns and hopes  
4 regarding the intervention. The interview takes up to 90 minutes, and is audio recorded.  
5

6 The second interview is approximately one month after completing treatment. Topics explored  
7 include the participant's experiences of the intervention, adherence to home exercises, and any  
8 changes in their symptoms, exercise and aging beliefs, physical activity levels, or life circumstances.  
9 The third interview coincides with the 12-month follow-up assessment and further explores these  
10 topics, and how they may have changed after an extended period of self-management. Interview  
11 schedules are adapted to account for data captured in earlier interviews, and the interviewer has  
12 access to the outcome measures for each interviewee for exploration during the interview. The  
13 telephone interviews are recorded, and notes are transcribed by the interviewer from the audio  
14 recordings.  
15  
16

17 Audio recordings of first interviews are transcribed verbatim by an independent transcriber,  
18 anonymised and allocated an ID number. The telephone interview notes are checked against the  
19 audio-recordings, and linked to the first interview through the ID number. Participants are sent a  
20 copy of the transcripts if requested, and may delete any information they would not like to be used.  
21  
22

23 All transcripts are imported into NVivo and analysed using thematic analysis<sup>74</sup>. Coding is undertaken  
24 as each transcript is received. We will undertake cross-case analysis<sup>75</sup> To understand trajectories of  
25 change in relation to back pain and NC we will undertake longitudinal case comparative analysis, an  
26 approach to analysis used previously by the research team<sup>76</sup>.  
27  
28

### 29 **Trial management**

30 This trial is run by a UKCRC fully registered clinical trials unit, according to approved and audited  
31 standard operating procedures. All trial staff undergo regular training to ensure they are compliant  
32 with Good Clinical Practice and other relevant legislation and the requirements such as the Data  
33 Protection Act.  
34  
35

### 36 **Data management and checking**

37 All data is processed according to the Data Protection Act 1998 and all documents are stored safely  
38 in confidential conditions. Each participant is provided with a unique trial identification number.  
39 Data is entered manually onto the trial database (OpenClinica). The BOOST Trial Office review all  
40 data collection forms for completeness and accuracy using automated validation checks, querying  
41 missing and nonsensical data with sites, according to trial specific procedures which have been  
42 developed to ensure data quality.  
43  
44

### 45 **Patient and Public Involvement**

46  
47 During the application process for this trial, we assembled a Patient and Public Involvement group  
48 and we have continued to work closely with them. Ms Judith Fitch is the lead PPI representative and  
49 a co-applicant and contributed to the design of the trial. We appointed a PPI representative to be an  
50 independent member of the Programme Steering Committee. PPI engagement has been undertaken  
51 in face-to-face meetings and via emails and phone calls to make it as convenient as possible for the  
52 PPI group to contribute. PPI representatives have assisted with the development of the  
53 physiotherapy intervention. Two PPI representatives attended the intervention development day  
54 along with clinicians and researchers. One PPI representative carried out the proposed exercise  
55  
56  
57  
58  
59  
60

1  
2  
3 programme in her home so she could give feedback on the practicalities of performing the proposed  
4 programme. PPI representatives helped us to develop the patient materials for the intervention.  
5 Participant information leaflets, consent forms and posters advertising the trial have been reviewed  
6 by the PPI group and they have provided feedback on layout and wording. We have piloted  
7 questionnaires with our PPI group. PPI representatives have helped with developing interview  
8 schedules for the qualitative study and we will carry out some practice interviews with the PPI  
9 representatives prior to undertaking the actual study.  
10  
11

## 12 Ethics and dissemination

13 Ethics approval for the BOOST trial was given by the National Research Ethics Committee (REC  
14 number 16/LO/0349), on 03 March 2016. Site specific approvals were provided by NHS Research and  
15 Development Departments at each participating site. The Chief Investigator will submit and, where  
16 necessary, obtain approval from the above parties for all substantial amendments to the original  
17 approved documents.  
18  
19

20  
21 There were several ethical issues when designing this study. A study of older adults may identify  
22 individuals with previously unidentified cognitive impairment. As part of the screening process,  
23 participants complete the Abbreviated Mental Test. Individuals with a score of 6 or below (out of 10)  
24 are excluded as this suggests impaired cognitive function requiring further assessment<sup>15-17</sup>. The  
25 researchers, conducting the eligibility screening, are trained to deal with this and to recommend that  
26 the person visit their GP to for further assessment.  
27  
28

29 The study screening procedures may identify individuals who have signs of serious spinal pathology  
30 (e.g. cauda equina syndrome). In this case, the researcher would discuss it with the participant and  
31 as soon as possible with the local Principal Investigator and/or patient's spinal consultant or GP and  
32 take appropriate action.  
33

34 Some participants will undergo an MRI scan as a research investigation. Some participants may want  
35 the results of their scan. However, as participants would not have had access to a scan as part of  
36 their routine NHS care, we will only make results available at the end of the trial unless we detect a  
37 serious spinal pathology (e.g. spinal malignancy). In this situation, the participant's GP or Spinal  
38 Consultant will be informed immediately. If we were to provide the scan results, this may influence  
39 the beliefs of participants and their clinicians about the value of different treatments. This process is  
40 made clear to potential participants during the recruitment and consent procedures so participants  
41 understand the purpose of the MRI scan.  
42  
43  
44

45 The Programme Steering Committee (PSC) provides overall supervision of this research on behalf of  
46 the funder. It is comprised of the Chief Investigator, Project Lead, Trial Manager, Statistician and four  
47 independent members (including the committee chair). The PSC monitors trial progress and conduct  
48 and provides expert advice. In addition, a DMEC has been appointed. The DMEC consists of three  
49 independent experts with relevant clinical research and statistical experience. The DMEC has  
50 adopted a DAMOCLES charter<sup>77</sup> which defines its terms of reference and operation in relation to  
51 oversight of the trial. No interim outcome analysis is planned. Direct access to research data will be  
52 granted to authorised representatives of the Sponsor (University of Oxford), regulatory authorities  
53 or the host institution for monitoring and/or auditing of the study to ensure compliance with  
54 regulations.  
55  
56  
57  
58  
59  
60

1  
2  
3 The results will be published in a peer-reviewed journal and at conferences as well as in a report to  
4 the funder. A plain English summary will be made available on the BOOST website for participants  
5 (<https://boost.octru.ox.ac.uk/>).  
6  
7

## 8 **Contributors**

9  
10 EW is the lead author of this manuscript. LW, SD, KV, RG, SP and SL were involved in writing the  
11 manuscript. All authors have read and approved the final manuscript. SL is the Chief Investigator and  
12 the guarantor. EW, FG, SP, CH, NA, KB, JB, GC, JF, JF, DF, ZH and CM are co-applicants on the grant  
13 awarded by the NIHR Programme Grants for Applied Research (reference: PTC-RP-PG-0213-20002)  
14 and were involved in the design of the study and its implementation, as were AG as trial manager,  
15 AM as a research associate, SD and KV as trial statisticians, GB and VG as research physiotherapists,  
16 LW as the postdoctoral researcher responsible for the qualitative study, RG as the clinical research  
17 fellow (radiology) and BP as the trial health economist.  
18  
19

## 20 **Acknowledgments**

21 Thank you to the Patient and Public Involvement Representatives that have provided advice and  
22 feedback on the development of the intervention, patient materials and conduct of the trial.  
23  
24

## 25 **Funding**

26 This research is funded by the NIHR Programme Grants for Applied Research (reference: PTC-RP-PG-  
27 0213-20002). Preparatory work for the programme of research was supported by the Collaboration  
28 for Leadership in Applied Health Research and Care Oxford at Oxford Health NHS Foundation Trust.  
29 SL and EW receive funding from the Collaboration for Leadership in Applied Health Research and  
30 Care Oxford at Oxford Health NHS Foundation Trust and are supported by the NIHR Biomedical  
31 Research Centre, Oxford. CDM is funded by the NIHR Collaborations for Leadership in Applied Health  
32 Research and Care West Midlands, the NIHR School for Primary Care Research and a NIHR Research  
33 Professorship in General Practice (NIHR-RP-2014-04-026).  
34  
35  
36

## 37 **Disclaimer**

38 The views expressed are those of the author(s) and not necessarily those of the NHS, the NIHR or the  
39 Department of Health. The trial sponsor is the University of Oxford. The sponsor has no role in the  
40 trial design; collection, management, analysis or interpretation of data; writing of reports and  
41 submission for publication.  
42  
43

## 44 **Competing interests**

45 None declared.  
46

## 47 **Provenance and peer review**

48 This protocol was peer reviewed for ethical and funding approval prior to submission.  
49

## 50 **Data sharing statement**

51 The relevant anonymised patient level data will be made available on reasonable request from the  
52 authors following full reporting of the trial results and planned additional analyses.  
53  
54  
55  
56  
57  
58  
59  
60



## References

1. Ishimoto Y, Yoshimura N, Muraki S, et al. Prevalence of symptomatic lumbar spinal stenosis and its association with physical performance in a population-based cohort in Japan: the Wakayama Spine Study. *Osteoarthritis Cartilage* 2012;20(10):1103-8. doi: 10.1016/j.joca.2012.06.018
2. Suri P, Rainville J, Kalichman L, et al. Does this older adult with lower extremity pain have the clinical syndrome of lumbar spinal stenosis? *JAMA* 2010;304(23):2628-36. doi: 10.1001/jama.2010.1833
3. de Schepper EI, Overvest GM, Suri P, et al. Diagnosis of Lumbar Spinal Stenosis: An Updated Systematic Review of the Accuracy of Diagnostic Tests. *Spine (Phila Pa 1976)* 2013;38(8):E469-E81. doi: 10.1097/BRS.0b013e31828935ac
4. Deyo RA, Mirza SK, Martin BI, et al. Trends, major medical complications, and charges associated with surgery for lumbar spinal stenosis in older adults. *JAMA* 2010;303(13):1259-65. doi: 10.1001/jama.2010.338
5. Kovacs FM, Urrútia G, Alarcón JD. Surgery versus conservative treatment for symptomatic lumbar spinal stenosis: a systematic review of randomized controlled trials. *Spine (Phila Pa 1976)* 2011;36(20):E1335-51. doi: 10.1097/BRS.0b013e31820c97b1
6. Zaina F, Tomkins-Lane C, Carragee E, et al. Surgical versus non-surgical treatment for lumbar spinal stenosis. *Cochrane Database Syst Rev* 2016(1):Cd010264. doi: 10.1002/14651858.CD010264.pub2 [published Online First: 2016/01/30]
7. Kreiner DS, Shaffer WO, Baisden J, et al. Evidence-based clinical guidelines for multidisciplinary spine care: diagnosis and treatment of degenerative lumbar spinal stenosis: North American Spine Society, 2011.
8. Comer C, Redmond AC, Bird HA, et al. A home exercise programme is no more beneficial than advice and education for people with neurogenic claudication: results from a randomised controlled trial. *PLoS One* 2013;8(9):e72878. doi: 10.1371/journal.pone.0072878
9. Ammendolia C, Stuber KJ, Rok E, et al. Nonoperative treatment for lumbar spinal stenosis with neurogenic claudication. *Cochrane Database Syst Rev* 2013;8:CD010712. doi: 10.1002/14651858.CD010712
10. May S, Comer C. Is surgery more effective than non-surgical treatment for spinal stenosis, and which non-surgical treatment is more effective? A systematic review. *Physiotherapy* 2013;99:12-20. doi: 10.1016/j.physio.2011.12.004
11. Jarrett MS, Orlando JF, Grimmer-Somers K. The effectiveness of land based exercise compared to decompressive surgery in the management of lumbar spinal-canal stenosis: a systematic review. *BMC Musculoskelet Disord* 2012;13:30. doi: 10.1186/1471-2474-13-30
12. Iversen M, Choudhary V, Patel S. Therapeutic exercise and manual therapy for person with lumbar spinal stenosis. *Int J Clin Rheumatol* 2010;5(4):425-37.
13. Macedo LG, Hum A, Kuleba L, et al. Physical Therapy Interventions for Degenerative Lumbar Spinal Stenosis: A Systematic Review. *Phys Ther* 2013 doi: 10.2522/ptj.20120379
14. Qureshi KN, Hodkinson HM. Evaluation of a ten-question mental test in the institutionalized elderly. *Age Ageing* 1974;3(3):152-7. [published Online First: 1974/08/01]
15. Sheehan B. Assessment scales in dementia. *Ther Adv Neurol Disord* 2012;5(6):349-58. doi: 10.1177/1756285612455733 [published Online First: 2012/11/10]
16. Foroughan M, Wahlund LO, Jafari Z, et al. Validity and reliability of Abbreviated Mental Test Score (AMTS) among older Iranian. *Psychogeriatrics* 2017 doi: 10.1111/psyg.12276 [published Online First: 2017/06/08]
17. Sarasqueta C, Bergareche A, Arce A, et al. The validity of Hodkinson's Abbreviated Mental Test for dementia screening in Guipuzcoa, Spain. *Eur J Neurol* 2001;8(5):435-40. [published Online First: 2001/09/14]

18. Kuorinka I, Jonsson B, Kilbom A, et al. Standardised Nordic questionnaires for the analysis of musculoskeletal symptoms. *Appl Ergon* 1987;18(3):233-7. [published Online First: 1987/09/01]
19. Parsons S, Breen A, Foster NE, et al. Prevalence and comparative troublesomeness by age of musculoskeletal pain in different body locations. *Fam Pract* 2007;24(4):308-16. doi: 10.1093/fampra/cmm027 [published Online First: 2007/07/03]
20. Syddall HE, Westbury LD, Cooper C, et al. Self-reported walking speed: a useful marker of physical performance among community-dwelling older people? *J Am Med Dir Assoc* 2015;16(4):323-8. doi: 10.1016/j.jamda.2014.11.004 [published Online First: 2014/12/20]
21. Hill JC, Dunn KM, Lewis M, et al. A primary care back pain screening tool: identifying patient subgroups for initial treatment. *Arthritis Rheum* 2008;59(5):632-41. doi: 10.1002/art.23563 [published Online First: 2008/04/29]
22. Resnick B, Jenkins LS. Testing the reliability and validity of the Self-Efficacy for Exercise scale. *Nurs Res* 2000;49(3):154-9. [published Online First: 2000/07/06]
23. Laidlaw K, Power MJ, Schmidt S. The Attitudes to Ageing Questionnaire (AAQ): development and psychometric properties. *Int J Geriatr Psychiatry* 2007;22(4):367-79. doi: 10.1002/gps.1683 [published Online First: 2006/10/20]
24. Moon ES, Kim HS, Park JO, et al. Comparison of the predictive value of myelography, computed tomography and MRI on the treadmill test in lumbar spinal stenosis. *Yonsei Med J* 2005;46(6):806-11.
25. Ishimoto Y, Yoshimura N, Muraki S, et al. Associations between radiographic lumbar spinal stenosis and clinical symptoms in the general population: the Wakayama Spine Study. *Osteoarthritis Cartilage* 2013;21(6):783-8. doi: 10.1016/j.joca.2013.02.656
26. Steurer J, Roner S, Gnannt R, et al. Quantitative radiologic criteria for the diagnosis of lumbar spinal stenosis: a systematic literature review. *BMC Musculoskelet Disord* 2011;12:175. doi: 10.1186/1471-2474-12-175 [published Online First: 2011/07/28]
27. Cleland JA, Whitman JM, Houser JL, et al. Psychometric properties of selected tests in patients with lumbar spinal stenosis. *Spine J* 2012;12(10):921-31. doi: 10.1016/j.spinee.2012.05.004
28. Fairbank JC. Why are there different versions of the Oswestry Disability Index? *J Neurosurg Spine* 2014;20(1):83-6. doi: 10.3171/2013.9.spine13344 [published Online First: 2013/11/12]
29. Kamper SJ, Maher CG, Mackay G. Global rating of change scales: a review of strengths and weaknesses and considerations for design. *J Man Manip Ther* 2009;17(3):163-70.
30. Herdman M, Gudex C, Lloyd A, et al. Development and preliminary testing of the new five-level version of EQ-5D (EQ-5D-5L). *Qual Life Res* 2011;20(10):1727-36. doi: 10.1007/s11136-011-9903-x
31. Waddell G, Newton M, Henderson I, et al. A Fear-Avoidance Beliefs Questionnaire (FABQ) and the role of fear-avoidance beliefs in chronic low back pain and disability. *Pain* 1993;52(2):157-68.
32. Newell AM, VanSwearingen JM, Hile E, et al. The modified Gait Efficacy Scale: establishing the psychometric properties in older adults. *Phys Ther* 2012;92(2):318-28. doi: 10.2522/ptj.20110053 [published Online First: 2011/11/15]
33. Kassavou A, Turner A, Hamborg T, et al. Predicting maintenance of attendance at walking groups: Testing constructs from three leading maintenance theories. *Health Psychol* 2014;33(7):752-6. doi: 10.1037/hea0000015 [published Online First: 2013/11/20]
34. Luszczynska A, Schwarzer R, Lippke S, et al. Self-efficacy as a moderator of the planning-behaviour relationship in interventions designed to promote physical activity. *Psychol Health* 2011;26(2):151-66. doi: 10.1080/08870446.2011.531571 [published Online First: 2011/02/15]
35. Verplanken B, Orbell S. Reflections on Past Behavior: A Self-Report Index of Habit Strength. *Health Psychol* 2003;22(3):313-30.



- 1
- 2
- 3 36. Rothman AJ, Baldwin AS, Hertel AW, et al., editors. *Self-Regulation and Behavior Change: Disentangling Behavioral Initiation and Behavioral Maintenance*. New York: Guilford Press, 2011.
- 4
- 5
- 6 37. Gobbens RJ, van Assen MA, Luijkx KG, et al. The Tilburg Frailty Indicator: psychometric properties. *J Am Med Dir Assoc* 2010;11(5):344-55. doi: 10.1016/j.jamda.2009.11.003
- 7
- 8 38. Lamb SE, Jørstad-Stein EC, Hauer K, et al. Development of a common outcome data set for fall injury prevention trials: the Prevention of Falls Network Europe consensus. *J Am Geriatr Soc* 2005;53(9):1618-22. doi: 10.1111/j.1532-5415.2005.53455.x
- 9
- 10 39. Beecham J, Knapp M. Costing psychiatric interventions: Gaskell London 2001.
- 11 40. Wongsu S, Amatachaya P, Saengsuwan J, et al. Concurrent Validity of Occiput-Wall Distance to Measure Kyphosis in Communities. *J Clin Trials* 2012;2(2)
- 12 41. Viitanen JV, Heikkilä S, Kokko ML, et al. Clinical assessment of spinal mobility measurements in ankylosing spondylitis: a compact set for follow-up and trials? *Clin Rheumatol* 2000;19(2):131-7. [published Online First: 2000/05/03]
- 13 42. Guralnik JM, Simonsick EM, Ferrucci L, et al. A short physical performance battery assessing lower extremity function: association with self-reported disability and prediction of mortality and nursing home admission. *J Gerontol* 1994;49(2):M85-94. [published Online First: 1994/03/01]
- 14 43. Bennell K, Dobson F, Hinman R. Measures of Physical Performance Assessments. *Arthritis Care and Research* 2011;63(S11):S350-S70.
- 15 44. Roberts HC, Syddall HE, Cooper C, et al. Is grip strength associated with length of stay in hospitalised older patients admitted for rehabilitation? Findings from the Southampton grip strength study. *Age Ageing* 2012;41(5):641-6. doi: 10.1093/ageing/afs089
- 16 45. Roberts HC, Denison HJ, Martin HJ, et al. A review of the measurement of grip strength in clinical and epidemiological studies: towards a standardised approach. *Age Ageing* 2011;40(4):423-9. doi: 10.1093/ageing/afr051 [published Online First: 2011/06/01]
- 17 46. Comer CM, Redmond AC, Bird HA, et al. Assessment and management of neurogenic claudication associated with lumbar spinal stenosis in a UK primary care musculoskeletal service: a survey of current practice among physiotherapists. *BMC Musculoskelet Disord* 2009;10:121. doi: 10.1186/1471-2474-10-121
- 18 47. Hoffmann TC, Glasziou PP, Boutron I, et al. Better reporting of interventions: template for intervention description and replication (TIDieR) checklist and guide. *Bmj* 2014;348:g1687. doi: 10.1136/bmj.g1687 [published Online First: 2014/03/13]
- 19 48. Physical activity programs and behavior counseling in older adult populations. *Med Sci Sports Exerc* 2004;36(11):1997-2003. [published Online First: 2004/10/30]
- 20 49. Byrne C, Faure C, Keene DJ, et al. Ageing, Muscle Power and Physical Function: A Systematic Review and Implications for Pragmatic Training Interventions. *Sports Med* 2016;46(9):1311-32. doi: 10.1007/s40279-016-0489-x
- 21 50. Whitman JM, Flynn TW, Childs JD, et al. A comparison between two physical therapy treatment programs for patients with lumbar spinal stenosis: a randomized clinical trial. *Spine (Phila Pa 1976)* 2006;31(22):2541-9. doi: 10.1097/01.brs.0000241136.98159.8c
- 22 51. Pua YH, Cai CC, Lim KC. Treadmill walking with body weight support is no more effective than cycling when added to an exercise program for lumbar spinal stenosis: a randomised controlled trial. *Aust J Physiother* 2007;53(2):83-9.
- 23 52. Altman D. Practical statistics for medical research. London: Chapman & Hall/CRC 1991.
- 24 53. Lamb SE, Williamson EM, Heine PJ, et al. Exercises to improve function of the rheumatoid hand (SARAH): a randomised controlled trial. *Lancet* 2014 doi: 10.1016/s0140-6736(14)60998-3 [published Online First: 2014/10/14]
- 25 54. Williams MA, Williamson EM, Heine PJ, et al. Strengthening And stretching for Rheumatoid Arthritis of the Hand (SARAH). A randomised controlled trial and economic evaluation. *Health Technol Assess* 2015;19(19):1-222. doi: 10.3310/hta19190 [published Online First: 2015/03/10]
- 26
- 27
- 28
- 29
- 30
- 31
- 32
- 33
- 34
- 35
- 36
- 37
- 38
- 39
- 40
- 41
- 42
- 43
- 44
- 45
- 46
- 47
- 48
- 49
- 50
- 51
- 52
- 53
- 54
- 55
- 56
- 57
- 58
- 59
- 60

- 1  
2  
3 55. Lamb SE, Lall R, Hansen Z, et al. A multicentred randomised controlled trial of a primary  
4 care-based cognitive behavioural programme for low back pain. The Back Skills Training  
5 (BeST) trial. *Health Technol Assess* 2010;14(41):1-253, iii-iv. doi: 10.3310/hta14410  
6 56. Schulz KF, Altman DG, Moher D, et al. CONSORT 2010 Statement: updated guidelines for  
7 reporting parallel group randomised trials. *BMC Med* 2010;8:18. doi: 10.1186/1741-  
8 7015-8-18  
9 57. Dunn G, Maracy M, Dowrick C, et al. Estimating psychological treatment effects from a  
10 randomised controlled trial with both non-compliance and loss to follow-up. *Br J*  
11 *Psychiatry* 2003;183:323-31.  
12 58. Bellg AJ, Borrelli B, Resnick B, et al. Enhancing treatment fidelity in health behavior change  
13 studies: best practices and recommendations from the NIH Behavior Change  
14 Consortium. *Health Psychol* 2004;23(5):443-51. doi: 10.1037/0278-6133.23.5.443  
15 [published Online First: 2004/09/16]  
16 59. Emerson NS, Stout JR, Fukuda DH, et al. Resistance training improves capacity to delay  
17 neuromuscular fatigue in older adults. *Arch Gerontol Geriatr* 2015;61(1):27-32. doi:  
18 10.1016/j.archger.2015.04.002 [published Online First: 2015/05/10]  
19 60. Scanlon TC, Fragala MS, Stout JR, et al. Muscle architecture and strength: adaptations to  
20 short-term resistance training in older adults. *Muscle Nerve* 2014;49(4):584-92. doi:  
21 10.1002/mus.23969 [published Online First: 2013/07/31]  
22 61. Fragala MS, Fukuda DH, Stout JR, et al. Muscle quality index improves with resistance  
23 exercise training in older adults. *Exp Gerontol* 2014;53:1-6. doi:  
24 10.1016/j.exger.2014.01.027 [published Online First: 2014/02/11]  
25 62. Crombez G, Vlaeyen JW, Heuts PH, et al. Pain-related fear is more disabling than pain itself:  
26 evidence on the role of pain-related fear in chronic back pain disability. *Pain* 1999;80(1-  
27 2):329-39.  
28 63. Cruz-Jentoft AJ, Baeyens JP, Bauer JM, et al. Sarcopenia: European consensus on definition  
29 and diagnosis: Report of the European Working Group on Sarcopenia in Older People.  
30 *Age Ageing* 2010;39(4):412-23. doi: 10.1093/ageing/afq034 [published Online First:  
31 2010/04/16]  
32 64. Brookes ST, Whitley E, Peters TJ, et al. Subgroup analyses in randomised controlled trials:  
33 quantifying the risks of false-positives and false-negatives. *Health Technol Assess*  
34 2001;5(33):1-56. [published Online First: 2001/11/10]  
35 65. NICE. Guide to the methods of technology appraisal In: Excellence NifHaC, ed.: NICE, 2013.  
36 66. Graves N, Walker D, Raine R, et al. Cost data for individual patients included in clinical  
37 studies: no amount of statistical analysis can compensate for inadequate costing  
38 methods. *Health Econ* 2002;11(8):735-9. doi: 10.1002/hec.683  
39 67. Dolan P. Modeling valuations for EuroQol health states. *Med Care* 1997;35(11):1095-108.  
40 68. van Hout B, Janssen MF, Feng YS, et al. Interim scoring for the EQ-5D-5L: mapping the EQ-  
41 5D-5L to EQ-5D-3L value sets. *Value Health* 2012;15(5):708-15. doi:  
42 10.1016/j.jval.2012.02.008  
43 69. Brazier J, Roberts J, Deverill M. The estimation of a preference-based measure of health from  
44 the SF-36. *J Health Econ* 2002;21(2):271-92.  
45 70. Sterne JA, White IR, Carlin JB, et al. Multiple imputation for missing data in epidemiological  
46 and clinical research: potential and pitfalls. *BMJ* 2009;338:b2393.  
47 71. Britten N. Qualitative interviews in medical research. *BMJ* 1995;311(6999):251-3.  
48 72. Morse JM. Determining sample size. *Qualitative Health Research* 2000;10(1):3-5.  
49 73. Cohen D, Crabtree B. Semi-structured Interviews. Qualitative research guidelines project,  
50 2006.  
51 74. Braun V, Clarke V. Using thematic analysis in psychology. *Qualitative Research in Psychology*  
52 2006;3(2):77-101.  
53 75. Miles M, Huberman A. Qualitative data analysis. Second edition ed. Thousand Oaks: SAGE  
54 Publications Ltd 1994.  
55 76. Griffiths F, Borkan J, Byrne D, et al. Time, complexity and chronic back pain: a longitudinal  
56 qualitative study.: North America Primary Care Research Group., 2009.  
57  
58  
59

- 1  
2  
3 77. DAMOCLES-Study-Group. A proposed charter for clinical trial data monitoring committees:  
4 helping them to do their job well. *Lancet* 2005;365(9460):711-22. doi: 10.1016/s0140-  
5 6736(05)17965-3 [published Online First: 2005/02/22]
- 6 78. Guralnik JM, Fried LP, Simonsick EM, et al. The Women's Health and Aging Study: Health and  
7 Social Characteristics of Older Women with Disability. Bethesda, MD: National Institute  
8 of Aging, 1995.
- 9 79. Parsons S, Carnes D, Pincus T, et al. Measuring troublesomeness of chronic pain by location.  
10 *BMC Musculoskelet Disord* 2006;7:34. doi: 10.1186/1471-2474-7-34 [published Online  
11 First: 2006/04/07]
- 12 80. Shival K, Kohl HW, 3rd, Bernstein I, et al. Sedentary behaviour and physical inactivity  
13 assessment in primary care: the Rapid Assessment Disuse Index (RADI) study. *Br J*  
14 *Sports Med* 2014;48(3):250-5. doi: 10.1136/bjsports-2013-092901 [published Online  
15 First: 2013/10/23]
- 16 81. **Fishbein M, Ajzen I. Predicting and changing behavior: The reasoned action approach.**  
17 New York: Psychology Press 2010.
- 18 82. Guralnik JM, Ferrucci L, Pieper CF, et al. Lower extremity function and subsequent disability:  
19 consistency across studies, predictive models, and value of gait speed alone compared  
20 with the short physical performance battery. *J Gerontol A Biol Sci Med Sci*  
21 2000;55(4):M221-31. [published Online First: 2000/05/16]
- 22 83. Pratt RK, Fairbank JC, Virr A. The reliability of the Shuttle Walking Test, the Swiss Spinal  
23 Stenosis Questionnaire, the Oxford Spinal Stenosis Score, and the Oswestry Disability  
24 Index in the assessment of patients with lumbar spinal stenosis. *Spine (Phila Pa 1976)*  
25 2002;27(1):84-91.
- 26  
27  
28  
29  
30  
31  
32  
33  
34  
35  
36  
37  
38  
39  
40  
41  
42  
43  
44  
45  
46  
47  
48  
49  
50  
51  
52  
53  
54  
55  
56  
57  
58  
59  
60

**Figure 1: Study flow chart****Table 1: Eligibility criteria****Inclusion criteria**

1. Registered with a primary care practice
2. 65 years and over
3. Participant is willing and able to give informed consent for participation in the RCT
4. Reports symptoms consistent with neurogenic claudication

**Exclusion criteria**

1. Living in a residential care or nursing home
2. Has a terminal condition with a life expectancy of less than 6 months
3. Any substantial health or social concern that, in the opinion of the patient's general practitioner, would place the patient at increased risk or inability to participate including known inability to provide informed consent e.g. Dementia.
4. Unable to walk three metres (width of a small room) without the help of another person
5. On a surgical waiting list
6. Presents with cauda equina syndrome or signs of serious pathology requiring immediate referral for investigations
7. Cognitive impairment (defined as an Abbreviated Mental Test score of 6 or less)
8. Registered blind
9. Unable to follow verbal instructions which would make participation in the experimental treatment arm of the trial impractical, for reasons including severe hearing impairment not corrected by a hearing aid or inability to follow simple safety instructions (e.g. English comprehension)

Table 2 – Screening questions from the OPAL Cohort Study Questionnaire<sup>3</sup>

| Questions                                                                                                                                                                                                                                                                                                                                                                 | Response required to be eligible for BOOST Trial |
|---------------------------------------------------------------------------------------------------------------------------------------------------------------------------------------------------------------------------------------------------------------------------------------------------------------------------------------------------------------------------|--------------------------------------------------|
| 1. In the past 6 WEEKS, have you had back pain <b>and/or</b> pain or other symptoms such as tingling, numbness or heaviness that travelled from your back into your buttocks or legs?<br>[Note: If the answer to this question is no, then the participant will not complete the remaining questions].                                                                    | Yes                                              |
| 1. Does standing make the pain or symptoms in your buttocks or legs worse?<br>2. Does walking make the pain or symptoms in your buttocks or legs worse?<br>3. Does sitting down make the pain or symptoms in your buttocks or legs better?<br>4. Does bending forward (for example to push a shopping trolley) make the pain or symptoms in your buttocks or legs better? | Yes to at least one of these questions           |

**Table 3: Data collection and outcomes for the BOOST Trial**

| Method                              | Domains measured           | Measure                                                                                                                                                                                                                                                                                                                                                                                                                                                                    | Time points   |
|-------------------------------------|----------------------------|----------------------------------------------------------------------------------------------------------------------------------------------------------------------------------------------------------------------------------------------------------------------------------------------------------------------------------------------------------------------------------------------------------------------------------------------------------------------------|---------------|
| Participant completed questionnaire | Demographic information    | Age and sex<br>Current alcohol and smoking behaviour <sup>78</sup><br>Ethnicity<br>Relationship status<br>Postcode<br>Type of housing<br>Current occupation<br>Education<br>Unpaid/paid carer [Question: Do you have an unpaid carer? (Someone who is not paid to care for you and without whose support you cannot cope. This could be a partner, family member or friend) Yes/No. Paid carer question is the same format.]<br>Household income                           | 0 months      |
|                                     | Back pain and leg symptoms | <b>Oswestry Disability Index (V2.1a)<sup>28</sup> – Primary Outcome</b><br>Troublesomeness of back and leg problems <sup>79</sup><br>Perceived ability to self-manage their condition [Question: We would like you to think about how you are managing your symptoms and your ability to walk and be mobile. How well do you feel that you are managing your back and leg problems TODAY? (Visual Analogue Scale (VAS) 0=Not managing at all; 10=Managing extremely well)] | 0,6,12 months |
|                                     | Quality of life            | EQ-5D-5L <sup>30</sup>                                                                                                                                                                                                                                                                                                                                                                                                                                                     | 0,6,12 months |
|                                     | Other pain                 | Nordic pain questionnaire <sup>18 19</sup>                                                                                                                                                                                                                                                                                                                                                                                                                                 | 0 months      |
|                                     | Comorbidity                | Self-report of current health conditions                                                                                                                                                                                                                                                                                                                                                                                                                                   | 0 months      |
|                                     | Frailty                    | Tilburg Frailty Index <sup>37</sup>                                                                                                                                                                                                                                                                                                                                                                                                                                        | 0,6,12 months |
|                                     | Physical activity          | 2 items from Rapid Assessment Disuse Index <sup>80</sup> [1. Time spent moving around on your feet; 2. Time spent sitting]                                                                                                                                                                                                                                                                                                                                                 | 0,6,12 months |
|                                     | Mobility                   | Change in mobility in the last year [Question: Compared to one year ago, how would you rate your walking in general? Much better now than one year ago; Somewhat better than one year ago; About the same; Somewhat worse than one year ago; Much worse now than one year ago]<br>Self-rated walking speed <sup>20</sup>                                                                                                                                                   | 0 months      |
|                                     |                            | Use of walking aids inside and outside [Question: Do you use a walking aid (e.g. walking stick, walker) to walk around outside/inside? Yes; no; sometimes]<br>Change in mobility in the last 6 months [Question: Compared to 6 months ago, how would you rate your walking in general? Much better now than 6 months ago; Somewhat better than 6 months ago; About the same; Somewhat worse than 6 months ago; Much worse now than 6 months ago]                           | 6,12 months   |

|                                   |                            |                                                                                                                                                                                                                                                                                                                                                                                                                                                                                                                                                                                                                                                                                                                         |                                              |
|-----------------------------------|----------------------------|-------------------------------------------------------------------------------------------------------------------------------------------------------------------------------------------------------------------------------------------------------------------------------------------------------------------------------------------------------------------------------------------------------------------------------------------------------------------------------------------------------------------------------------------------------------------------------------------------------------------------------------------------------------------------------------------------------------------------|----------------------------------------------|
|                                   | Balance and falls          | Prevention of Falls Network Europe (ProFANE) self-report of falls and fall related injuries <sup>38</sup>                                                                                                                                                                                                                                                                                                                                                                                                                                                                                                                                                                                                               | 0,6,12 months                                |
|                                   | Self-efficacy              | Single item from the Modified Gait Self-Efficacy Scale (10-item) <sup>32</sup> [Question: How much confidence do you have that you would be able to safely walk a long distance such as 1/2 mile? (VAS 0=no confidence; 10=complete confidence)]<br>Exercise self-efficacy scale (short version) <sup>22</sup><br>Self-efficacy recovery and maintenance related to performing home exercises <sup>33 34</sup>                                                                                                                                                                                                                                                                                                          | 0,6,12 months<br><br>0 months<br>6,12 months |
|                                   | Exercise adherence         | Intention to carry out home exercises <sup>81</sup> [Question: As part of the BOOST Trial, the physiotherapist will ask you to exercise at home at least twice a week for up to 20 minutes. How much do you agree with this statement? I intend to do these exercises at least twice a week for up to 20 minutes. Strongly Disagree; Disagree; Somewhat disagree; Neither agree nor disagree; Somewhat agree; Agree; Strongly agree]<br>Self-report of adherence to home exercise programme [Question: In the past 6 months, on average, how many times per week have you managed to do your exercises for at least 20 minutes? Never; 1 day per week; 2 days per week; 3-4 days per week; 5-6 days per week; Everyday] | 0 months<br><br>6,12 months                  |
|                                   | Habit (automaticity)       | Index of habit (short version) <sup>35</sup>                                                                                                                                                                                                                                                                                                                                                                                                                                                                                                                                                                                                                                                                            | 6,12 months                                  |
|                                   | Fear avoidance             | Fear avoidance beliefs questionnaire <sup>31</sup>                                                                                                                                                                                                                                                                                                                                                                                                                                                                                                                                                                                                                                                                      | 0,6,12 months                                |
|                                   | Beliefs about ageing       | Attitude to ageing questionnaire – physical changes subscale <sup>23</sup>                                                                                                                                                                                                                                                                                                                                                                                                                                                                                                                                                                                                                                              | 0 months                                     |
|                                   | Global rating of change    | Change in back and leg problems <sup>29</sup>                                                                                                                                                                                                                                                                                                                                                                                                                                                                                                                                                                                                                                                                           | 6,12 months                                  |
|                                   | Satisfaction               | Satisfaction with the exercises, changes in back & leg problems, increases in physical activity [All questions follow this format: How satisfied are you with the exercises that you were given to help with your back and leg problems? (VAS 0-4; 0=very dissatisfied; 4=very satisfied)]                                                                                                                                                                                                                                                                                                                                                                                                                              | 6,12 months                                  |
| Clinical interview and assessment | Height                     | Measured using a stadiometer                                                                                                                                                                                                                                                                                                                                                                                                                                                                                                                                                                                                                                                                                            | 0 months                                     |
|                                   | Weight                     | Measured using digital scales                                                                                                                                                                                                                                                                                                                                                                                                                                                                                                                                                                                                                                                                                           | 0 months                                     |
|                                   | Spinal parameters          | Sagittal alignment of the spine measured using C7 to wall measure <sup>40 41</sup>                                                                                                                                                                                                                                                                                                                                                                                                                                                                                                                                                                                                                                      | 0,6,12 months                                |
|                                   | Frailty                    | Hand Grip Strength <sup>44</sup> measured using a Jamar Plus+ dynamometer                                                                                                                                                                                                                                                                                                                                                                                                                                                                                                                                                                                                                                               | 0,6,12 months                                |
|                                   | Mobility                   | 6 minute walk test <sup>43</sup>                                                                                                                                                                                                                                                                                                                                                                                                                                                                                                                                                                                                                                                                                        | 0,6,12 months                                |
|                                   | Mobility/balance           | Short Physical Performance Battery <sup>82</sup>                                                                                                                                                                                                                                                                                                                                                                                                                                                                                                                                                                                                                                                                        | 0,6,12 months                                |
|                                   | Back pain and leg symptoms | STarT Back Screening Questionnaire <sup>21</sup><br>Swiss Spinal Stenosis Scale (Symptom subscale) <sup>27 83</sup>                                                                                                                                                                                                                                                                                                                                                                                                                                                                                                                                                                                                     | 0 months<br>0,6,12 months                    |
|                                   | Medication use             | Self-report of medication use                                                                                                                                                                                                                                                                                                                                                                                                                                                                                                                                                                                                                                                                                           | 0,6,12 months                                |
|                                   | Health resource use        | Client Service Receipt Inventory <sup>39</sup>                                                                                                                                                                                                                                                                                                                                                                                                                                                                                                                                                                                                                                                                          | 6,12 months                                  |
| Imaging                           | Spinal parameters          | MRI Scan - use existing scan taken in the last 12 months or referred for scan after randomisation                                                                                                                                                                                                                                                                                                                                                                                                                                                                                                                                                                                                                       | Variable                                     |

1  
2  
3  
4  
5  
6  
7  
8  
9  
10  
11  
12  
13  
14  
15  
16  
17  
18  
19  
20  
21  
22  
23  
24  
25  
26  
27  
28  
29  
30  
31  
32  
33  
34  
35  
36  
37  
38  
39  
40  
41  
42  
43  
44  
45  
46  
47  
48  
49  
50  
51  
52  
53  
54  
55  
56  
57  
58  
59  
60

**Table 4: Imaging parameters**

| <b>Sequ</b> | <b>FOV</b> | <b>Slice</b> | <b>Gap</b> | <b>TR</b> | <b>TE</b> | <b>ETL</b> | <b>Phase</b> | <b>Freq</b> | <b>Nex</b> |
|-------------|------------|--------------|------------|-----------|-----------|------------|--------------|-------------|------------|
| T2 sag      | 370        | 13/4         | 1          | 4061      | 102       | 23         | 320          | 512         | 3          |
| T1 Sag      | 370        | 13/4         | 1          | 446       | 11        | 23         | 224          | 416         | 3          |
| T2 axial    | 200        | 30/4         | 1          | 4955      | 111       | 25         | 224          | 320         | 3          |

For peer review only





Figure 1: Study flow chart

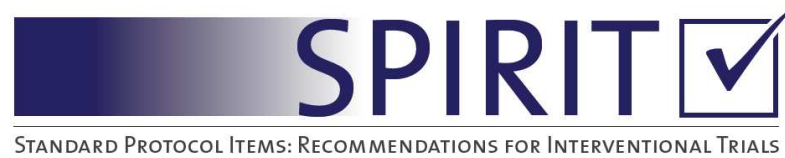

SPIRIT 2013 Checklist: Recommended items to address in a clinical trial protocol and related documents\*

| Section/item                      | Item No | Description                                                                                                                                                                                                                                                                              | Addressed on page number |
|-----------------------------------|---------|------------------------------------------------------------------------------------------------------------------------------------------------------------------------------------------------------------------------------------------------------------------------------------------|--------------------------|
| <b>Administrative information</b> |         |                                                                                                                                                                                                                                                                                          |                          |
| Title                             | 1       | Descriptive title identifying the study design, population, interventions, and, if applicable, trial acronym                                                                                                                                                                             | 1                        |
| Trial registration                | 2a      | Trial identifier and registry name. If not yet registered, name of intended registry                                                                                                                                                                                                     | 3                        |
|                                   | 2b      | All items from the World Health Organization Trial Registration Data Set                                                                                                                                                                                                                 | See ISRCTN website       |
| Protocol version                  | 3       | Date and version identifier                                                                                                                                                                                                                                                              | N/A                      |
| Funding                           | 4       | Sources and types of financial, material, and other support                                                                                                                                                                                                                              | 19-20                    |
| Roles and responsibilities        | 5a      | Names, affiliations, and roles of protocol contributors                                                                                                                                                                                                                                  | 1 and 19                 |
|                                   | 5b      | Name and contact information for the trial sponsor                                                                                                                                                                                                                                       | 19                       |
|                                   | 5c      | Role of study sponsor and funders, if any, in study design; collection, management, analysis, and interpretation of data; writing of the report; and the decision to submit the report for publication, including whether they will have ultimate authority over any of these activities | 20                       |
|                                   | 5d      | Composition, roles, and responsibilities of the coordinating centre, steering committee, endpoint adjudication committee, data management team, and other individuals or groups overseeing the trial, if applicable (see Item 21a for data monitoring committee)                         | 18-19                    |

## Introduction

|                          |    |                                                                                                                                                                                                           |            |
|--------------------------|----|-----------------------------------------------------------------------------------------------------------------------------------------------------------------------------------------------------------|------------|
| Background and rationale | 6a | Description of research question and justification for undertaking the trial, including summary of relevant studies (published and unpublished) examining benefits and harms for each intervention        | 4          |
|                          | 6b | Explanation for choice of comparators                                                                                                                                                                     | 4-5, 12-14 |
| Objectives               | 7  | Specific objectives or hypotheses                                                                                                                                                                         | 4          |
| Trial design             | 8  | Description of trial design including type of trial (eg, parallel group, crossover, factorial, single group), allocation ratio, and framework (eg, superiority, equivalence, noninferiority, exploratory) | 5          |

## Methods: Participants, interventions, and outcomes

|                      |     |                                                                                                                                                                                                |                                                                                   |
|----------------------|-----|------------------------------------------------------------------------------------------------------------------------------------------------------------------------------------------------|-----------------------------------------------------------------------------------|
| Study setting        | 9   | Description of study settings (eg, community clinic, academic hospital) and list of countries where data will be collected. Reference to where list of study sites can be obtained             | 5                                                                                 |
| Eligibility criteria | 10  | Inclusion and exclusion criteria for participants. If applicable, eligibility criteria for study centres and individuals who will perform the interventions (eg, surgeons, psychotherapists)   | 5-6                                                                               |
| Interventions        | 11a | Interventions for each group with sufficient detail to allow replication, including how and when they will be administered                                                                     | 12-14<br>A separate paper describing the intervention in detail will be published |
|                      | 11b | Criteria for discontinuing or modifying allocated interventions for a given trial participant (eg, drug dose change in response to harms, participant request, or improving/worsening disease) | 12-14                                                                             |
|                      | 11c | Strategies to improve adherence to intervention protocols, and any procedures for monitoring adherence (eg, drug tablet return, laboratory tests)                                              | 12-14                                                                             |
|                      | 11d | Relevant concomitant care and interventions that are permitted or prohibited during the trial                                                                                                  | 14                                                                                |

1  
2  
3  
4  
5  
6  
7  
8  
9  
10  
11  
12  
13  
14  
15  
16  
17  
18  
19  
20  
21  
22  
23  
24  
25  
26  
27  
28  
29  
30  
31  
32  
33  
34  
35  
36  
37  
38  
39  
40  
41  
42  
43  
44  
45  
46  
47

|                      |    |                                                                                                                                                                                                                                                                                                                                                                                |                          |
|----------------------|----|--------------------------------------------------------------------------------------------------------------------------------------------------------------------------------------------------------------------------------------------------------------------------------------------------------------------------------------------------------------------------------|--------------------------|
| Outcomes             | 12 | Primary, secondary, and other outcomes, including the specific measurement variable (eg, systolic blood pressure), analysis metric (eg, change from baseline, final value, time to event), method of aggregation (eg, median, proportion), and time point for each outcome. Explanation of the clinical relevance of chosen efficacy and harm outcomes is strongly recommended | 7-12<br>Table 3, Table 4 |
| Participant timeline | 13 | Time schedule of enrolment, interventions (including any run-ins and washouts), assessments, and visits for participants. A schematic diagram is highly recommended (see Figure)                                                                                                                                                                                               | Figure 1                 |
| Sample size          | 14 | Estimated number of participants needed to achieve study objectives and how it was determined, including clinical and statistical assumptions supporting any sample size calculations                                                                                                                                                                                          | 14-15                    |
| Recruitment          | 15 | Strategies for achieving adequate participant enrolment to reach target sample size                                                                                                                                                                                                                                                                                            | 6                        |

**Methods: Assignment of interventions (for controlled trials)**

Allocation:

|                                  |     |                                                                                                                                                                                                                                                                                                                                                          |   |
|----------------------------------|-----|----------------------------------------------------------------------------------------------------------------------------------------------------------------------------------------------------------------------------------------------------------------------------------------------------------------------------------------------------------|---|
| Sequence generation              | 16a | Method of generating the allocation sequence (eg, computer-generated random numbers), and list of any factors for stratification. To reduce predictability of a random sequence, details of any planned restriction (eg, blocking) should be provided in a separate document that is unavailable to those who enrol participants or assign interventions | 9 |
| Allocation concealment mechanism | 16b | Mechanism of implementing the allocation sequence (eg, central telephone; sequentially numbered, opaque, sealed envelopes), describing any steps to conceal the sequence until interventions are assigned                                                                                                                                                | 9 |
| Implementation                   | 16c | Who will generate the allocation sequence, who will enrol participants, and who will assign participants to interventions                                                                                                                                                                                                                                | 9 |
| Blinding (masking)               | 17a | Who will be blinded after assignment to interventions (eg, trial participants, care providers, outcome assessors, data analysts), and how                                                                                                                                                                                                                | 9 |
|                                  | 17b | If blinded, circumstances under which unblinding is permissible, and procedure for revealing a participant's allocated intervention during the trial                                                                                                                                                                                                     | 9 |

## Methods: Data collection, management, and analysis

|    |                     |     |                                                                                                                                                                                                                                                                                                                                                                                                              |                          |
|----|---------------------|-----|--------------------------------------------------------------------------------------------------------------------------------------------------------------------------------------------------------------------------------------------------------------------------------------------------------------------------------------------------------------------------------------------------------------|--------------------------|
| 1  |                     |     |                                                                                                                                                                                                                                                                                                                                                                                                              |                          |
| 2  |                     |     |                                                                                                                                                                                                                                                                                                                                                                                                              |                          |
| 3  |                     |     |                                                                                                                                                                                                                                                                                                                                                                                                              |                          |
| 4  |                     |     |                                                                                                                                                                                                                                                                                                                                                                                                              |                          |
| 5  |                     |     |                                                                                                                                                                                                                                                                                                                                                                                                              |                          |
| 6  |                     |     |                                                                                                                                                                                                                                                                                                                                                                                                              |                          |
| 7  | Data collection     | 18a | Plans for assessment and collection of outcome, baseline, and other trial data, including any related processes to promote data quality (eg, duplicate measurements, training of assessors) and a description of study instruments (eg, questionnaires, laboratory tests) along with their reliability and validity, if known. Reference to where data collection forms can be found, if not in the protocol | 7-12<br>Table 3, Table 4 |
| 8  | methods             |     |                                                                                                                                                                                                                                                                                                                                                                                                              |                          |
| 9  |                     |     |                                                                                                                                                                                                                                                                                                                                                                                                              |                          |
| 10 |                     |     |                                                                                                                                                                                                                                                                                                                                                                                                              |                          |
| 11 |                     |     |                                                                                                                                                                                                                                                                                                                                                                                                              |                          |
| 12 |                     | 18b | Plans to promote participant retention and complete follow-up, including list of any outcome data to be collected for participants who discontinue or deviate from intervention protocols                                                                                                                                                                                                                    | 11-12                    |
| 13 |                     |     |                                                                                                                                                                                                                                                                                                                                                                                                              |                          |
| 14 |                     |     |                                                                                                                                                                                                                                                                                                                                                                                                              |                          |
| 15 | Data management     | 19  | Plans for data entry, coding, security, and storage, including any related processes to promote data quality (eg, double data entry; range checks for data values). Reference to where details of data management procedures can be found, if not in the protocol                                                                                                                                            | 18                       |
| 16 |                     |     |                                                                                                                                                                                                                                                                                                                                                                                                              |                          |
| 17 |                     |     |                                                                                                                                                                                                                                                                                                                                                                                                              |                          |
| 18 |                     |     |                                                                                                                                                                                                                                                                                                                                                                                                              |                          |
| 19 | Statistical methods | 20a | Statistical methods for analysing primary and secondary outcomes. Reference to where other details of the statistical analysis plan can be found, if not in the protocol                                                                                                                                                                                                                                     | 15-17                    |
| 20 |                     |     |                                                                                                                                                                                                                                                                                                                                                                                                              |                          |
| 21 |                     |     |                                                                                                                                                                                                                                                                                                                                                                                                              |                          |
| 22 |                     | 20b | Methods for any additional analyses (eg, subgroup and adjusted analyses)                                                                                                                                                                                                                                                                                                                                     | 15-17                    |
| 23 |                     |     |                                                                                                                                                                                                                                                                                                                                                                                                              |                          |
| 24 |                     | 20c | Definition of analysis population relating to protocol non-adherence (eg, as randomised analysis), and any statistical methods to handle missing data (eg, multiple imputation)                                                                                                                                                                                                                              | 15-17                    |
| 25 |                     |     |                                                                                                                                                                                                                                                                                                                                                                                                              |                          |
| 26 |                     |     |                                                                                                                                                                                                                                                                                                                                                                                                              |                          |
| 27 |                     |     |                                                                                                                                                                                                                                                                                                                                                                                                              |                          |
| 28 |                     |     |                                                                                                                                                                                                                                                                                                                                                                                                              |                          |
| 29 |                     |     |                                                                                                                                                                                                                                                                                                                                                                                                              |                          |
| 30 |                     |     |                                                                                                                                                                                                                                                                                                                                                                                                              |                          |
| 31 | Data monitoring     | 21a | Composition of data monitoring committee (DMC); summary of its role and reporting structure; statement of whether it is independent from the sponsor and competing interests; and reference to where further details about its charter can be found, if not in the protocol. Alternatively, an explanation of why a DMC is not needed                                                                        | 18-19                    |
| 32 |                     |     |                                                                                                                                                                                                                                                                                                                                                                                                              |                          |
| 33 |                     |     |                                                                                                                                                                                                                                                                                                                                                                                                              |                          |
| 34 |                     |     |                                                                                                                                                                                                                                                                                                                                                                                                              |                          |
| 35 |                     | 21b | Description of any interim analyses and stopping guidelines, including who will have access to these interim results and make the final decision to terminate the trial                                                                                                                                                                                                                                      | 18-19                    |
| 36 |                     |     |                                                                                                                                                                                                                                                                                                                                                                                                              |                          |
| 37 |                     |     |                                                                                                                                                                                                                                                                                                                                                                                                              |                          |
| 38 | Harms               | 22  | Plans for collecting, assessing, reporting, and managing solicited and spontaneously reported adverse events and other unintended effects of trial interventions or trial conduct                                                                                                                                                                                                                            | 12                       |
| 39 |                     |     |                                                                                                                                                                                                                                                                                                                                                                                                              |                          |
| 40 |                     |     |                                                                                                                                                                                                                                                                                                                                                                                                              |                          |
| 41 |                     |     |                                                                                                                                                                                                                                                                                                                                                                                                              |                          |
| 42 |                     |     |                                                                                                                                                                                                                                                                                                                                                                                                              |                          |
| 43 |                     |     |                                                                                                                                                                                                                                                                                                                                                                                                              |                          |
| 44 |                     |     |                                                                                                                                                                                                                                                                                                                                                                                                              |                          |
| 45 |                     |     |                                                                                                                                                                                                                                                                                                                                                                                                              |                          |
| 46 |                     |     |                                                                                                                                                                                                                                                                                                                                                                                                              |                          |
| 47 |                     |     |                                                                                                                                                                                                                                                                                                                                                                                                              |                          |

|    |                                 |     |                                                                                                                                                                                                                                                                                     |             |
|----|---------------------------------|-----|-------------------------------------------------------------------------------------------------------------------------------------------------------------------------------------------------------------------------------------------------------------------------------------|-------------|
| 1  |                                 |     |                                                                                                                                                                                                                                                                                     |             |
| 2  |                                 |     |                                                                                                                                                                                                                                                                                     |             |
| 3  | Auditing                        | 23  | Frequency and procedures for auditing trial conduct, if any, and whether the process will be independent from investigators and the sponsor                                                                                                                                         | 12,14,18-19 |
| 4  |                                 |     |                                                                                                                                                                                                                                                                                     |             |
| 5  |                                 |     |                                                                                                                                                                                                                                                                                     |             |
| 6  | <b>Ethics and dissemination</b> |     |                                                                                                                                                                                                                                                                                     |             |
| 7  |                                 |     |                                                                                                                                                                                                                                                                                     |             |
| 8  | Research ethics approval        | 24  | Plans for seeking research ethics committee/institutional review board (REC/IRB) approval                                                                                                                                                                                           | 18          |
| 9  |                                 |     |                                                                                                                                                                                                                                                                                     |             |
| 10 |                                 |     |                                                                                                                                                                                                                                                                                     |             |
| 11 | Protocol amendments             | 25  | Plans for communicating important protocol modifications (eg, changes to eligibility criteria, outcomes, analyses) to relevant parties (eg, investigators, REC/IRBs, trial participants, trial registries, journals, regulators)                                                    | 18          |
| 12 |                                 |     |                                                                                                                                                                                                                                                                                     |             |
| 13 |                                 |     |                                                                                                                                                                                                                                                                                     |             |
| 14 |                                 |     |                                                                                                                                                                                                                                                                                     |             |
| 15 | Consent or assent               | 26a | Who will obtain informed consent or assent from potential trial participants or authorised surrogates, and how (see Item 32)                                                                                                                                                        | 7, 17       |
| 16 |                                 |     |                                                                                                                                                                                                                                                                                     |             |
| 17 |                                 |     |                                                                                                                                                                                                                                                                                     |             |
| 18 |                                 | 26b | Additional consent provisions for collection and use of participant data and biological specimens in ancillary studies, if applicable                                                                                                                                               | N/A         |
| 19 |                                 |     |                                                                                                                                                                                                                                                                                     |             |
| 20 |                                 |     |                                                                                                                                                                                                                                                                                     |             |
| 21 | Confidentiality                 | 27  | How personal information about potential and enrolled participants will be collected, shared, and maintained in order to protect confidentiality before, during, and after the trial                                                                                                | 18          |
| 22 |                                 |     |                                                                                                                                                                                                                                                                                     |             |
| 23 |                                 |     |                                                                                                                                                                                                                                                                                     |             |
| 24 | Declaration of interests        | 28  | Financial and other competing interests for principal investigators for the overall trial and each study site                                                                                                                                                                       | 20          |
| 25 |                                 |     |                                                                                                                                                                                                                                                                                     |             |
| 26 |                                 |     |                                                                                                                                                                                                                                                                                     |             |
| 27 | Access to data                  | 29  | Statement of who will have access to the final trial dataset, and disclosure of contractual agreements that limit such access for investigators                                                                                                                                     | 20          |
| 28 |                                 |     |                                                                                                                                                                                                                                                                                     |             |
| 29 |                                 |     |                                                                                                                                                                                                                                                                                     |             |
| 30 | Ancillary and post-trial care   | 30  | Provisions, if any, for ancillary and post-trial care, and for compensation to those who suffer harm from trial participation                                                                                                                                                       | N/A         |
| 31 |                                 |     |                                                                                                                                                                                                                                                                                     |             |
| 32 |                                 |     |                                                                                                                                                                                                                                                                                     |             |
| 33 | Dissemination policy            | 31a | Plans for investigators and sponsor to communicate trial results to participants, healthcare professionals, the public, and other relevant groups (eg, via publication, reporting in results databases, or other data sharing arrangements), including any publication restrictions | 19          |
| 34 |                                 |     |                                                                                                                                                                                                                                                                                     |             |
| 35 |                                 |     |                                                                                                                                                                                                                                                                                     |             |
| 36 |                                 |     |                                                                                                                                                                                                                                                                                     |             |
| 37 |                                 | 31b | Authorship eligibility guidelines and any intended use of professional writers                                                                                                                                                                                                      | N/A         |
| 38 |                                 |     |                                                                                                                                                                                                                                                                                     |             |
| 39 |                                 | 31c | Plans, if any, for granting public access to the full protocol, participant-level dataset, and statistical code                                                                                                                                                                     | 20          |
| 40 |                                 |     |                                                                                                                                                                                                                                                                                     |             |
| 41 |                                 |     |                                                                                                                                                                                                                                                                                     |             |
| 42 |                                 |     |                                                                                                                                                                                                                                                                                     |             |
| 43 |                                 |     |                                                                                                                                                                                                                                                                                     |             |
| 44 |                                 |     |                                                                                                                                                                                                                                                                                     |             |
| 45 |                                 |     |                                                                                                                                                                                                                                                                                     |             |
| 46 |                                 |     |                                                                                                                                                                                                                                                                                     |             |
| 47 |                                 |     |                                                                                                                                                                                                                                                                                     |             |

**Appendices**

|                            |    |                                                                                                                                                                                                |                     |
|----------------------------|----|------------------------------------------------------------------------------------------------------------------------------------------------------------------------------------------------|---------------------|
| Informed consent materials | 32 | Model consent form and other related documentation given to participants and authorised surrogates                                                                                             | Approved by the REC |
| Biological specimens       | 33 | Plans for collection, laboratory evaluation, and storage of biological specimens for genetic or molecular analysis in the current trial and for future use in ancillary studies, if applicable | N/A                 |

\*It is strongly recommended that this checklist be read in conjunction with the SPIRIT 2013 Explanation & Elaboration for important clarification on the items. Amendments to the protocol should be tracked and dated. The SPIRIT checklist is copyrighted by the SPIRIT Group under the Creative Commons "[Attribution-NonCommercial-NoDerivs 3.0 Unported](#)" license.

Peer review only



# BMJ Open

## Better Outcomes for Older people with Spinal Trouble [BOOST] Trial: A randomised controlled trial of a combined physical and psychological intervention for older adults with neurogenic claudication (protocol)

|                               |                                                                                                                                                                                                                                                                                                                                                                                                                                                                                                                                                                                                                                                                                                                                                                                                                                                                                                                                                                                                                                                                                                                                                                                                                                                                                                                                                                                                                                                                                                                                                                                                                                                                                                                                                                                                                                                                                                                                                                                                                                                                                                                                                                                                                                                                                                                                                                                                                              |
|-------------------------------|------------------------------------------------------------------------------------------------------------------------------------------------------------------------------------------------------------------------------------------------------------------------------------------------------------------------------------------------------------------------------------------------------------------------------------------------------------------------------------------------------------------------------------------------------------------------------------------------------------------------------------------------------------------------------------------------------------------------------------------------------------------------------------------------------------------------------------------------------------------------------------------------------------------------------------------------------------------------------------------------------------------------------------------------------------------------------------------------------------------------------------------------------------------------------------------------------------------------------------------------------------------------------------------------------------------------------------------------------------------------------------------------------------------------------------------------------------------------------------------------------------------------------------------------------------------------------------------------------------------------------------------------------------------------------------------------------------------------------------------------------------------------------------------------------------------------------------------------------------------------------------------------------------------------------------------------------------------------------------------------------------------------------------------------------------------------------------------------------------------------------------------------------------------------------------------------------------------------------------------------------------------------------------------------------------------------------------------------------------------------------------------------------------------------------|
| Journal:                      | <i>BMJ Open</i>                                                                                                                                                                                                                                                                                                                                                                                                                                                                                                                                                                                                                                                                                                                                                                                                                                                                                                                                                                                                                                                                                                                                                                                                                                                                                                                                                                                                                                                                                                                                                                                                                                                                                                                                                                                                                                                                                                                                                                                                                                                                                                                                                                                                                                                                                                                                                                                                              |
| Manuscript ID                 | bmjopen-2018-022205.R2                                                                                                                                                                                                                                                                                                                                                                                                                                                                                                                                                                                                                                                                                                                                                                                                                                                                                                                                                                                                                                                                                                                                                                                                                                                                                                                                                                                                                                                                                                                                                                                                                                                                                                                                                                                                                                                                                                                                                                                                                                                                                                                                                                                                                                                                                                                                                                                                       |
| Article Type:                 | Protocol                                                                                                                                                                                                                                                                                                                                                                                                                                                                                                                                                                                                                                                                                                                                                                                                                                                                                                                                                                                                                                                                                                                                                                                                                                                                                                                                                                                                                                                                                                                                                                                                                                                                                                                                                                                                                                                                                                                                                                                                                                                                                                                                                                                                                                                                                                                                                                                                                     |
| Date Submitted by the Author: | 21-Aug-2018                                                                                                                                                                                                                                                                                                                                                                                                                                                                                                                                                                                                                                                                                                                                                                                                                                                                                                                                                                                                                                                                                                                                                                                                                                                                                                                                                                                                                                                                                                                                                                                                                                                                                                                                                                                                                                                                                                                                                                                                                                                                                                                                                                                                                                                                                                                                                                                                                  |
| Complete List of Authors:     | <p>Williamson, Esther; University of Oxford Nuffield Department of Orthopaedics Rheumatology and Musculoskeletal Sciences, Centre for Rehabilitation Research</p> <p>Ward, Lesley; University of Oxford Nuffield Department of Orthopaedics Rheumatology and Musculoskeletal Sciences, Centre for Rehabilitation Research</p> <p>Vadher , Karan; University of Oxford, Centre for Statistics in Medicine</p> <p>Dutton, Susan; University of Oxford, Centre for Statistics in Medicine</p> <p>Parker, Ben; University of Warwick, Warwick Medical School</p> <p>Petrou, Stavros; University of Warwick, Warwick Medical School</p> <p>Hutchinson, Charles; University of Warwick, Warwick Medical School</p> <p>Gagen , Richard; University of Warwick, Warwick Medical School</p> <p>Arden, Nigel; University of Oxford Nuffield Department of Orthopaedics Rheumatology and Musculoskeletal Sciences</p> <p>Barker, Karen; Nuffield Orthopaedic Centre, Oxford University Hospitals NHS Trust,</p> <p>Boniface, Graham; University of Oxford Nuffield Department of Orthopaedics Rheumatology and Musculoskeletal Sciences, Centre for Rehabilitation Research</p> <p>Bruce, Julie; University of Warwick, Warwick Clinical Trials Unit</p> <p>Collins, Gary; University of Oxford, Centre for Statistics in Medicine</p> <p>fairbank, jeremy; University of Oxford Nuffield Department of Orthopaedics Rheumatology and Musculoskeletal Sciences</p> <p>Fitch , Judith ; Patient and Public Involvement Representative</p> <p>French, David; University of Manchester, School of Psychological Sciences</p> <p>Garrett, Angela; University of Oxford Nuffield Department of Orthopaedics Rheumatology and Musculoskeletal Sciences, Centre for Rehabilitation Research</p> <p>Ghandi, Varsha; University of Oxford Nuffield Department of Orthopaedics Rheumatology and Musculoskeletal Sciences, Centre for Rehabilitation Research</p> <p>Griffiths, Frances; University of Warwick, Warwick Medical School</p> <p>Hansen, Zara; University of Oxford Nuffield Department of Orthopaedics Rheumatology and Musculoskeletal Sciences, Centre for Rehabilitation Research</p> <p>Mallen, Christian; Keele University, Arthritis Research UK Primary Care Centre</p> <p>Morris , Alana ; University of Oxford Nuffield Department of Orthopaedics Rheumatology and Musculoskeletal Sciences, Centre for Rehabilitation</p> |

|                                      |                                                                                                                                                                       |
|--------------------------------------|-----------------------------------------------------------------------------------------------------------------------------------------------------------------------|
|                                      | Research<br>Lamb, Sarah; University of Oxford Nuffield Department of Orthopaedics<br>Rheumatology and Musculoskeletal Sciences, Centre for Rehabilitation<br>Research |
| <b>Primary Subject<br/>Heading</b> : | Rehabilitation medicine                                                                                                                                               |
| <b>Secondary Subject Heading</b> :   | Evidence based practice, Health economics, Health services research,<br>Qualitative research                                                                          |
| <b>Keywords</b> :                    | Neurogenic Claudication, Spinal Stenosis, Exercise, Cognitive Behavioural<br>Techniques, Physiotherapy, Randomised controlled trial                                   |
|                                      |                                                                                                                                                                       |

SCHOLARONE™  
Manuscripts

1  
2  
3  
4  
5 **Better Outcomes for Older people with Spinal Trouble [BOOST] Trial:**  
6 **A randomised controlled trial of a combined physical and**  
7 **psychological intervention for older adults with neurogenic**  
8 **claudication (protocol)**  
9  
10

11  
12 **Authors:**  
13

14 Esther Williamson<sup>1</sup>, Lesley Ward<sup>1</sup>, Karan Vadher<sup>2</sup>, Susan J Dutton<sup>2</sup>, Ben Parker<sup>3</sup>, Stavros Petrou<sup>3</sup>,  
15 Charles Hutchinson<sup>3</sup>, Richard Gagen<sup>3</sup>, Nigel Arden<sup>1</sup>, Karen Barker<sup>4</sup>, Graham Boniface<sup>1</sup>, Julie Bruce<sup>3</sup>,  
16 Gary Collins<sup>2</sup>, Jeremy Fairbank<sup>1</sup>, Judith Fitch<sup>5</sup>, David P French<sup>6</sup>, Angela Garrett<sup>1</sup>, Varsha Ghandi<sup>1</sup>,  
17 Frances Griffiths<sup>3</sup>, Zara Hansen<sup>1</sup>, Christian Mallen<sup>7</sup>, Alana Morris<sup>1</sup> and Sarah E Lamb<sup>1</sup>  
18  
19  
20  
21

22 <sup>1</sup>Nuffield Department of Rheumatology, Orthopaedics and Musculoskeletal Sciences, University of  
23 Oxford, UK  
24

25 <sup>2</sup> Oxford Clinical Trials Research Unit, Centre for Statistics in Medicine, Nuffield Department of  
26 Orthopaedics, Rheumatology and Musculoskeletal Sciences, University of Oxford, UK  
27

28 <sup>3</sup> Warwick Medical School, University of Warwick, UK  
29

30 <sup>4</sup> Oxford University Hospitals NHS Trust, Oxford, UK  
31

32 <sup>5</sup> Patient and Public Involvement Representative  
33

34 <sup>6</sup> Manchester Centre for Health Psychology, School of Health Sciences, University of Manchester, UK  
35

36 <sup>7</sup> Arthritis Research UK Primary Care Centre, Institute for Primary Care and Health Sciences, Keele  
37 University, Keele, UK  
38  
39

40 **Correspondence to:** Dr Esther Williamson, Centre for Rehabilitation Research, Nuffield Department  
41 of Orthopaedics, Rheumatology and Musculoskeletal Sciences, University of Oxford, Botnar Research  
42 Building, Windmill Road, Oxford, OX3 7LD, UK. Tel: +44 1865 223120; Email:  
43 [esther.williamson@ndorms.ox.ac.uk](mailto:esther.williamson@ndorms.ox.ac.uk)  
44  
45  
46  
47  
48  
49  
50  
51  
52  
53  
54  
55  
56  
57  
58  
59  
60

## Strengths and limitations

- The BOOST Trial is a large multi-centred randomised controlled trial with a pre-specified sample size estimate and includes health economic and qualitative evaluations.
- The primary outcome is the Oswestry Disability Index but we also collect a range of secondary outcomes including objective physical capacity measures and self-reported pain, symptoms and mobility which are highly relevant to this patient group.
- The intervention is individually tailored and utilises group supervision to maximise the potential for cost-effectiveness.
- Due to the nature of the intervention, participants cannot be blinded to treatment allocation.
- At some sites, the same physiotherapist is delivering both trial interventions but treatments are delivered according to a manualised protocol and quality control visits are conducted to reduce the risk of introducing bias to the trial.

## Abstract:

Introduction: Neurogenic claudication due to spinal stenosis is common in older adults. The effectiveness of conservative interventions is not known. The study aim is to estimate the clinical and cost-effectiveness of a physiotherapist delivered, combined physical and psychological intervention.

Methods and analysis: This is a pragmatic, multi-centred, randomised controlled trial. Participants are randomised to a combined physical and psychological intervention (BOOST programme) or best practice advice (control). Community-dwelling adults, 65 years and over, with neurogenic claudication are identified from community and secondary care services. Recruitment is supplemented using a primary care based cohort. Participants are registered prospectively and randomised in a 2:1 ratio (intervention:control) using a web-based service to ensure allocation concealment. The target sample size is a minimum of 402.

The BOOST programme consists of an individual assessment and twelve 90 minute classes, including education and discussion underpinned by cognitive behavioural techniques, exercises and walking circuit. During and after the classes, participants undertake home exercises and there are 2 support telephone calls to promote adherence with the exercises. Best practice advice is delivered in 1-3 individual sessions with a physiotherapist.

The primary outcome is the Oswestry Disability Index at 12 months. Secondary outcomes include the 6 minute walk test, Short Performance Physical Battery, Fear Avoidance Beliefs Questionnaire and Gait Self-efficacy Scale. Outcomes are measured at 6 and 12 months by researchers who are masked to treatment allocation. The primary statistical analysis will be by 'intention to treat'. There is a parallel health economic evaluation and qualitative study.

Ethics and dissemination: Ethical approval was given on the 03 March 2016 (National Research Ethics Committee number: 16/LO/0349). This protocol adheres to the SPIRIT Checklist. Results will be reported at conferences and in peer-reviewed publications using the CONSORT guidelines. A plain English summary will be published on the BOOST website.

Trial registration: ISRCTN12698674

Keywords: Neurogenic claudication, spinal stenosis, exercise, randomised controlled trial

## Introduction

Neurogenic claudication (NC) is a condition that frequently affects older adults<sup>1</sup>. The burden of symptoms is substantial. NC presents as pain, discomfort or other symptoms radiating from the spine into the buttocks and legs, which is provoked by walking or prolonged standing and relieved by sitting or lumbar flexion<sup>2</sup>. Other signs and symptoms include weakness, altered sensation, fatigue and gait changes<sup>2</sup>. Pain in the lower back is usual but not a necessary diagnostic feature. The symptoms of NC are thought to arise from pressure on nerves and blood vessels in the spinal canal caused by degenerative changes narrowing the volume of the spinal canal. Narrowing may or may not be evident on radiological imaging<sup>2,3</sup>. When narrowing is evident radiologically, the condition is termed Lumbar Spinal Stenosis (LSS). The relationship between imaging results and symptoms is inconsistent as not all people with radiological narrowing report symptoms of NC<sup>2,3</sup>.

Symptoms due to spinal stenosis are the most common reason for spinal surgery in people over 65 years of age<sup>4</sup>. However, the effectiveness of surgery is unclear, and it exposes older people to considerable risk of complications, including wound infection and cardiorespiratory problems<sup>4-6</sup>. Surgery is also expensive. Current clinical guidelines suggest that physiotherapy is an option for patients with symptoms arising from lumbar spinal stenosis before proceeding to surgery<sup>7</sup>. However, we do not know whether physiotherapy is effective, nor which physiotherapy techniques should be used<sup>8</sup>. A Cochrane systematic literature review reports that the current evidence for non-operative care for people with NC is very low to low quality<sup>9</sup>. All recent reviews agree that higher quality trials are needed<sup>9-13</sup>. Despite NC being a condition associated with older age, interventions tested to date have not targeted age-associated changes in the musculoskeletal system of participants (such as generalised sarcopenia and frailty) or the psychological impact of pain. In order to generate high quality evidence regarding non-surgical care for NC, our aim is to conduct a high quality, multi-centred, randomised controlled trial of a physiotherapist delivered combined physical and psychological intervention.

## Objectives

To estimate the clinical and cost-effectiveness of a physiotherapist delivered combined physical and psychological intervention for older adults with neurogenic claudication compared to best practice advice.

To explore whether indicators of frailty, behavioural factors and radiological (MRI) biomarkers can identify groups of participants who are more likely to respond positively to the intervention using pre-specified sub-group analyses.

To conduct a parallel, longitudinal qualitative study with a sample of trial participants to better understand participant experiences of living and ageing with NC, and to inform implementation if the intervention is successful.

## Methods/Design

### Overview

The study design is a multi-centred randomised controlled trial (RCT) with embedded qualitative study and economic evaluation (See Figure 1).

We are currently recruiting community-dwelling older adults with symptoms of neurogenic claudication. Recruitment opened on the 25<sup>th</sup> of July, 2016 and we anticipate recruitment to be completed around June 2018. Participants are identified from NHS Physiotherapy and Consultant Spinal Clinics in community and secondary care settings. In addition, participants are identified through a primary care based cohort study (The Oxford Pain, Activity and Lifestyle Survey [OPAL] cohort study). The OPAL Cohort Study is being conducted in the same localities as the trial.

The experimental intervention is a physiotherapist delivered combined physical and psychological programme. Participants attend an individual session, followed by 12 group sessions delivered over a 12-week period. During the individual session, participants undergo an assessment and are prescribed the exercises they will carry out during the group sessions tailored to their ability, symptom presentation and general health. The group sessions consists of: 1) education and group discussion based on cognitive behavioural (CB) techniques; 2) warm up and circuit exercises; and 3) a walking circuit. The education component focuses on pain management strategies, engagement with home exercises and increasing physical activity. The exercises target muscle strength, balance, and flexibility whilst the walking circuit aims to increase walking self-efficacy and mobility. The education component and supervised exercise is provided in groups of approximately 6 participants to maximise the potential for cost-effectiveness. There are two follow up phone calls on completion of the group sessions, to encourage adherence with the home exercise programme.

The comparator is advice given by a physiotherapist (best practice advice), ideally in one session, but up to two further review sessions are permissible. Advice includes self-management strategies, home exercises and encouragement to increase physical activity.

Participants are randomised in a 2:1 ratio (intervention:control) and followed up for 12 months (primary endpoint).

### Eligibility

Participants are included in the trial if they fulfil the eligibility criteria listed in Table 1. In the United Kingdom, the majority of adults are registered with a primary care practice. Due to the pragmatic nature of this trial, we include people with symptoms consistent with the clinical presentation of NC rather than a diagnosis of spinal stenosis based on evidence of narrowing of the spinal canal on an MRI scan. NC presents as a cluster of symptoms easily recognised using simple self-report questions identified in a recent systematic literature review<sup>3</sup> (Table 2). These questions have excellent sensitivity and specificity for identifying NC<sup>3</sup> and are used to screen for eligible participants.

The exclusion criteria are largely related to the participant being unable to participate in the intervention, for example, if they are unable to follow instructions or mobilise short distances without assistance. Participants are not excluded on the basis of any existing co-morbidities unless their General Practitioner (GP) feels inclusion in the study places them at risk.



## Approach

Potential participants are approached via two routes:

- 1) Physiotherapy and consultant spinal clinics in community and secondary care NHS settings

Potential participants are identified by clinical staff in physiotherapy and consultant spinal clinics or from referrals. Staff are asked to identify potentially eligible patients based on age ( $\geq 65$  years) and symptoms (back and/or leg symptoms) and to screen out those on surgical waiting lists if that information is available. Clinical staff approach potentially eligible patients attending clinics, provide information about the study and ask if they are interested in being contacted by the research team. Clinical staff may also contact new referrals by telephone to inform them about the study. Potential participants who are interested and willing to be contacted by the research team are provided with a Participant Information Leaflet (PIL), and their contact details are passed to the BOOST researcher for full eligibility screening.

- 2) The OPAL Cohort Study

The OPAL Cohort study is a population based cohort study. Participants are identified from a random sample of patients aged over 65 years registered with each participating primary care practice. The OPAL cohort study is currently ongoing at 34 primary care practices, and will be described elsewhere.

Embedded within the cohort study postal questionnaires are self-report questions to identify individuals with possible NC (Table 2). During the process of consent for the cohort study, OPAL participants are asked for additional consent for the University of Oxford to provide information and an invitation to clinical trials relevant to their clinical profile. OPAL participants who fulfil the initial criteria for the BOOST Trial (Table 1) are invited to take part in eligibility screening for the trial and provided with the BOOST PIL. OPAL participants who accept the invitation for screening are then contacted by telephone for initial screening.

## Eligibility screening

Potential participants identified via NHS spinal clinics or the OPAL cohort study are telephoned by the BOOST researcher (physiotherapists or research nurses) working at each site. During this telephone call, the researcher provides further information about the trial and completes initial eligibility checks. Eligible patients are invited to attend a research clinic appointment for a full assessment. If an individual requests to undertake the initial eligibility check in person then this is arranged.

The research clinic appointment includes assessment of symptoms to ensure they are consistent with NC (using the questions in Table 2), and screening for cauda equina syndrome or signs of serious pathology requiring immediate referral for investigations. Potential participants also undertake the Abbreviated Mental Test (AMT)<sup>14</sup> to screen for cognitive impairment, which would make it difficult for a person to participate in the intervention. The AMT contains 10 items to assess orientation, registration, recall and concentration. This test can be used by any clinician and only takes 3-4 minutes to administer<sup>15</sup>. A score of 6 or below (out of 10) suggests cognitive impairment requiring further assessment and patients are advised to consult their GP<sup>15-17</sup>. A mobility assessment

1  
2  
3 is undertaken if required to ensure the participant is able to mobilise independently at least 3  
4 metres unassisted (with or without a walking aid).

### 6 **Informed consent**

7 On completion of the full eligibility assessment, eligible participants are asked to provide written  
8 informed consent prior to enrolling them into the trial. The consent is taken by a researcher who has  
9 completed training in the consent procedures for the BOOST Trial.

### 12 **Baseline assessment**

13 After providing consent, the participant then completes a baseline questionnaire and undergoes a  
14 clinical assessment by the researcher. Data collection is described in Table 3. There are a number of  
15 variables only collected at baseline for the purposes of providing descriptive data on the sample.  
16 The participant is weighed using digital scales wearing light, indoor clothing with their shoes  
17 removed. Weight is recorded to the nearest 0.1 kg. Height is measured using a stadiometer  
18 positioned against a wall. The participant stands on the platform, shoes removed, as upright as  
19 possible, hands by their side. The head plate of the stadiometer is lowered until it gently rests on the  
20 top of the participant's head and the height is recorded in metres from the measuring rod, to the  
21 nearest 0.001m (1mm).

22  
23  
24  
25 The participant provides self-reported data including the demographic variables listed in Table 3, co-  
26 morbidities including other pain problems (measured using the Nordic pain questionnaire<sup>18 19</sup>) and  
27 their current mobility status. Measures of mobility status include use of walking aids inside and  
28 outside, and self-rated walking speed<sup>20</sup>. Change in mobility in the last year is measured using a 5  
29 point scale constructed for the trial.

30  
31 The STarT Back Screening Questionnaire<sup>21</sup> is completed, allowing participants to be categorised  
32 according to their risk (low, medium or high) of developing persistent, disabling symptoms<sup>21</sup>. Self-  
33 reported psychological factors with a potential impact on outcome are also collected. These include  
34 their confidence to exercise (Exercise self-efficacy scale (short version)<sup>22</sup>) and their intention to carry  
35 out their home exercises using a question constructed for the trial (See Table 3). Participants'  
36 attitudes to the physical changes associated with ageing are measured using the Attitude to Ageing  
37 Questionnaire – physical changes subscale<sup>23</sup>.

38  
39  
40  
41 Variables collected at follow up are described in the section on outcome measures.

### 43 **Imaging**

44 Alongside the RCT, there is an exploration of whether MRI scan parameters along with other  
45 baseline factors moderate response to physiotherapy treatment. Indirect visualisation by Magnetic  
46 Resonance Imaging (MRI) is the gold standard for diagnosing lumbar spinal stenosis when a patient  
47 presents with NC, and is always undertaken before surgery, but not necessarily before conservative  
48 treatment. Increasingly, GPs have open access to MRI imaging, and if MRI were predictive of  
49 response to conservative treatment this could aid GPs clinical decision making. Despite the expense,  
50 there is remarkably little evidence about whether MRI scans can guide treatment choice effectively.  
51 Research evidence indicates that the fit between symptoms and MRI changes is poor<sup>24 25</sup>. As MRI is  
52 currently the most common imaging investigation used, MRI data will be collected for all participants  
53 and we will systematically quantify the imaging characteristics. Pre-existing scans, taken in the 12  
54 months preceding randomisation, will be used where possible to reduce the need for scanning.

1  
2  
3 Participants will be referred for an MRI study of the lumbar spine if they have not had one in the 12  
4 months prior to randomisation. For these participants, the MRI scan will be taken after completion  
5 of other baseline data collection, and where possible before randomisation. Due to the nature of  
6 spinal stenosis we would not expect spinal parameters to change markedly over a year long period,  
7 hence, the rationale for including existing scans. Practically, it is not possible to collect all MRI data  
8 pre-baseline data collection as this may delay treatment and create unacceptable waiting times. For  
9 the sub-set of people who have MRI scans prior to randomisation we will undertake formal sub-  
10 group analysis. We will explore other aspects of the relationship between functional outcomes and  
11 scan characteristics in additional analyses (not to be reported alongside the main trial results).  
12  
13

14 Consent for referral for a new MRI or use of an existing scan is obtained at the time of consent for  
15 the trial. Existing scans are transferred to a central repository for analysis in DICOM (Digital Imaging  
16 and Communications in Medicine) format.  
17  
18

19 The MRI data collection follows the protocol typical of NHS imaging departments. This is very similar  
20 across departments and efforts have been made to standardise the protocol where significant  
21 differences were identified.  
22

23 We anticipate that a small number of participants will not have an MRI scan due to contraindications  
24 or by personal choice. Lack of an MRI scan does not exclude participants from the trial.  
25

#### 26 Imaging protocol

27  
28 The MRI scan is performed supine, with the knees supported in flexion by a small foam wedge,  
29 resulting in relaxation of the normal lumbar lordosis. Imaging is performed using a dedicated spine  
30 phased array coil.  
31

32  
33 T1 and T2 weighted sagittal imaging is followed by T2 weighted axial imaging of at least the lower  
34 three discs. The axial imaging is either taken as three separate blocks, each angulated and entered  
35 on the discs, or as a single block extending from L3 to S1.  
36

37 Imaging parameters should be near those described in Table 4. The BOOST Trial radiologist liaises  
38 with site to ensure data scans are suitable for data collection.  
39

40 MRI scans are assessed by a single observer blinded to treatment allocation. Measurement of bony  
41 canal and dural sac cross sectional area at each vertebral level allow assessment of central canal  
42 stenosis. The size of the lateral recess and neural exit foramen is measured and recorded  
43 quantitatively. The exact degree of narrowing to confirm stenosis is not well defined. In a review by  
44 Steurer et al<sup>26</sup>, a dural sac cross-sectional area of less than 100mm<sup>2</sup> was considered diagnostic of  
45 central canal stenosis. Similarly, lateral recess depth and foraminal diameter measurements of less  
46 than 3mm have been considered diagnostic of lateral recess and foramina stenosis respectively.  
47  
48

#### 49 Provision of MRI results to participants

50  
51 MRI scans requested for the purpose of the trial and not as part of a participant's clinical  
52 management are research investigations only. These are collected and assessed by the trial  
53 radiologist. If a serious spinal pathology is identified, the participant's GP and/or Spinal Consultant  
54 are immediately informed. If no serious pathology is identified then scan results will be made  
55  
56  
57  
58  
59  
60

1  
2  
3 available to participants at the end of the study if requested. MRI reports will be sent to each  
4 participant's GP or spinal consultant so that scan results are explained to the participant  
5 appropriately.  
6

## 7 **Randomisation and masking**

8 Following baseline data collection, the researcher uses a web-based service to randomise the  
9 participants. During this process, the researcher is not informed of the treatment allocation. Instead,  
10 an automated email is sent directly to the physiotherapists who provide the interventions.  
11  
12

13 The web-based randomisation service is provided by the Oxford Clinical Trials Research Unit (OCTRU)  
14 consistent with UK Clinical Research Collaboration (UKCRC) approved standard operating  
15 procedures, ensuring prospective registration and allocation concealment. Randomisation is  
16 stratified by centre, age (65-74 years and 75 years+), and gender. Participants are randomised in a  
17 2:1 ratio (intervention:control) to ensure that there are enough participants to run a group  
18 intervention and minimise waiting times.  
19  
20

21 Physiotherapists delivering the interventions and participants cannot be masked to treatment  
22 allocation. All participants receive an initial one hour appointment. For those randomised to the  
23 BOOST programme, this is an assessment prior to attending the group sessions. For those  
24 randomised to the control arm, it is their initial physiotherapy session to deliver best practice advice.  
25 During this appointment, participants are informed of their treatment allocation by the  
26 physiotherapist. To ensure that researchers collecting follow up data remain masked to treatment  
27 allocation, physiotherapists and participants are asked not to share information about treatment  
28 allocation with researchers.  
29  
30

31 The trial statistician and the research staff undertaking quality assurance checks and the qualitative  
32 study are not blinded to treatment allocation. The remaining members of the trial management  
33 team, including all those who are involved in data management, are masked to treatment allocation.  
34  
35

## 36 **Outcome measures**

37 Follow up data is collected at 6 and 12 months after randomisation, at a clinic appointment. The  
38 outcomes are listed in Table 3.  
39

### 40 *Primary outcome*

41  
42 The primary outcome is low back pain disability measured using the Oswestry Disability Index (ODI  
43 v2.1a)<sup>27 28</sup> at 12 months after randomisation. The ODI is quite widely used as a measure for NC, and  
44 very widely used in the field of back pain. A comparison of the psychometric properties of four of  
45 the most promising self-report measures for NC demonstrated that the ODI had superior properties  
46 to other measures<sup>27</sup>. It is highly applicable to NC because it includes items on standing and walking.  
47 Scores range from 0-100, with higher scores indicating greater disability. Participants are asked to  
48 consider back and leg symptoms when responding including discomfort, heaviness, aching, tingling  
49 and numbness. Responses are not limited to the impact of back pain only.  
50  
51  
52

### 53 *Secondary outcomes*

54  
55 A range of self-reported and physical measures are collected to evaluate the impact of the  
56 intervention on key treatment targets (symptoms of neurogenic claudication, mobility, physical  
57  
58  
59

activity, strength, balance, frailty and falls and cognitive and behavioural factors related to adherence with exercise and improving physical activity levels).

#### *Self-reported measures*

Self-reported measures related to symptoms and their impact include the Swiss Spinal Stenosis Questionnaire<sup>27</sup>, global rating of change<sup>29</sup>, satisfaction with treatment using a 5 point scale constructed for the trial, health-related quality of life measured using the EQ-5D-5L<sup>30</sup>, and how well participants are managing their leg and back symptoms on a 10 point scale constructed for the trial.

Information is collected about cognitive and behavioural factors targeted during the intervention that are hypothesised to mediate effects of the intervention. Fear-avoidance is measured using the Fear Avoidance Beliefs Questionnaire<sup>31</sup>. Self-efficacy is measured from different perspectives. Participants rate their confidence to walk half a mile using a single item from the Modified Gait Self-efficacy Scale<sup>32</sup>. To understand maintenance of exercise and physical activity, drawing on theoretical and empirical literature on this topic<sup>33</sup>, participants also rate their confidence to restart their exercises having stopped them (self-efficacy recovery<sup>33 34</sup>), and their confidence to maintain their exercises in the long term (self-efficacy maintenance<sup>33 34</sup>). Measures related to the adherence of exercises and increasing physical activity are collected using the Index of Habit<sup>35</sup>, self-reported frequency of exercise and satisfaction with their attempts to increase their physical activity<sup>36</sup> measured on a 5 point scale constructed for the trial. Change in mobility in the last 6 months is measured using a 5 point scale constructed for the trial.

A range of measures are collected to capture constructs related to ageing. Frailty is measured using the Tilburg Frailty Index<sup>37</sup> and information about falls and fall related injuries is collected as recommended by the Prevention of Falls Network Europe (ProFANE)<sup>38</sup>. Beliefs about ageing are measured using the physical changes subscale of the Attitudes to Ageing Questionnaire<sup>23</sup>.

Health resource use will be collected using the Client Service Receipt Inventory<sup>39</sup>.

#### *Physical assessment*

A measure of postural alignment is undertaken to quantify the degree of thoracic kyphosis<sup>40 41</sup>. The participant removes their shoes and socks and stands as upright as possible, with their sacrum and back against the wall, with hands by their sides. The researcher measures the distance from the spinous process of the seventh cervical vertebrae to the wall using a ruler. It is an alternative to the occiput to wall measurement, but reflects kyphosis better as it minimises error due to head position<sup>40 41</sup>.

We then collect measures related to mobility, balance and strength which are important targets of the intervention and markers related to ageing and frailty.

The Short Physical Performance Battery (SPPB)<sup>42</sup> measures three aspects of physical performance: standing balance, walking speed and the time taken to perform five chair stands. An overall score is given by adding the scores for each test. Researchers follow published guidance on the test which is, briefly, as follows<sup>42</sup>:

Standing balance

1  
2  
3 Standing balance is rated on a scale of 0-4 according to the participant's ability to maintain three test  
4 positions (side by side stance, semi-tandem and full tandem) for 10 seconds.

#### 5 6 Walking speed

7  
8 Walking speed is measured on an eight feet long walking course with no obstructions for a further  
9 two feet at each end. The participant is instructed to "Walk to the other end of the course at your  
10 usual speed, just as if you were walking down the street to go to the shop." The time taken for the  
11 participant to walk between the two markers is recorded to the nearest 0.1 seconds. The test is  
12 carried out twice and the faster of the two times is used to score the test on a scale of 0-4.

#### 13 14 15 Chair stands

16  
17 The participant sits in a straight-backed chair with their arms folded across their chest. They are  
18 given the following instructions: "Now stand up straight 5 times in succession, as fast as you can".  
19 The time taken to perform the 5 chair stands (from the initial sitting position to the final standing  
20 position at the end of the fifth stand) is used to score the test on a scale of 0-4. If the participant is  
21 unable to complete the test then they are given a score of 0.

22  
23  
24 The six minute walk test (6MWT)<sup>43</sup> measures the distance that the participant is able to walk in 6  
25 minutes. The researcher marks out an indoor walking course which is flat and straight and marked  
26 with cones at each end. The length of the test track is standardised at each site to ensure that the  
27 follow-up assessments are carried out on the same length test track. The recommended length of  
28 the course is a minimum of 10m in total but it is dependent on the space available at each site.

29  
30  
31 One lap consists of walking to the turnaround point of the course and returning to the start point.  
32 All researchers were provided with a 6MWT compact disc which is played during the test and counts  
33 down the 6 minutes of the walking test while the researcher counts the number of laps with a lap  
34 counter.

35  
36  
37 Prior to starting the test, the researcher also asks the participant if they have symptoms of NC. If  
38 they do not have any symptoms when starting, the participant is asked to verbally indicate if they  
39 begin to experience symptoms during the test. The distance at which their symptoms begin is  
40 recorded by the researcher.

41  
42 The researcher measures the participant's hand grip strength<sup>44</sup> using a Jamar + Dynamometer and  
43 follows the protocol outlined by Robert et al<sup>45</sup>. The participant is seated in a chair with arms, with  
44 their hips, knees and ankles at 90°, and their feet flat on the ground. The participant's arm is  
45 supported on the armrest with their wrists level with the end of the armrest. During the test the  
46 researcher supports the weight of the dynamometer. Using standardised instructions, the  
47 participant is instructed to squeeze the handle of the dynamometer until they reach a maximal  
48 contraction and hold for 5 seconds. The procedure is repeated on the other side. Three  
49 measurements are taken on each hand allowing at least 30 seconds rest between measurements on  
50 the same hand. The highest reading is used as the summary measure.

#### 51 52 53 **Follow up procedures**

54  
55 All participants are invited to attend a face-to face clinic appointment at six and 12 months. This is  
56 arranged by the researcher at each site. However, if a participant is unable to attend the clinic



1  
2  
3 appointment, they are mailed a questionnaire that contains the primary outcome, all self-reported  
4 items and a participant completed version of the Client Service Receipt Inventory, but excludes the  
5 physical assessment. If the questionnaire is not returned within two weeks then a second copy of  
6 the questionnaire is sent by the BOOST Trial Office as a reminder. If this is not returned within a  
7 further two weeks, then the BOOST Trial Office carry out a reminder phone call. After another two  
8 weeks, if the questionnaire has not been returned, then the BOOST Trial Office will attempt to  
9 contact the participant by telephone and collect core outcomes consisting of the primary outcome  
10 (ODI), pain troublesomeness rating, whether they are on a waiting list for spinal surgery, EQ-5D-5L,  
11 self-rated walking ability, falls and falls related fractures, self-reported exercise adherence, and a  
12 brief version of the Client Service Receipt Inventory.  
13  
14

### 15 **Adverse events**

16 A safety reporting protocol has been developed to manage the reporting of related and unexpected  
17 serious adverse events (SAEs) and directly attributable adverse events (AEs). An AE is any untoward  
18 medical occurrence in a participant during a trial. There may or may not be a causal relationship with  
19 the trial intervention. AEs may be identified by the physiotherapists delivering the trial treatments or  
20 by researchers conducting follow up assessments who have been trained in reporting procedures.  
21 SAEs must be reported to the Trial Management Team within 24 hours of the physiotherapist or  
22 researcher becoming aware of the event. The Chief Investigator determines whether AEs require  
23 reporting to the Ethics Committee, Data Monitoring and Ethics Committee (DMEC) and Trial  
24 Sponsor.  
25  
26  
27

### 28 **Training and quality assurance of the research protocol**

29 Researchers undergo approximately four hours of training covering eligibility screening, consent  
30 taking and data collection. They are provided with a manual containing detailed instructions for all  
31 trial procedures. All researchers undergo a quality assurance check to ensure they are following the  
32 trial protocol. This involves a BOOST team member observing the researcher carrying out the  
33 eligibility screening, taking consent and collecting trial data. Trial paper work is checked for  
34 completeness. If any deviations from the protocol are identified then further training is provided.  
35  
36  
37

### 38 **Study interventions**

#### 39 **Control intervention- best practice advice**

40 The control intervention is Best Practice Advice which is delivered in a one to one session with a  
41 physiotherapist. Participants attend an initial appointment of up to one hour consisting of an  
42 assessment followed by the provision of advice and education. Advice and education includes  
43 education about NC, being physically active, use of medications, when to seek more advice and,  
44 prescription of a home exercise programme (up to 4 exercises). Flexion and trunk stabilisation are  
45 recommended but the physiotherapist may prescribe other exercises based on their assessment, if  
46 required. The physiotherapist may prescribe a walking aid if the assessment indicates (e.g. to  
47 improve walking by increasing stability or for pain relief). Participants are provided with written  
48 information. Ideally, the control intervention should be delivered in one session. A maximum of two  
49 half hour review appointments is permitted. During these sessions they can re-enforce verbal advice  
50 given, and review walking aids or exercises provided in the initial session, but are not permitted to  
51 provide treatments such as manual therapy, electrotherapy, acupuncture, hydrotherapy or  
52 structured exercise sessions.  
53  
54  
55  
56  
57  
58  
59  
60



1  
2  
3 The content of the control intervention has been informed by a survey of current physiotherapy  
4 practice<sup>46</sup> and through consultation with clinicians and patient representatives. Physiotherapy  
5 provision in the NHS is variable for this patient group. Many patients are not referred for  
6 physiotherapy, some receive advice on self-management at physiotherapy spinal clinics and some  
7 receive a course of physiotherapy comprising of advice and exercises. Comer et al<sup>8</sup> compared a  
8 single advice and education session with up to 6 sessions of standard physiotherapy and showed no  
9 difference in outcomes. We recommend that the majority of participants receive one session of  
10 advice and education as no additional benefit has been demonstrated from extra sessions of  
11 standard physiotherapy. However, there are situations where the treating physiotherapist will feel  
12 that a review appointment is necessary (e.g. if they have provided a walking aid and need to review  
13 its use) so this is permissible and we felt broadly reflected usual care in the NHS.  
14  
15

### 16 **Experimental intervention – The BOOST programme**

17 The BOOST programme will be described in full according to the TIDIER guidance<sup>47</sup> elsewhere,  
18 including the rationale and development. A brief summary is provided here.  
19  
20

21 Participants are invited to attend twelve 90 minute group sessions over a 12-week period. We  
22 recommend that one physiotherapist delivers the BOOST programme to a group of 6 participants. If  
23 larger groups are conducted then a physiotherapy assistant or another physiotherapist may be  
24 required. Prior to attending the programme, each participant attends an individual appointment (up  
25 to one hour) for an assessment and to set their individualised exercise and walking circuit targets for  
26 the group sessions. The baseline target for the strengthening exercise is tailored to each participant  
27 by varying the number of repetitions and sets, and the addition of weights as applicable.  
28  
29

30 Each session follows the same format. Participants take part in an education and discussion session,  
31 facilitated by the physiotherapist (30 minutes) and incorporating behavioural change strategies to  
32 encourage adherence with home exercises. This is followed by the exercise programme lasting  
33 approximately one hour. There is a short warm-up of seated exercises performed as a group which  
34 includes arm raises, trunk rotation, pelvic tilting and knee lifts. Then participants undertake a circuit  
35 of strengthening (sitting knee extension, sit to stand, standing hip abduction and standing hip  
36 extension), stretching (a combined hip flexor and calf stretch) and a balance exercise<sup>48,49</sup>. Each  
37 participant undertakes their individually tailored programme which is progressed over the 12 weeks.  
38 The strengthening exercises are progressed by increasing the number of repetitions and sets,  
39 increasing the load or adding speed. The final part of the exercise element is a supervised walking  
40 circuit, designed to improve walking ability and fitness<sup>48</sup> which is also progressed over the 12 weeks  
41 by increasing the distance walked, increasing walking speed, adding balance challenges such as stairs  
42 or obstacles or adding weights. The exercises carried out during the supervised sessions make up the  
43 home exercise programme (warm up, exercise circuit and walking).  
44  
45  
46  
47  
48

49 Participants attend the supervised sessions twice a week for sessions 1-6. As they progress through  
50 the programme attendance becomes less frequent (weekly for sessions 7-9, then fortnightly for  
51 sessions 10-12). The home exercise programme is introduced during Session 5 so that participants  
52 begin to undertake their home exercise programme while supported by the physiotherapist. On  
53 completion of the 12 group sessions, participants are asked to carry out their home exercise  
54 programme at least twice per week so that it becomes a habitual activity.  
55  
56  
57  
58  
59  
60

1  
2  
3 The physiotherapist monitors progress during the programme by asking participants to rate how  
4 well they feel they are managing their condition (0-10 Numerical Rating Scale) and how their  
5 symptoms are affecting walking (walking item from the Oswestry Disability Index) at the pre-group  
6 assessment, and at Sessions 3, 6, 9 and 12. At the end of the 12 week programme the  
7 physiotherapist carries out two follow-up telephone reviews with each participant to promote long  
8 term adherence with the home exercise programme. These take place approximately one and two  
9 months after completing the supervised sessions, and take approximately 15 minutes each.

### 12 **Concomitant care**

13 Participants may seek other forms of treatment during the trial if they feel it is necessary. Additional  
14 treatments accessed by participants, including contact with their GP or other health professionals,  
15 will be recorded on the Client Service Receipt Inventory<sup>39</sup> at follow up.

### 18 **Physiotherapist training and quality assurance of intervention delivery**

19 The interventions are delivered by physiotherapists registered with the Health and Care  
20 Professionals Council. All physiotherapists delivering the BOOST programme attend a one-day  
21 training course, are provided with an intervention manual and undertake three hours online  
22 training. All physiotherapists delivering the control intervention attend three hours of training and  
23 are provided with an intervention manual. At some sites, the same physiotherapist delivers both  
24 arms of the trial. Both interventions are delivered according to a manualised protocol to reduce the  
25 risk of introducing bias to the study and routine quality assurance checks are conducted. Visits are  
26 made to each site and at least one session of each intervention is observed. Feedback is provided to  
27 the physiotherapist on completion of the session and any issues or training needs identified. Another  
28 visit is arranged if substantial concerns are identified.

31 A structured check list is used to monitor intervention delivery and ensure that all elements of the  
32 interventions are delivered as intended. We developed the education and discussion session of the  
33 BOOST programme with the assistance of a CB Therapist who also assisted with training. The CB  
34 Therapist helped to develop the checklist for the BOOST programme to ensure all the necessary  
35 components of the education and discussion section of the session were covered. The checklist is  
36 completed during the observed session. The education and discussion session may also be assessed  
37 via recording (depending on resources and BOOST staff capacity). All participants provide consent  
38 for sessions to be recorded for quality assurance purposes when they enrol in the study and we seek  
39 verbal consent from the physiotherapist.

43 Following initial quality assurance checks and feedback, we also undertake fidelity assessments of  
44 both interventions that is not fed back to the physiotherapists. Feedback at this stage is not provided  
45 as we need to understand how this intervention would be delivered in the clinical setting if it were  
46 to be implemented.

49 A structured record of the interventions (treatment log) is completed by the physiotherapists and  
50 used to monitor fidelity. We collect attendance rates to monitor adherence with the interventions.  
51 Additional site visits will be conducted if any problems with intervention delivery are identified.

### 54 **Sample size**

55 At 80% power and 5% 2-sided significance levels, the proposed sample size is 321 participants in  
56 total providing data at 12-month follow-up (214 in the intervention arm and 107 in the control arm),  
57

1  
2  
3 after which inflation for potential loss to follow-up (20%) yields an overall target of 402 (268  
4 intervention, 134 control). If power is increased to 90%, then a sample size of 429 (286 in the  
5 intervention arm and 143 in the control arm) is required, after which inflation for potential loss to  
6 follow-up (20%) yields an overall target of 540 (360 intervention, 180 control).  
7

8 These calculations have been based on the assumption that a between-group difference of five  
9 points is considered clinically significant on the Oswestry Disability Index (ODI), with a baseline  
10 standard deviation of 15, consistent with published estimates in older populations and those with  
11 NC<sup>50 51</sup>. This yields a standardised difference of 0.33, a moderate effect size, which is consistent  
12 with being a reasonable target for a pragmatic trial<sup>52</sup>.  
13  
14

15 The loss to follow-up of 20% has been based on recent experiences of rehabilitation trials in older  
16 adults<sup>53</sup>. We estimate that the therapist effects will be negligible from data that we have  
17 generated/published from a series of trials using similar standardised interventions. Our recent trials  
18 of hand exercises in rheumatoid arthritis and cognitive behavioural interventions in low back pain  
19 generated an Intra Cluster Correlation (ICC) of less than 0.0001<sup>54 55</sup>. We anticipate about 20  
20 therapists delivering the intervention, treating an average of 12-15 participants each. We have not  
21 incorporated a formal inflation for a therapist effect as the loss to follow-up allowance is generous,  
22 and should mitigate against any moderate to large therapist effects.  
23  
24

25 The sample size is a minimum of 402 participants and a maximum of 540, to be finalised following a  
26 review of the sample size assumptions (in particular any evidence of clustering or a larger baseline  
27 standard deviation) by the DMEC. A number of assumptions in the sample size estimate will be  
28 checked at this interim time point and adaptations made if needed, including the baseline standard  
29 deviation of the ODI and the observed ICC. The DMEC will review these assumptions at this time-  
30 point and make recommendations regarding the final sample size to the Trial Management Group  
31 and Programme Steering Committee. No interim analysis of the primary outcome will be performed.  
32  
33  
34

## 35 Analysis

36 Data will be reported in accordance with the Consolidated Standards of Reporting Trials (CONSORT)  
37 guidelines for randomised controlled trials and the appropriate extensions<sup>56</sup>. A final statistical  
38 analysis plan will be developed by the end of the recruitment period, and we provide an outline  
39 description here. The primary analysis will be 'intention to treat', where participants will be included  
40 in their randomised groups. Effect estimates together with their 95% confidence intervals will be  
41 reported. The primary outcome, ODI at 12 months, will be analysed using a linear multivariable  
42 regression multi-level method to take account of any therapist effect and adjusted for the region,  
43 baseline ODI score, stratification and important prognostic variables.  
44  
45

46 Missing data will be minimised by careful data management and training. The nature and  
47 mechanism for missing variables and outcomes will be investigated, and if appropriate multiple  
48 imputation will be used. Sensitivity analyses will be undertaken, assessing the underlying missing  
49 data assumptions.  
50  
51

52 A secondary complier average causal effect (CACE) analysis<sup>57</sup> will explore the effect of adherence  
53 with the intervention (attendance and the participants' engagement with the programme rated by  
54 the physiotherapist<sup>58</sup>). For the purposes of the primary CACE analysis we will define adherence as  
55 attending at least 9 out of the 12 sessions (75%). This would ensure that the majority of  
56  
57

1  
2  
3 educational/discussion content is delivered. No one session is considered more important than  
4 another regarding educational/discussion content. Core CB concepts are introduced during the  
5 earlier sessions, are re-iterated during subsequent sessions so attendance at 9 sessions would  
6 ensure all core content is covered. Attendance at nine sessions will ensure that the participant is  
7 introduced to the home exercise programme and has undertaken the exercise programme for a  
8 minimum of six weeks (Sessions 1 -9 are delivered over a 6 week period). Six weeks of strength  
9 training has been shown to be sufficient to result in short term improvements in muscle strength  
10 and physical function<sup>59-61</sup>.

11  
12  
13 We have also defined *a priori* subgroup criteria based on the published literature and will explore  
14 treatment effects by age (65-74 years/75 years +), gender (male/female), Tilberg Frailty Index scores  
15 (0-4/5+<sup>37</sup>), Fear Avoidance Beliefs Questionnaire scores (0-14/15+<sup>62</sup>), STartBack Risk Stratification  
16 score low/medium/high risk groups<sup>21</sup>), hand grip strength (men: <30/30+; women<20/20+<sup>63</sup>) and  
17 Short Physical Performance Battery Scores (SPPB 0-6 Low performance; SPPB 7-9 Intermediate  
18 performance; SPPB 10-12 High Performance<sup>63</sup>) Amongst participants that have an MRI scan prior to  
19 randomisation, we will estimate treatment effects in two-sub-groups defined by MRI parameters  
20 (cross-sectional spinal canal area cut-point of 100mm<sup>2</sup><sup>26</sup>). Subgroup effects will be analysed using  
21 interaction with treatment tests and will be displayed using forest plots<sup>64</sup>.

22  
23  
24  
25 We will carry out a series of additional exploratory sub-group and interaction analyses to identify  
26 other MRI scan parameters and baseline factors that predict change in ODI scores between baseline  
27 and 12 months. Interaction and polynomial terms will be considered when carrying out the  
28 exploratory analysis, and the analyses may be based on continuous or binary cut-points. These  
29 models will report variables that predict the outcome at 12 months with 95% confidence intervals  
30 and p-value. These additional analyses will be presented in secondary publications and with  
31 appropriate caveats about the interpretation of exploratory sub-group analyses.

32  
33  
34 Further supplementary analysis may include mediation analysis to evaluate treatment mechanisms,  
35 and exploratory analyses of exercise dose effects including profiling of treatment response  
36 trajectories. These are *a priori* analyses based on the logic model used to develop the intervention,  
37 and will examine (a) whether the intervention affects hypothesised mediators as intended, (b)  
38 whether changes in hypothesised mediators relate to changes in outcomes, and (c) whether effects  
39 of intervention on outcomes is attributable to changes in the hypothesised causal pathway.

## 40 41 42 **Economic evaluation**

43 A prospective economic evaluation, conducted from an NHS and personal social services (PSS)  
44 perspective, is integrated into the trial design. The economic evaluation will estimate the difference  
45 in the cost of resources used by participants in the two arms of the trial, enabling costs and  
46 consequences to be compared between alternative forms of physiotherapy. The economic  
47 assessment method will adhere to the recommendations of the NICE Reference Case<sup>65</sup>.

48  
49  
50 We will estimate the costs of delivering the intervention, including development and training, the  
51 cost of delivering sessions, and participant follow-up/management. Broader resource utilisation is  
52 captured through two principal sources: (i) participant interview administered at 6 and 12 months  
53 post-randomisation and (ii) routine health service data collection systems (Hospital Episode  
54 Statistics). Unit costs for health and social care resources will be derived from local and national  
55  
56  
57

sources<sup>66</sup>. Costs will be standardised to current prices where possible. Health-related quality of life will be measured at baseline and at 6 and 12 months post-randomisation using the generic EuroQol EQ-5D-5L; national tariff sets will be used to generate quality-adjusted life-years (QALYs)<sup>67-69</sup>. We will in the first instance use self-report of the EuroQol EQ-5D-5L measure. Multiple imputation methods will be used to impute missing data and avoid biases associated with complete case analysis<sup>70</sup>. The results of the economic evaluation will be expressed in terms of incremental cost per QALY gained. Non-parametric bootstrap estimation will be used to derive 95% confidence intervals for mean cost and QALY differences between the trial groups, as well as to populate a cost-effectiveness plane. A series of sensitivity analyses will be undertaken to explore the implications of uncertainty on the incremental cost-effectiveness ratios and to consider the broader issue of the generalisability of the study results. The full details of the economic evaluation will be described in the health economic analysis plan.

### Qualitative study

The aims of the qualitative study are to better understand participant experiences both of living and ageing with NC, and their experience of the interventions delivered during the trial. Understanding the experiences of the participants will inform strategies for implementation if the intervention is clinically effective.

All participants recruited to the trial are eligible. As part of the consent process for the trial, participants are informed about the interview study and asked if they are willing to be contacted by a researcher to receive more information. Participants who agree are provided with an additional information sheet and contacted by the qualitative research team. Prior to starting the first interview, written consent is sought. Consent is reaffirmed verbally prior to each follow up telephone interviews.

We are interviewing participants at three time points over the course of the trial in order to capture physical, psychological, social and contextual change. Topics explored include current impact of NC on day-to-day life and wellbeing, beliefs about the role of exercise in ameliorating symptoms, the role of exercise on slowing/reversing physical decline, and how these beliefs impact on adherence to the treatments.

We estimate 60 participants will be required to ensure data saturation is reached in all three interviews whilst ensuring diversity of participants by age, gender, ethnicity, and intervention arm, allowing for attrition over the course of the study<sup>71 72</sup>. In any one recruitment site interview participants are recruited consecutively, and as recruitment proceeds sampling is adjusted to ensure diversity of age, gender, ethnicity and intervention arm.

Interviews are semi-structured using pre-specified open-ended questions. The interviewer uses prompts to further investigate responses, and allows the participant to explore topics they feel are relevant<sup>71 73</sup>. The first interview takes place at a location convenient to the participant, usually their home. The second and third interviews are telephone interviews to reduce resource implications for the project. However, if a telephone conversation is unfeasible (e.g. poor hearing) then subsequent interviews are conducted face-to-face.

The first interview takes place between randomisation and starting treatment. Participants do not yet know their treatment allocation. Questions focus on the impact of NC on the participant's

1  
2  
3 physical and psychosocial health, their beliefs around exercise and ageing, and concerns and hopes  
4 regarding the intervention. The interview takes up to 90 minutes, and is audio recorded.  
5

6 The second interview is approximately one month after completing treatment. Topics explored  
7 include the participant's experiences of the intervention, adherence to home exercises, and any  
8 changes in their symptoms, exercise and aging beliefs, physical activity levels, or life circumstances.  
9 The third interview coincides with the 12-month follow-up assessment and further explores these  
10 topics, and how they may have changed after an extended period of self-management. Interview  
11 schedules are adapted to account for data captured in earlier interviews, and the interviewer has  
12 access to the outcome measures for each interviewee for exploration during the interview. The  
13 telephone interviews are recorded, and notes are transcribed by the interviewer from the audio  
14 recordings.  
15  
16

17 Audio recordings of first interviews are transcribed verbatim by an independent transcriber,  
18 anonymised and allocated an ID number. The telephone interview notes are checked against the  
19 audio-recordings, and linked to the first interview through the ID number. Participants are sent a  
20 copy of the transcripts if requested, and may delete any information they would not like to be used.  
21  
22

23 All transcripts are imported into NVivo and analysed using thematic analysis<sup>74</sup>. Coding is undertaken  
24 as each transcript is received. We will undertake cross-case analysis<sup>75</sup> To understand trajectories of  
25 change in relation to back pain and NC we will undertake longitudinal case comparative analysis, an  
26 approach to analysis used previously by the research team<sup>76</sup>.  
27  
28

### 29 **Trial management**

30 This trial is run by a UKCRC fully registered clinical trials unit, according to approved and audited  
31 standard operating procedures. All trial staff undergo regular training to ensure they are compliant  
32 with Good Clinical Practice and other relevant legislation and the requirements such as the Data  
33 Protection Act.  
34  
35

### 36 **Data management and checking**

37 All data is processed according to the Data Protection Act 1998 and all documents are stored safely  
38 in confidential conditions. Each participant is provided with a unique trial identification number.  
39 Data is entered manually onto the trial database (OpenClinica). The BOOST Trial Office review all  
40 data collection forms for completeness and accuracy using automated validation checks, querying  
41 missing and nonsensical data with sites, according to trial specific procedures which have been  
42 developed to ensure data quality.  
43  
44

### 45 **Patient and Public Involvement**

46  
47 During the application process for this trial, we assembled a Patient and Public Involvement group  
48 and we have continued to work closely with them. Ms Judith Fitch is the lead PPI representative and  
49 a co-applicant and contributed to the design of the trial. We appointed a PPI representative to be an  
50 independent member of the Programme Steering Committee. PPI engagement has been undertaken  
51 in face-to-face meetings and via emails and phone calls to make it as convenient as possible for the  
52 PPI group to contribute. PPI representatives have assisted with the development of the  
53 physiotherapy intervention. Two PPI representatives attended the intervention development day  
54 along with clinicians and researchers. One PPI representative carried out the proposed exercise  
55  
56  
57



1  
2  
3 programme in her home so she could give feedback on the practicalities of performing the proposed  
4 programme. PPI representatives helped us to develop the patient materials for the intervention.  
5 Participant information leaflets, consent forms and posters advertising the trial have been reviewed  
6 by the PPI group and they have provided feedback on layout and wording. We have piloted  
7 questionnaires with our PPI group. PPI representatives have helped with developing interview  
8 schedules for the qualitative study and we will carry out some practice interviews with the PPI  
9 representatives prior to undertaking the actual study.  
10  
11

## 12 Ethics and dissemination

13 Ethics approval for the BOOST trial was given by the National Research Ethics Committee (REC  
14 number 16/LO/0349), on 03 March 2016. Site specific approvals were provided by NHS Research and  
15 Development Departments at each participating site. The Chief Investigator will submit and, where  
16 necessary, obtain approval from the above parties for all substantial amendments to the original  
17 approved documents.  
18  
19

20  
21 There were several ethical issues when designing this study. A study of older adults may identify  
22 individuals with previously unidentified cognitive impairment. As part of the screening process,  
23 participants complete the Abbreviated Mental Test. Individuals with a score of 6 or below (out of 10)  
24 are excluded as this suggests impaired cognitive function requiring further assessment<sup>15-17</sup>. The  
25 researchers, conducting the eligibility screening, are trained to deal with this and to recommend that  
26 the person visit their GP to for further assessment.  
27  
28

29 The study screening procedures may identify individuals who have signs of serious spinal pathology  
30 (e.g. cauda equina syndrome). In this case, the researcher would discuss it with the participant and  
31 as soon as possible with the local Principal Investigator and/or patient's spinal consultant or GP and  
32 take appropriate action.  
33

34 Some participants will undergo an MRI scan as a research investigation. Some participants may want  
35 the results of their scan. However, as participants would not have had access to a scan as part of  
36 their routine NHS care, we will only make results available at the end of the trial unless we detect a  
37 serious spinal pathology (e.g. spinal malignancy). In this situation, the participant's GP or Spinal  
38 Consultant will be informed immediately. If we were to provide the scan results, this may influence  
39 the beliefs of participants and their clinicians about the value of different treatments. This process is  
40 made clear to potential participants during the recruitment and consent procedures so participants  
41 understand the purpose of the MRI scan.  
42  
43  
44

45 The Programme Steering Committee (PSC) provides overall supervision of this research on behalf of  
46 the funder. It is comprised of the Chief Investigator, Project Lead, Trial Manager, Statistician and four  
47 independent members (including the committee chair). The PSC monitors trial progress and conduct  
48 and provides expert advice. In addition, a DMEC has been appointed. The DMEC consists of three  
49 independent experts with relevant clinical research and statistical experience. The DMEC has  
50 adopted a DAMOCLES charter<sup>77</sup> which defines its terms of reference and operation in relation to  
51 oversight of the trial. No interim outcome analysis is planned. Direct access to research data will be  
52 granted to authorised representatives of the Sponsor (University of Oxford), regulatory authorities  
53 or the host institution for monitoring and/or auditing of the study to ensure compliance with  
54 regulations.  
55  
56  
57  
58  
59  
60



1  
2  
3 The results will be published in a peer-reviewed journal and at conferences as well as in a report to  
4 the funder. A plain English summary will be made available on the BOOST website for participants  
5 (<https://boost.octru.ox.ac.uk/>).  
6  
7

## 8 **Contributors**

9  
10 EW is the lead author of this manuscript. LW, SD, KV, RG, SP and SL were involved in writing the  
11 manuscript. All authors have read and approved the final manuscript. SL is the Chief Investigator and  
12 the guarantor. EW, FG, SP, CH, NA, KB, JB, GC, JF, JF, DF, ZH and CM are co-applicants on the grant  
13 awarded by the NIHR Programme Grants for Applied Research (reference: PTC-RP-PG-0213-20002)  
14 and were involved in the design of the study and its implementation, as were AG as trial manager,  
15 AM as a research associate, SD and KV as trial statisticians, GB and VG as research physiotherapists,  
16 LW as the postdoctoral researcher responsible for the qualitative study, RG as the clinical research  
17 fellow (radiology) and BP as the trial health economist.  
18  
19

## 20 **Acknowledgments**

21 Thank you to the Patient and Public Involvement Representatives that have provided advice and  
22 feedback on the development of the intervention, patient materials and conduct of the trial.  
23  
24

## 25 **Funding**

26 This research is funded by the NIHR Programme Grants for Applied Research (reference: PTC-RP-PG-  
27 0213-20002). Preparatory work for the programme of research was supported by the Collaboration  
28 for Leadership in Applied Health Research and Care Oxford at Oxford Health NHS Foundation Trust.  
29 SL and EW receive funding from the Collaboration for Leadership in Applied Health Research and  
30 Care Oxford at Oxford Health NHS Foundation Trust and are supported by the NIHR Biomedical  
31 Research Centre, Oxford. CDM is funded by the NIHR Collaborations for Leadership in Applied Health  
32 Research and Care West Midlands, the NIHR School for Primary Care Research and a NIHR Research  
33 Professorship in General Practice (NIHR-RP-2014-04-026).  
34  
35  
36

## 37 **Disclaimer**

38 The views expressed are those of the author(s) and not necessarily those of the NHS, the NIHR or the  
39 Department of Health. The trial sponsor is the University of Oxford. The sponsor has no role in the  
40 trial design; collection, management, analysis or interpretation of data; writing of reports and  
41 submission for publication.  
42  
43

## 44 **Competing interests**

45 None declared.  
46

## 47 **Provenance and peer review**

48 This protocol was peer reviewed for ethical and funding approval prior to submission.  
49

## 50 **Data sharing statement**

51 The relevant anonymised patient level data will be made available on reasonable request from the  
52 authors following full reporting of the trial results and planned additional analyses.  
53  
54  
55  
56  
57  
58  
59  
60

## References

1. Ishimoto Y, Yoshimura N, Muraki S, et al. Prevalence of symptomatic lumbar spinal stenosis and its association with physical performance in a population-based cohort in Japan: the Wakayama Spine Study. *Osteoarthritis Cartilage* 2012;20(10):1103-8. doi: 10.1016/j.joca.2012.06.018
2. Suri P, Rainville J, Kalichman L, et al. Does this older adult with lower extremity pain have the clinical syndrome of lumbar spinal stenosis? *JAMA* 2010;304(23):2628-36. doi: 10.1001/jama.2010.1833
3. de Schepper EI, Overvest GM, Suri P, et al. Diagnosis of Lumbar Spinal Stenosis: An Updated Systematic Review of the Accuracy of Diagnostic Tests. *Spine (Phila Pa 1976)* 2013;38(8):E469-E81. doi: 10.1097/BRS.0b013e31828935ac
4. Deyo RA, Mirza SK, Martin BI, et al. Trends, major medical complications, and charges associated with surgery for lumbar spinal stenosis in older adults. *JAMA* 2010;303(13):1259-65. doi: 10.1001/jama.2010.338
5. Kovacs FM, Urrútia G, Alarcón JD. Surgery versus conservative treatment for symptomatic lumbar spinal stenosis: a systematic review of randomized controlled trials. *Spine (Phila Pa 1976)* 2011;36(20):E1335-51. doi: 10.1097/BRS.0b013e31820c97b1
6. Zaina F, Tomkins-Lane C, Carragee E, et al. Surgical versus non-surgical treatment for lumbar spinal stenosis. *Cochrane Database Syst Rev* 2016(1):Cd010264. doi: 10.1002/14651858.CD010264.pub2 [published Online First: 2016/01/30]
7. Kreiner DS, Shaffer WO, Baisden J, et al. Evidence-based clinical guidelines for multidisciplinary spine care: diagnosis and treatment of degenerative lumbar spinal stenosis: North American Spine Society, 2011.
8. Comer C, Redmond AC, Bird HA, et al. A home exercise programme is no more beneficial than advice and education for people with neurogenic claudication: results from a randomised controlled trial. *PLoS One* 2013;8(9):e72878. doi: 10.1371/journal.pone.0072878
9. Ammendolia C, Stuber KJ, Rok E, et al. Nonoperative treatment for lumbar spinal stenosis with neurogenic claudication. *Cochrane Database Syst Rev* 2013;8:CD010712. doi: 10.1002/14651858.CD010712
10. May S, Comer C. Is surgery more effective than non-surgical treatment for spinal stenosis, and which non-surgical treatment is more effective? A systematic review. *Physiotherapy* 2013;99:12-20. doi: 10.1016/j.physio.2011.12.004
11. Jarrett MS, Orlando JF, Grimmer-Somers K. The effectiveness of land based exercise compared to decompressive surgery in the management of lumbar spinal-canal stenosis: a systematic review. *BMC Musculoskelet Disord* 2012;13:30. doi: 10.1186/1471-2474-13-30
12. Iversen M, Choudhary V, Patel S. Therapeutic exercise and manual therapy for person with lumbar spinal stenosis. *Int J Clin Rheumatol* 2010;5(4):425-37.
13. Macedo LG, Hum A, Kuleba L, et al. Physical Therapy Interventions for Degenerative Lumbar Spinal Stenosis: A Systematic Review. *Phys Ther* 2013 doi: 10.2522/ptj.20120379
14. Qureshi KN, Hodkinson HM. Evaluation of a ten-question mental test in the institutionalized elderly. *Age Ageing* 1974;3(3):152-7. [published Online First: 1974/08/01]
15. Sheehan B. Assessment scales in dementia. *Ther Adv Neurol Disord* 2012;5(6):349-58. doi: 10.1177/1756285612455733 [published Online First: 2012/11/10]
16. Foroughan M, Wahlund LO, Jafari Z, et al. Validity and reliability of Abbreviated Mental Test Score (AMTS) among older Iranian. *Psychogeriatrics* 2017 doi: 10.1111/psyg.12276 [published Online First: 2017/06/08]
17. Sarasqueta C, Bergareche A, Arce A, et al. The validity of Hodkinson's Abbreviated Mental Test for dementia screening in Guipuzcoa, Spain. *Eur J Neurol* 2001;8(5):435-40. [published Online First: 2001/09/14]

18. Kuorinka I, Jonsson B, Kilbom A, et al. Standardised Nordic questionnaires for the analysis of musculoskeletal symptoms. *Appl Ergon* 1987;18(3):233-7. [published Online First: 1987/09/01]
19. Parsons S, Breen A, Foster NE, et al. Prevalence and comparative troublesomeness by age of musculoskeletal pain in different body locations. *Fam Pract* 2007;24(4):308-16. doi: 10.1093/fampra/cmm027 [published Online First: 2007/07/03]
20. Syddall HE, Westbury LD, Cooper C, et al. Self-reported walking speed: a useful marker of physical performance among community-dwelling older people? *J Am Med Dir Assoc* 2015;16(4):323-8. doi: 10.1016/j.jamda.2014.11.004 [published Online First: 2014/12/20]
21. Hill JC, Dunn KM, Lewis M, et al. A primary care back pain screening tool: identifying patient subgroups for initial treatment. *Arthritis Rheum* 2008;59(5):632-41. doi: 10.1002/art.23563 [published Online First: 2008/04/29]
22. Resnick B, Jenkins LS. Testing the reliability and validity of the Self-Efficacy for Exercise scale. *Nurs Res* 2000;49(3):154-9. [published Online First: 2000/07/06]
23. Laidlaw K, Power MJ, Schmidt S. The Attitudes to Ageing Questionnaire (AAQ): development and psychometric properties. *Int J Geriatr Psychiatry* 2007;22(4):367-79. doi: 10.1002/gps.1683 [published Online First: 2006/10/20]
24. Moon ES, Kim HS, Park JO, et al. Comparison of the predictive value of myelography, computed tomography and MRI on the treadmill test in lumbar spinal stenosis. *Yonsei Med J* 2005;46(6):806-11.
25. Ishimoto Y, Yoshimura N, Muraki S, et al. Associations between radiographic lumbar spinal stenosis and clinical symptoms in the general population: the Wakayama Spine Study. *Osteoarthritis Cartilage* 2013;21(6):783-8. doi: 10.1016/j.joca.2013.02.656
26. Steurer J, Roner S, Gnannt R, et al. Quantitative radiologic criteria for the diagnosis of lumbar spinal stenosis: a systematic literature review. *BMC Musculoskelet Disord* 2011;12:175. doi: 10.1186/1471-2474-12-175 [published Online First: 2011/07/28]
27. Cleland JA, Whitman JM, Houser JL, et al. Psychometric properties of selected tests in patients with lumbar spinal stenosis. *Spine J* 2012;12(10):921-31. doi: 10.1016/j.spinee.2012.05.004
28. Fairbank JC. Why are there different versions of the Oswestry Disability Index? *J Neurosurg Spine* 2014;20(1):83-6. doi: 10.3171/2013.9.spine13344 [published Online First: 2013/11/12]
29. Kamper SJ, Maher CG, Mackay G. Global rating of change scales: a review of strengths and weaknesses and considerations for design. *J Man Manip Ther* 2009;17(3):163-70.
30. Herdman M, Gudex C, Lloyd A, et al. Development and preliminary testing of the new five-level version of EQ-5D (EQ-5D-5L). *Qual Life Res* 2011;20(10):1727-36. doi: 10.1007/s11136-011-9903-x
31. Waddell G, Newton M, Henderson I, et al. A Fear-Avoidance Beliefs Questionnaire (FABQ) and the role of fear-avoidance beliefs in chronic low back pain and disability. *Pain* 1993;52(2):157-68.
32. Newell AM, VanSwearingen JM, Hile E, et al. The modified Gait Efficacy Scale: establishing the psychometric properties in older adults. *Phys Ther* 2012;92(2):318-28. doi: 10.2522/ptj.20110053 [published Online First: 2011/11/15]
33. Kassavou A, Turner A, Hamborg T, et al. Predicting maintenance of attendance at walking groups: Testing constructs from three leading maintenance theories. *Health Psychol* 2014;33(7):752-6. doi: 10.1037/hea0000015 [published Online First: 2013/11/20]
34. Luszczynska A, Schwarzer R, Lippke S, et al. Self-efficacy as a moderator of the planning-behaviour relationship in interventions designed to promote physical activity. *Psychol Health* 2011;26(2):151-66. doi: 10.1080/08870446.2011.531571 [published Online First: 2011/02/15]
35. Verplanken B, Orbell S. Reflections on Past Behavior: A Self-Report Index of Habit Strength. *33* 2003;6:1313-30.

- 1  
2  
3 36. Rothman AJ, Baldwin AS, Hertel AW, et al., editors. *Self-Regulation and Behavior Change: Disentangling Behavioral Initiation and Behavioral Maintenance*. New York: Guilford Press, 2011.
- 4  
5  
6 37. Gobbens RJ, van Assen MA, Luijkx KG, et al. The Tilburg Frailty Indicator: psychometric properties. *J Am Med Dir Assoc* 2010;11(5):344-55. doi: 10.1016/j.jamda.2009.11.003
- 7  
8 38. Lamb SE, Jørstad-Stein EC, Hauer K, et al. Development of a common outcome data set for fall injury prevention trials: the Prevention of Falls Network Europe consensus. *J Am Geriatr Soc* 2005;53(9):1618-22. doi: 10.1111/j.1532-5415.2005.53455.x
- 9  
10 39. Beecham J, Knapp M. Costing psychiatric interventions: Gaskell London 2001.
- 11  
12 40. Wongsu S, Amatachaya P, Saengsuwan J, et al. Concurrent Validity of Occiput-Wall Distance to Measure Kyphosis in Communities. *J Clin Trials* 2012;2(2)
- 13  
14 41. Viitanen JV, Heikkilä S, Kokko ML, et al. Clinical assessment of spinal mobility measurements in ankylosing spondylitis: a compact set for follow-up and trials? *Clin Rheumatol* 2000;19(2):131-7. [published Online First: 2000/05/03]
- 15  
16 42. Guralnik JM, Simonsick EM, Ferrucci L, et al. A short physical performance battery assessing lower extremity function: association with self-reported disability and prediction of mortality and nursing home admission. *J Gerontol* 1994;49(2):M85-94. [published Online First: 1994/03/01]
- 17  
18 43. Bennell K, Dobson F, Hinman R. Measures of Physical Performance Assessments. *Arthritis Care and Research* 2011;63(S11):S350-S70.
- 19  
20 44. Roberts HC, Syddall HE, Cooper C, et al. Is grip strength associated with length of stay in hospitalised older patients admitted for rehabilitation? Findings from the Southampton grip strength study. *Age Ageing* 2012;41(5):641-6. doi: 10.1093/ageing/afs089
- 21  
22 45. Roberts HC, Denison HJ, Martin HJ, et al. A review of the measurement of grip strength in clinical and epidemiological studies: towards a standardised approach. *Age Ageing* 2011;40(4):423-9. doi: 10.1093/ageing/afr051 [published Online First: 2011/06/01]
- 23  
24 46. Comer CM, Redmond AC, Bird HA, et al. Assessment and management of neurogenic claudication associated with lumbar spinal stenosis in a UK primary care musculoskeletal service: a survey of current practice among physiotherapists. *BMC Musculoskelet Disord* 2009;10:121. doi: 10.1186/1471-2474-10-121
- 25  
26 47. Hoffmann TC, Glasziou PP, Boutron I, et al. Better reporting of interventions: template for intervention description and replication (TIDieR) checklist and guide. *Bmj* 2014;348:g1687. doi: 10.1136/bmj.g1687 [published Online First: 2014/03/13]
- 27  
28 48. Physical activity programs and behavior counseling in older adult populations. *Med Sci Sports Exerc* 2004;36(11):1997-2003. [published Online First: 2004/10/30]
- 29  
30 49. Byrne C, Faure C, Keene DJ, et al. Ageing, Muscle Power and Physical Function: A Systematic Review and Implications for Pragmatic Training Interventions. *Sports Med* 2016;46(9):1311-32. doi: 10.1007/s40279-016-0489-x
- 31  
32 50. Whitman JM, Flynn TW, Childs JD, et al. A comparison between two physical therapy treatment programs for patients with lumbar spinal stenosis: a randomized clinical trial. *Spine (Phila Pa 1976)* 2006;31(22):2541-9. doi: 10.1097/01.brs.0000241136.98159.8c
- 33  
34 51. Pua YH, Cai CC, Lim KC. Treadmill walking with body weight support is no more effective than cycling when added to an exercise program for lumbar spinal stenosis: a randomised controlled trial. *Aust J Physiother* 2007;53(2):83-9.
- 35  
36 52. Altman D. Practical statistics for medical research. London: Chapman & Hall/CRC 1991.
- 37  
38 53. Lamb SE, Williamson EM, Heine PJ, et al. Exercises to improve function of the rheumatoid hand (SARAH): a randomised controlled trial. *Lancet* 2014 doi: 10.1016/s0140-6736(14)60998-3 [published Online First: 2014/10/14]
- 39  
40 54. Williams MA, Williamson EM, Heine PJ, et al. Strengthening And stretching for Rheumatoid Arthritis of the Hand (SARAH). A randomised controlled trial and economic evaluation. *Health Technol Assess* 2015;19(19):1-222. doi: 10.3310/hta19190 [published Online First: 2015/03/10]
- 41  
42  
43  
44  
45  
46  
47  
48  
49  
50  
51  
52  
53  
54  
55  
56  
57  
58  
59  
60



- 1  
2  
3 55. Lamb SE, Lall R, Hansen Z, et al. A multicentred randomised controlled trial of a primary  
4 care-based cognitive behavioural programme for low back pain. The Back Skills Training  
5 (BeST) trial. *Health Technol Assess* 2010;14(41):1-253, iii-iv. doi: 10.3310/hta14410  
6  
7 56. Schulz KF, Altman DG, Moher D, et al. CONSORT 2010 Statement: updated guidelines for  
8 reporting parallel group randomised trials. *BMC Med* 2010;8:18. doi: 10.1186/1741-  
9 7015-8-18  
10  
11 57. Dunn G, Maracy M, Dowrick C, et al. Estimating psychological treatment effects from a  
12 randomised controlled trial with both non-compliance and loss to follow-up. *Br J*  
13 *Psychiatry* 2003;183:323-31.  
14  
15 58. Bellg AJ, Borrelli B, Resnick B, et al. Enhancing treatment fidelity in health behavior change  
16 studies: best practices and recommendations from the NIH Behavior Change  
17 Consortium. *Health Psychol* 2004;23(5):443-51. doi: 10.1037/0278-6133.23.5.443  
18 [published Online First: 2004/09/16]  
19  
20 59. Emerson NS, Stout JR, Fukuda DH, et al. Resistance training improves capacity to delay  
21 neuromuscular fatigue in older adults. *Arch Gerontol Geriatr* 2015;61(1):27-32. doi:  
22 10.1016/j.archger.2015.04.002 [published Online First: 2015/05/10]  
23  
24 60. Scanlon TC, Fragala MS, Stout JR, et al. Muscle architecture and strength: adaptations to  
25 short-term resistance training in older adults. *Muscle Nerve* 2014;49(4):584-92. doi:  
26 10.1002/mus.23969 [published Online First: 2013/07/31]  
27  
28 61. Fragala MS, Fukuda DH, Stout JR, et al. Muscle quality index improves with resistance  
29 exercise training in older adults. *Exp Gerontol* 2014;53:1-6. doi:  
30 10.1016/j.exger.2014.01.027 [published Online First: 2014/02/11]  
31  
32 62. Crombez G, Vlaeyen JW, Heuts PH, et al. Pain-related fear is more disabling than pain itself:  
33 evidence on the role of pain-related fear in chronic back pain disability. *Pain* 1999;80(1-  
34 2):329-39.  
35  
36 63. Cruz-Jentoft AJ, Baeyens JP, Bauer JM, et al. Sarcopenia: European consensus on definition  
37 and diagnosis: Report of the European Working Group on Sarcopenia in Older People.  
38 *Age Ageing* 2010;39(4):412-23. doi: 10.1093/ageing/afq034 [published Online First:  
39 2010/04/16]  
40  
41 64. Brookes ST, Whitley E, Peters TJ, et al. Subgroup analyses in randomised controlled trials:  
42 quantifying the risks of false-positives and false-negatives. *Health Technol Assess*  
43 2001;5(33):1-56. [published Online First: 2001/11/10]  
44  
45 65. NICE. Guide to the methods of technology appraisal In: Excellence NifHaC, ed.: NICE, 2013.  
46  
47 66. Graves N, Walker D, Raine R, et al. Cost data for individual patients included in clinical  
48 studies: no amount of statistical analysis can compensate for inadequate costing  
49 methods. *Health Econ* 2002;11(8):735-9. doi: 10.1002/hec.683  
50  
51 67. Dolan P. Modeling valuations for EuroQol health states. *Med Care* 1997;35(11):1095-108.  
52  
53 68. van Hout B, Janssen MF, Feng YS, et al. Interim scoring for the EQ-5D-5L: mapping the EQ-  
54 5D-5L to EQ-5D-3L value sets. *Value Health* 2012;15(5):708-15. doi:  
55 10.1016/j.jval.2012.02.008  
56  
57 69. Brazier J, Roberts J, Deverill M. The estimation of a preference-based measure of health from  
58 the SF-36. *J Health Econ* 2002;21(2):271-92.  
59  
60 70. Sterne JA, White IR, Carlin JB, et al. Multiple imputation for missing data in epidemiological  
and clinical research: potential and pitfalls. *BMJ* 2009;338:b2393.  
71. Britten N. Qualitative interviews in medical research. *BMJ* 1995;311(6999):251-3.  
72. Morse JM. Determining sample size. *Qualitative Health Research* 2000;10(1):3-5.  
73. Cohen D, Crabtree B. Semi-structured Interviews. Qualitative research guidelines project,  
2006.  
74. Braun V, Clarke V. Using thematic analysis in psychology. *Qualitative Research in Psychology*  
2006;3(2):77-101.  
75. Miles M, Huberman A. Qualitative data analysis. Second edition ed. Thousand Oaks: SAGE  
Publications Ltd 1994.  
76. Griffiths F, Borkan J, Byrne D, et al. Time, complexity and chronic back pain: a longitudinal  
qualitative study.: North America Primary Care Research Group., 2009.

- 1  
2  
3 77. DAMOCLES-Study-Group. A proposed charter for clinical trial data monitoring committees:  
4 helping them to do their job well. *Lancet* 2005;365(9460):711-22. doi: 10.1016/s0140-  
5 6736(05)17965-3 [published Online First: 2005/02/22]
- 6 78. Guralnik JM, Fried LP, Simonsick EM, et al. The Women's Health and Aging Study: Health and  
7 Social Characteristics of Older Women with Disability. Bethesda, MD: National Institute  
8 of Aging, 1995.
- 9 79. Parsons S, Carnes D, Pincus T, et al. Measuring troublesomeness of chronic pain by location.  
10 *BMC Musculoskelet Disord* 2006;7:34. doi: 10.1186/1471-2474-7-34 [published Online  
11 First: 2006/04/07]
- 12 80. Shival K, Kohl HW, 3rd, Bernstein I, et al. Sedentary behaviour and physical inactivity  
13 assessment in primary care: the Rapid Assessment Disuse Index (RADI) study. *Br J*  
14 *Sports Med* 2014;48(3):250-5. doi: 10.1136/bjsports-2013-092901 [published Online  
15 First: 2013/10/23]
- 16 81. **Fishbein M, Ajzen I. Predicting and changing behavior: The reasoned action approach.**  
17 New York: Psychology Press 2010.
- 18 82. Guralnik JM, Ferrucci L, Pieper CF, et al. Lower extremity function and subsequent disability:  
19 consistency across studies, predictive models, and value of gait speed alone compared  
20 with the short physical performance battery. *J Gerontol A Biol Sci Med Sci*  
21 2000;55(4):M221-31. [published Online First: 2000/05/16]
- 22 83. Pratt RK, Fairbank JC, Virr A. The reliability of the Shuttle Walking Test, the Swiss Spinal  
23 Stenosis Questionnaire, the Oxford Spinal Stenosis Score, and the Oswestry Disability  
24 Index in the assessment of patients with lumbar spinal stenosis. *Spine (Phila Pa 1976)*  
25 2002;27(1):84-91.
- 26  
27  
28  
29  
30  
31  
32  
33  
34  
35  
36  
37  
38  
39  
40  
41  
42  
43  
44  
45  
46  
47  
48  
49  
50  
51  
52  
53  
54  
55  
56  
57  
58  
59  
60

**Figure 1: Study flow chart****Table 1: Eligibility criteria****Inclusion criteria**

1. Registered with a primary care practice
2. 65 years and over
3. Participant is willing and able to give informed consent for participation in the RCT
4. Reports symptoms consistent with neurogenic claudication

**Exclusion criteria**

1. Living in a residential care or nursing home
2. Has a terminal condition with a life expectancy of less than 6 months
3. Any substantial health or social concern that, in the opinion of the patient's general practitioner, would place the patient at increased risk or inability to participate including known inability to provide informed consent e.g. Dementia.
4. Unable to walk three metres (width of a small room) without the help of another person
5. On a surgical waiting list
6. Presents with cauda equina syndrome or signs of serious pathology requiring immediate referral for investigations
7. Cognitive impairment (defined as an Abbreviated Mental Test score of 6 or less)
8. Registered blind
9. Unable to follow verbal instructions which would make participation in the experimental treatment arm of the trial impractical, for reasons including severe hearing impairment not corrected by a hearing aid or inability to follow simple safety instructions (e.g. English comprehension)



**Table 2 – Screening questions from the OPAL Cohort Study Questionnaire<sup>3</sup>**

| Questions                                                                                                                                                                                                                                                                                                                                                                 | Response required to be eligible for BOOST Trial |
|---------------------------------------------------------------------------------------------------------------------------------------------------------------------------------------------------------------------------------------------------------------------------------------------------------------------------------------------------------------------------|--------------------------------------------------|
| 1. In the past 6 WEEKS, have you had back pain <b>and/or</b> pain or other symptoms such as tingling, numbness or heaviness that travelled from your back into your buttocks or legs?<br>[Note: If the answer to this question is no, then the participant will not complete the remaining questions].                                                                    | Yes                                              |
| 1. Does standing make the pain or symptoms in your buttocks or legs worse?<br>2. Does walking make the pain or symptoms in your buttocks or legs worse?<br>3. Does sitting down make the pain or symptoms in your buttocks or legs better?<br>4. Does bending forward (for example to push a shopping trolley) make the pain or symptoms in your buttocks or legs better? | Yes to at least one of these questions           |

**Table 3: Data collection and outcomes for the BOOST Trial**

| Method                              | Domains measured           | Measure                                                                                                                                                                                                                                                                                                                                                                                                                                                                                                                                                                                                                                                                                                                                                                      | Time points                                     |
|-------------------------------------|----------------------------|------------------------------------------------------------------------------------------------------------------------------------------------------------------------------------------------------------------------------------------------------------------------------------------------------------------------------------------------------------------------------------------------------------------------------------------------------------------------------------------------------------------------------------------------------------------------------------------------------------------------------------------------------------------------------------------------------------------------------------------------------------------------------|-------------------------------------------------|
| Participant completed questionnaire | Demographic information    | Age and sex<br>Current alcohol and smoking behaviour <sup>78</sup><br>Ethnicity<br>Relationship status<br>Postcode<br>Type of housing<br>Current occupation<br>Education<br>Unpaid/paid carer [Question: Do you have an unpaid carer? (Someone who is not paid to care for you and without whose support you cannot cope. This could be a partner, family member or friend) Yes/No. Paid carer question is the same format.]<br>Household income                                                                                                                                                                                                                                                                                                                             | 0 months                                        |
|                                     | Back pain and leg symptoms | <b>Oswestry Disability Index (V2.1a)<sup>28</sup> – Primary Outcome</b><br>Troublesomeness of back and leg problems <sup>79</sup><br>Perceived ability to self-manage their condition [Question: We would like you to think about how you are managing your symptoms and your ability to walk and be mobile. How well do you feel that you are managing your back and leg problems TODAY? (Visual Analogue Scale (VAS) 0=Not managing at all; 10=Managing extremely well)]                                                                                                                                                                                                                                                                                                   | 0,6,12 months                                   |
|                                     | Quality of life            | EQ-5D-5L <sup>30</sup>                                                                                                                                                                                                                                                                                                                                                                                                                                                                                                                                                                                                                                                                                                                                                       | 0,6,12 months                                   |
|                                     | Other pain                 | Nordic pain questionnaire <sup>18 19</sup>                                                                                                                                                                                                                                                                                                                                                                                                                                                                                                                                                                                                                                                                                                                                   | 0 months                                        |
|                                     | Comorbidity                | Self-report of current health conditions                                                                                                                                                                                                                                                                                                                                                                                                                                                                                                                                                                                                                                                                                                                                     | 0 months                                        |
|                                     | Frailty                    | Tilburg Frailty Index <sup>37</sup>                                                                                                                                                                                                                                                                                                                                                                                                                                                                                                                                                                                                                                                                                                                                          | 0,6,12 months                                   |
|                                     | Physical activity          | 2 items from Rapid Assessment Disuse Index <sup>80</sup> [1. Time spent moving around on your feet; 2. Time spent sitting]                                                                                                                                                                                                                                                                                                                                                                                                                                                                                                                                                                                                                                                   | 0,6,12 months                                   |
|                                     | Mobility                   | Change in mobility in the last year [Question: Compared to one year ago, how would you rate your walking in general? Much better now than one year ago; Somewhat better than one year ago; About the same; Somewhat worse than one year ago; Much worse now than one year ago]<br>Self-rated walking speed <sup>20</sup><br>Use of walking aids inside and outside [Question: Do you use a walking aid (e.g. walking stick, walker) to walk around outside/inside? Yes; no; sometimes]<br>Change in mobility in the last 6 months [Question: Compared to 6 months ago, how would you rate your walking in general? Much better now than 6 months ago; Somewhat better than 6 months ago; About the same; Somewhat worse than 6 months ago; Much worse now than 6 months ago] | 0 months<br><br><br><br><br><br><br>6,12 months |

|                                   |                            |                                                                                                                                                                                                                                                                                                                                                                                                                                                                                                                                                                                                                                                                                                                         |                                              |
|-----------------------------------|----------------------------|-------------------------------------------------------------------------------------------------------------------------------------------------------------------------------------------------------------------------------------------------------------------------------------------------------------------------------------------------------------------------------------------------------------------------------------------------------------------------------------------------------------------------------------------------------------------------------------------------------------------------------------------------------------------------------------------------------------------------|----------------------------------------------|
|                                   | Balance and falls          | Prevention of Falls Network Europe (ProFANE) self-report of falls and fall related injuries <sup>38</sup>                                                                                                                                                                                                                                                                                                                                                                                                                                                                                                                                                                                                               | 0,6,12 months                                |
|                                   | Self-efficacy              | Single item from the Modified Gait Self-Efficacy Scale (10-item) <sup>32</sup> [Question: How much confidence do you have that you would be able to safely walk a long distance such as 1/2 mile? (VAS 0=no confidence; 10=complete confidence)]<br>Exercise self-efficacy scale (short version) <sup>22</sup><br>Self-efficacy recovery and maintenance related to performing home exercises <sup>33 34</sup>                                                                                                                                                                                                                                                                                                          | 0,6,12 months<br><br>0 months<br>6,12 months |
|                                   | Exercise adherence         | Intention to carry out home exercises <sup>81</sup> [Question: As part of the BOOST Trial, the physiotherapist will ask you to exercise at home at least twice a week for up to 20 minutes. How much do you agree with this statement? I intend to do these exercises at least twice a week for up to 20 minutes. Strongly Disagree; Disagree; Somewhat disagree; Neither agree nor disagree; Somewhat agree; Agree; Strongly agree]<br>Self-report of adherence to home exercise programme [Question: In the past 6 months, on average, how many times per week have you managed to do your exercises for at least 20 minutes? Never; 1 day per week; 2 days per week; 3-4 days per week; 5-6 days per week; Everyday] | 0 months<br><br>6,12 months                  |
|                                   | Habit (automaticity)       | Index of habit (short version) <sup>35</sup>                                                                                                                                                                                                                                                                                                                                                                                                                                                                                                                                                                                                                                                                            | 6,12 months                                  |
|                                   | Fear avoidance             | Fear avoidance beliefs questionnaire <sup>31</sup>                                                                                                                                                                                                                                                                                                                                                                                                                                                                                                                                                                                                                                                                      | 0,6,12 months                                |
|                                   | Beliefs about ageing       | Attitude to ageing questionnaire – physical changes subscale <sup>23</sup>                                                                                                                                                                                                                                                                                                                                                                                                                                                                                                                                                                                                                                              | 0 months                                     |
|                                   | Global rating of change    | Change in back and leg problems <sup>29</sup>                                                                                                                                                                                                                                                                                                                                                                                                                                                                                                                                                                                                                                                                           | 6,12 months                                  |
|                                   | Satisfaction               | Satisfaction with the exercises, changes in back & leg problems, increases in physical activity [All questions follow this format: How satisfied are you with the exercises that you were given to help with your back and leg problems? (VAS 0-4; 0=very dissatisfied; 4=very satisfied)]                                                                                                                                                                                                                                                                                                                                                                                                                              | 6,12 months                                  |
| Clinical interview and assessment | Height                     | Measured using a stadiometer                                                                                                                                                                                                                                                                                                                                                                                                                                                                                                                                                                                                                                                                                            | 0 months                                     |
|                                   | Weight                     | Measured using digital scales                                                                                                                                                                                                                                                                                                                                                                                                                                                                                                                                                                                                                                                                                           | 0 months                                     |
|                                   | Spinal parameters          | Sagittal alignment of the spine measured using C7 to wall measure <sup>40 41</sup>                                                                                                                                                                                                                                                                                                                                                                                                                                                                                                                                                                                                                                      | 0,6,12 months                                |
|                                   | Frailty                    | Hand Grip Strength <sup>44</sup> measured using a Jamar Plus+ dynamometer                                                                                                                                                                                                                                                                                                                                                                                                                                                                                                                                                                                                                                               | 0,6,12 months                                |
|                                   | Mobility                   | 6 minute walk test <sup>43</sup>                                                                                                                                                                                                                                                                                                                                                                                                                                                                                                                                                                                                                                                                                        | 0,6,12 months                                |
|                                   | Mobility/balance           | Short Physical Performance Battery <sup>82</sup>                                                                                                                                                                                                                                                                                                                                                                                                                                                                                                                                                                                                                                                                        | 0,6,12 months                                |
|                                   | Back pain and leg symptoms | STarT Back Screening Questionnaire <sup>21</sup><br>Swiss Spinal Stenosis Scale (Symptom subscale) <sup>27 83</sup>                                                                                                                                                                                                                                                                                                                                                                                                                                                                                                                                                                                                     | 0 months<br>0,6,12 months                    |
|                                   | Medication use             | Self-report of medication use                                                                                                                                                                                                                                                                                                                                                                                                                                                                                                                                                                                                                                                                                           | 0,6,12 months                                |
|                                   | Health resource use        | Client Service Receipt Inventory <sup>39</sup>                                                                                                                                                                                                                                                                                                                                                                                                                                                                                                                                                                                                                                                                          | 6,12 months                                  |
| Imaging                           | Spinal parameters          | MRI Scan - use existing scan taken in the last 12 months or referred for scan after randomisation                                                                                                                                                                                                                                                                                                                                                                                                                                                                                                                                                                                                                       | Variable                                     |

1  
2  
3  
4  
5  
6  
7  
8  
9  
10  
11  
12  
13  
14  
15  
16  
17  
18  
19  
20  
21  
22  
23  
24  
25  
26  
27  
28  
29  
30  
31  
32  
33  
34  
35  
36  
37  
38  
39  
40  
41  
42  
43  
44  
45  
46  
47  
48  
49  
50  
51  
52  
53  
54  
55  
56  
57  
58  
59  
60

**Table 4: Imaging parameters**

| <b>Sequ</b> | <b>FOV</b> | <b>Slice</b> | <b>Gap</b> | <b>TR</b> | <b>TE</b> | <b>ETL</b> | <b>Phase</b> | <b>Freq</b> | <b>Nex</b> |
|-------------|------------|--------------|------------|-----------|-----------|------------|--------------|-------------|------------|
| T2 sag      | 370        | 13/4         | 1          | 4061      | 102       | 23         | 320          | 512         | 3          |
| T1 Sag      | 370        | 13/4         | 1          | 446       | 11        | 23         | 224          | 416         | 3          |
| T2 axial    | 200        | 30/4         | 1          | 4955      | 111       | 25         | 224          | 320         | 3          |

For peer review only



Figure 1: Study flow chart



SPIRIT 2013 Checklist: Recommended items to address in a clinical trial protocol and related documents\*

| Section/item                      | Item No | Description                                                                                                                                                                                                                                                                              | Addressed on page number |
|-----------------------------------|---------|------------------------------------------------------------------------------------------------------------------------------------------------------------------------------------------------------------------------------------------------------------------------------------------|--------------------------|
| <b>Administrative information</b> |         |                                                                                                                                                                                                                                                                                          |                          |
| Title                             | 1       | Descriptive title identifying the study design, population, interventions, and, if applicable, trial acronym                                                                                                                                                                             | 1                        |
| Trial registration                | 2a      | Trial identifier and registry name. If not yet registered, name of intended registry                                                                                                                                                                                                     | 3                        |
|                                   | 2b      | All items from the World Health Organization Trial Registration Data Set                                                                                                                                                                                                                 | See ISRCTN website       |
| Protocol version                  | 3       | Date and version identifier                                                                                                                                                                                                                                                              | N/A                      |
| Funding                           | 4       | Sources and types of financial, material, and other support                                                                                                                                                                                                                              | 19-20                    |
| Roles and responsibilities        | 5a      | Names, affiliations, and roles of protocol contributors                                                                                                                                                                                                                                  | 1 and 19                 |
|                                   | 5b      | Name and contact information for the trial sponsor                                                                                                                                                                                                                                       | 19                       |
|                                   | 5c      | Role of study sponsor and funders, if any, in study design; collection, management, analysis, and interpretation of data; writing of the report; and the decision to submit the report for publication, including whether they will have ultimate authority over any of these activities | 20                       |
|                                   | 5d      | Composition, roles, and responsibilities of the coordinating centre, steering committee, endpoint adjudication committee, data management team, and other individuals or groups overseeing the trial, if applicable (see Item 21a for data monitoring committee)                         | 18-19                    |

## Introduction

|                          |    |                                                                                                                                                                                                           |            |
|--------------------------|----|-----------------------------------------------------------------------------------------------------------------------------------------------------------------------------------------------------------|------------|
| Background and rationale | 6a | Description of research question and justification for undertaking the trial, including summary of relevant studies (published and unpublished) examining benefits and harms for each intervention        | 4          |
|                          | 6b | Explanation for choice of comparators                                                                                                                                                                     | 4-5, 12-14 |
| Objectives               | 7  | Specific objectives or hypotheses                                                                                                                                                                         | 4          |
| Trial design             | 8  | Description of trial design including type of trial (eg, parallel group, crossover, factorial, single group), allocation ratio, and framework (eg, superiority, equivalence, noninferiority, exploratory) | 5          |

## Methods: Participants, interventions, and outcomes

|                      |     |                                                                                                                                                                                                |                                                                                   |
|----------------------|-----|------------------------------------------------------------------------------------------------------------------------------------------------------------------------------------------------|-----------------------------------------------------------------------------------|
| Study setting        | 9   | Description of study settings (eg, community clinic, academic hospital) and list of countries where data will be collected. Reference to where list of study sites can be obtained             | 5                                                                                 |
| Eligibility criteria | 10  | Inclusion and exclusion criteria for participants. If applicable, eligibility criteria for study centres and individuals who will perform the interventions (eg, surgeons, psychotherapists)   | 5-6                                                                               |
| Interventions        | 11a | Interventions for each group with sufficient detail to allow replication, including how and when they will be administered                                                                     | 12-14<br>A separate paper describing the intervention in detail will be published |
|                      | 11b | Criteria for discontinuing or modifying allocated interventions for a given trial participant (eg, drug dose change in response to harms, participant request, or improving/worsening disease) | 12-14                                                                             |
|                      | 11c | Strategies to improve adherence to intervention protocols, and any procedures for monitoring adherence (eg, drug tablet return, laboratory tests)                                              | 12-14                                                                             |
|                      | 11d | Relevant concomitant care and interventions that are permitted or prohibited during the trial                                                                                                  | 14                                                                                |



1  
2  
3  
4  
5  
6  
7  
8  
9  
10  
11  
12  
13  
14  
15  
16  
17  
18  
19  
20  
21  
22  
23  
24  
25  
26  
27  
28  
29  
30  
31  
32  
33  
34  
35  
36  
37  
38  
39  
40  
41  
42  
43  
44  
45  
46  
47

|                      |    |                                                                                                                                                                                                                                                                                                                                                                                |                          |
|----------------------|----|--------------------------------------------------------------------------------------------------------------------------------------------------------------------------------------------------------------------------------------------------------------------------------------------------------------------------------------------------------------------------------|--------------------------|
| Outcomes             | 12 | Primary, secondary, and other outcomes, including the specific measurement variable (eg, systolic blood pressure), analysis metric (eg, change from baseline, final value, time to event), method of aggregation (eg, median, proportion), and time point for each outcome. Explanation of the clinical relevance of chosen efficacy and harm outcomes is strongly recommended | 7-12<br>Table 3, Table 4 |
| Participant timeline | 13 | Time schedule of enrolment, interventions (including any run-ins and washouts), assessments, and visits for participants. A schematic diagram is highly recommended (see Figure)                                                                                                                                                                                               | Figure 1                 |
| Sample size          | 14 | Estimated number of participants needed to achieve study objectives and how it was determined, including clinical and statistical assumptions supporting any sample size calculations                                                                                                                                                                                          | 14-15                    |
| Recruitment          | 15 | Strategies for achieving adequate participant enrolment to reach target sample size                                                                                                                                                                                                                                                                                            | 6                        |

**Methods: Assignment of interventions (for controlled trials)**

Allocation:

|                                  |     |                                                                                                                                                                                                                                                                                                                                                          |   |
|----------------------------------|-----|----------------------------------------------------------------------------------------------------------------------------------------------------------------------------------------------------------------------------------------------------------------------------------------------------------------------------------------------------------|---|
| Sequence generation              | 16a | Method of generating the allocation sequence (eg, computer-generated random numbers), and list of any factors for stratification. To reduce predictability of a random sequence, details of any planned restriction (eg, blocking) should be provided in a separate document that is unavailable to those who enrol participants or assign interventions | 9 |
| Allocation concealment mechanism | 16b | Mechanism of implementing the allocation sequence (eg, central telephone; sequentially numbered, opaque, sealed envelopes), describing any steps to conceal the sequence until interventions are assigned                                                                                                                                                | 9 |
| Implementation                   | 16c | Who will generate the allocation sequence, who will enrol participants, and who will assign participants to interventions                                                                                                                                                                                                                                | 9 |
| Blinding (masking)               | 17a | Who will be blinded after assignment to interventions (eg, trial participants, care providers, outcome assessors, data analysts), and how                                                                                                                                                                                                                | 9 |
|                                  | 17b | If blinded, circumstances under which unblinding is permissible, and procedure for revealing a participant's allocated intervention during the trial                                                                                                                                                                                                     | 9 |

## Methods: Data collection, management, and analysis

|    |                     |     |                                                                                                                                                                                                                                                                                                                                                                                                              |                          |
|----|---------------------|-----|--------------------------------------------------------------------------------------------------------------------------------------------------------------------------------------------------------------------------------------------------------------------------------------------------------------------------------------------------------------------------------------------------------------|--------------------------|
| 1  |                     |     |                                                                                                                                                                                                                                                                                                                                                                                                              |                          |
| 2  |                     |     |                                                                                                                                                                                                                                                                                                                                                                                                              |                          |
| 3  |                     |     |                                                                                                                                                                                                                                                                                                                                                                                                              |                          |
| 4  |                     |     |                                                                                                                                                                                                                                                                                                                                                                                                              |                          |
| 5  |                     |     |                                                                                                                                                                                                                                                                                                                                                                                                              |                          |
| 6  |                     |     |                                                                                                                                                                                                                                                                                                                                                                                                              |                          |
| 7  | Data collection     | 18a | Plans for assessment and collection of outcome, baseline, and other trial data, including any related processes to promote data quality (eg, duplicate measurements, training of assessors) and a description of study instruments (eg, questionnaires, laboratory tests) along with their reliability and validity, if known. Reference to where data collection forms can be found, if not in the protocol | 7-12<br>Table 3, Table 4 |
| 8  | methods             |     |                                                                                                                                                                                                                                                                                                                                                                                                              |                          |
| 9  |                     |     |                                                                                                                                                                                                                                                                                                                                                                                                              |                          |
| 10 |                     |     |                                                                                                                                                                                                                                                                                                                                                                                                              |                          |
| 11 |                     |     |                                                                                                                                                                                                                                                                                                                                                                                                              |                          |
| 12 |                     | 18b | Plans to promote participant retention and complete follow-up, including list of any outcome data to be collected for participants who discontinue or deviate from intervention protocols                                                                                                                                                                                                                    | 11-12                    |
| 13 |                     |     |                                                                                                                                                                                                                                                                                                                                                                                                              |                          |
| 14 |                     |     |                                                                                                                                                                                                                                                                                                                                                                                                              |                          |
| 15 | Data management     | 19  | Plans for data entry, coding, security, and storage, including any related processes to promote data quality (eg, double data entry; range checks for data values). Reference to where details of data management procedures can be found, if not in the protocol                                                                                                                                            | 18                       |
| 16 |                     |     |                                                                                                                                                                                                                                                                                                                                                                                                              |                          |
| 17 |                     |     |                                                                                                                                                                                                                                                                                                                                                                                                              |                          |
| 18 |                     |     |                                                                                                                                                                                                                                                                                                                                                                                                              |                          |
| 19 | Statistical methods | 20a | Statistical methods for analysing primary and secondary outcomes. Reference to where other details of the statistical analysis plan can be found, if not in the protocol                                                                                                                                                                                                                                     | 15-17                    |
| 20 |                     |     |                                                                                                                                                                                                                                                                                                                                                                                                              |                          |
| 21 |                     |     |                                                                                                                                                                                                                                                                                                                                                                                                              |                          |
| 22 |                     | 20b | Methods for any additional analyses (eg, subgroup and adjusted analyses)                                                                                                                                                                                                                                                                                                                                     | 15-17                    |
| 23 |                     |     |                                                                                                                                                                                                                                                                                                                                                                                                              |                          |
| 24 |                     | 20c | Definition of analysis population relating to protocol non-adherence (eg, as randomised analysis), and any statistical methods to handle missing data (eg, multiple imputation)                                                                                                                                                                                                                              | 15-17                    |
| 25 |                     |     |                                                                                                                                                                                                                                                                                                                                                                                                              |                          |
| 26 |                     |     |                                                                                                                                                                                                                                                                                                                                                                                                              |                          |
| 27 |                     |     |                                                                                                                                                                                                                                                                                                                                                                                                              |                          |
| 28 |                     |     |                                                                                                                                                                                                                                                                                                                                                                                                              |                          |
| 29 |                     |     |                                                                                                                                                                                                                                                                                                                                                                                                              |                          |
| 30 |                     |     |                                                                                                                                                                                                                                                                                                                                                                                                              |                          |
| 31 | Data monitoring     | 21a | Composition of data monitoring committee (DMC); summary of its role and reporting structure; statement of whether it is independent from the sponsor and competing interests; and reference to where further details about its charter can be found, if not in the protocol. Alternatively, an explanation of why a DMC is not needed                                                                        | 18-19                    |
| 32 |                     |     |                                                                                                                                                                                                                                                                                                                                                                                                              |                          |
| 33 |                     |     |                                                                                                                                                                                                                                                                                                                                                                                                              |                          |
| 34 |                     |     |                                                                                                                                                                                                                                                                                                                                                                                                              |                          |
| 35 |                     | 21b | Description of any interim analyses and stopping guidelines, including who will have access to these interim results and make the final decision to terminate the trial                                                                                                                                                                                                                                      | 18-19                    |
| 36 |                     |     |                                                                                                                                                                                                                                                                                                                                                                                                              |                          |
| 37 |                     |     |                                                                                                                                                                                                                                                                                                                                                                                                              |                          |
| 38 | Harms               | 22  | Plans for collecting, assessing, reporting, and managing solicited and spontaneously reported adverse events and other unintended effects of trial interventions or trial conduct                                                                                                                                                                                                                            | 12                       |
| 39 |                     |     |                                                                                                                                                                                                                                                                                                                                                                                                              |                          |
| 40 |                     |     |                                                                                                                                                                                                                                                                                                                                                                                                              |                          |
| 41 |                     |     |                                                                                                                                                                                                                                                                                                                                                                                                              |                          |
| 42 |                     |     |                                                                                                                                                                                                                                                                                                                                                                                                              |                          |
| 43 |                     |     |                                                                                                                                                                                                                                                                                                                                                                                                              |                          |
| 44 |                     |     |                                                                                                                                                                                                                                                                                                                                                                                                              |                          |
| 45 |                     |     |                                                                                                                                                                                                                                                                                                                                                                                                              |                          |
| 46 |                     |     |                                                                                                                                                                                                                                                                                                                                                                                                              |                          |
| 47 |                     |     |                                                                                                                                                                                                                                                                                                                                                                                                              |                          |

|    |                                 |     |                                                                                                                                                                                                                                                                                     |             |
|----|---------------------------------|-----|-------------------------------------------------------------------------------------------------------------------------------------------------------------------------------------------------------------------------------------------------------------------------------------|-------------|
| 1  |                                 |     |                                                                                                                                                                                                                                                                                     |             |
| 2  |                                 |     |                                                                                                                                                                                                                                                                                     |             |
| 3  | Auditing                        | 23  | Frequency and procedures for auditing trial conduct, if any, and whether the process will be independent from investigators and the sponsor                                                                                                                                         | 12,14,18-19 |
| 4  |                                 |     |                                                                                                                                                                                                                                                                                     |             |
| 5  |                                 |     |                                                                                                                                                                                                                                                                                     |             |
| 6  | <b>Ethics and dissemination</b> |     |                                                                                                                                                                                                                                                                                     |             |
| 7  |                                 |     |                                                                                                                                                                                                                                                                                     |             |
| 8  | Research ethics approval        | 24  | Plans for seeking research ethics committee/institutional review board (REC/IRB) approval                                                                                                                                                                                           | 18          |
| 9  |                                 |     |                                                                                                                                                                                                                                                                                     |             |
| 10 |                                 |     |                                                                                                                                                                                                                                                                                     |             |
| 11 | Protocol amendments             | 25  | Plans for communicating important protocol modifications (eg, changes to eligibility criteria, outcomes, analyses) to relevant parties (eg, investigators, REC/IRBs, trial participants, trial registries, journals, regulators)                                                    | 18          |
| 12 |                                 |     |                                                                                                                                                                                                                                                                                     |             |
| 13 |                                 |     |                                                                                                                                                                                                                                                                                     |             |
| 14 |                                 |     |                                                                                                                                                                                                                                                                                     |             |
| 15 | Consent or assent               | 26a | Who will obtain informed consent or assent from potential trial participants or authorised surrogates, and how (see Item 32)                                                                                                                                                        | 7, 17       |
| 16 |                                 |     |                                                                                                                                                                                                                                                                                     |             |
| 17 |                                 |     |                                                                                                                                                                                                                                                                                     |             |
| 18 |                                 | 26b | Additional consent provisions for collection and use of participant data and biological specimens in ancillary studies, if applicable                                                                                                                                               | N/A         |
| 19 |                                 |     |                                                                                                                                                                                                                                                                                     |             |
| 20 |                                 |     |                                                                                                                                                                                                                                                                                     |             |
| 21 | Confidentiality                 | 27  | How personal information about potential and enrolled participants will be collected, shared, and maintained in order to protect confidentiality before, during, and after the trial                                                                                                | 18          |
| 22 |                                 |     |                                                                                                                                                                                                                                                                                     |             |
| 23 |                                 |     |                                                                                                                                                                                                                                                                                     |             |
| 24 | Declaration of interests        | 28  | Financial and other competing interests for principal investigators for the overall trial and each study site                                                                                                                                                                       | 20          |
| 25 |                                 |     |                                                                                                                                                                                                                                                                                     |             |
| 26 |                                 |     |                                                                                                                                                                                                                                                                                     |             |
| 27 | Access to data                  | 29  | Statement of who will have access to the final trial dataset, and disclosure of contractual agreements that limit such access for investigators                                                                                                                                     | 20          |
| 28 |                                 |     |                                                                                                                                                                                                                                                                                     |             |
| 29 |                                 |     |                                                                                                                                                                                                                                                                                     |             |
| 30 | Ancillary and post-trial care   | 30  | Provisions, if any, for ancillary and post-trial care, and for compensation to those who suffer harm from trial participation                                                                                                                                                       | N/A         |
| 31 |                                 |     |                                                                                                                                                                                                                                                                                     |             |
| 32 |                                 |     |                                                                                                                                                                                                                                                                                     |             |
| 33 | Dissemination policy            | 31a | Plans for investigators and sponsor to communicate trial results to participants, healthcare professionals, the public, and other relevant groups (eg, via publication, reporting in results databases, or other data sharing arrangements), including any publication restrictions | 19          |
| 34 |                                 |     |                                                                                                                                                                                                                                                                                     |             |
| 35 |                                 |     |                                                                                                                                                                                                                                                                                     |             |
| 36 |                                 |     |                                                                                                                                                                                                                                                                                     |             |
| 37 |                                 | 31b | Authorship eligibility guidelines and any intended use of professional writers                                                                                                                                                                                                      | N/A         |
| 38 |                                 |     |                                                                                                                                                                                                                                                                                     |             |
| 39 |                                 | 31c | Plans, if any, for granting public access to the full protocol, participant-level dataset, and statistical code                                                                                                                                                                     | 20          |
| 40 |                                 |     |                                                                                                                                                                                                                                                                                     |             |
| 41 |                                 |     |                                                                                                                                                                                                                                                                                     |             |
| 42 |                                 |     |                                                                                                                                                                                                                                                                                     |             |
| 43 |                                 |     |                                                                                                                                                                                                                                                                                     |             |
| 44 |                                 |     |                                                                                                                                                                                                                                                                                     |             |
| 45 |                                 |     |                                                                                                                                                                                                                                                                                     |             |
| 46 |                                 |     |                                                                                                                                                                                                                                                                                     |             |
| 47 |                                 |     |                                                                                                                                                                                                                                                                                     |             |

**Appendices**

|                            |    |                                                                                                                                                                                                |                     |
|----------------------------|----|------------------------------------------------------------------------------------------------------------------------------------------------------------------------------------------------|---------------------|
| Informed consent materials | 32 | Model consent form and other related documentation given to participants and authorised surrogates                                                                                             | Approved by the REC |
| Biological specimens       | 33 | Plans for collection, laboratory evaluation, and storage of biological specimens for genetic or molecular analysis in the current trial and for future use in ancillary studies, if applicable | N/A                 |

---

\*It is strongly recommended that this checklist be read in conjunction with the SPIRIT 2013 Explanation & Elaboration for important clarification on the items. Amendments to the protocol should be tracked and dated. The SPIRIT checklist is copyrighted by the SPIRIT Group under the Creative Commons "[Attribution-NonCommercial-NoDerivs 3.0 Unported](#)" license.

Peer review only
